1 **A platform of patient-derived microtumors identifies treatment**  
2 **response and therapeutic vulnerabilities of ovarian cancer.**

3 Nicole Anderle<sup>1\*</sup>, André Koch<sup>2</sup>, Berthold Gierke<sup>3</sup>, Anna-Lena Keller<sup>1</sup>, Annette Staebler<sup>4</sup>,  
4 Andreas Hartkopf<sup>2</sup>, Sara Y. Brucker<sup>2,5</sup>, Michael Pawlak<sup>3</sup>, Katja Schenke-Layland<sup>1,2,5,6,7</sup>,  
5 Christian Schmees<sup>1\*</sup>

6

7 <sup>1</sup>NMI Natural and Medical Sciences Institute at the University of Tuebingen, Reutlingen, 72770  
8 Germany.

9

10 <sup>2</sup>Department of Women's Health, Eberhard Karls University Tuebingen, Tuebingen, 72076  
11 Germany.

12

13 <sup>3</sup>NMI Technologie Transfer GmbH, Pharmaservices Protein Profiling, Reutlingen, 72770  
14 Germany.

15

16 <sup>4</sup>Institute of Pathology and Neuropathology, Eberhard Karls University Tuebingen, Tuebingen,  
17 72076 Germany.

18

19 <sup>5</sup>Cluster of Excellence iFIT (EXC2180) "Image-Guided and Functionally Instructed Tumor  
20 Therapies", Eberhard Karls University Tuebingen, Tuebingen, 72076 Germany.

21

22 <sup>6</sup>Department of Biomedical Engineering, Eberhard Karls University Tuebingen, 72076 Tuebingen,  
23 Germany.

24

25 <sup>7</sup>Department of Medicine/Cardiology, Cardiovascular Research Laboratories, David Geffen  
26 School of Medicine at UCLA, Los Angeles, CA, 90095 USA.

27

28

29 \* Nicole Anderle, Christian Schmees

30 **Email:** nicole.anderle@nmi.de, [christian.schmees@nmi.de](mailto:christian.schmees@nmi.de)

31

32

33

34

35

36

37

38

## 39 **Abstract**

40 Ovarian cancer (OvCa) is an insidious disease: due to nonspecific symptoms, these tumors are  
41 usually diagnosed at advanced stage with correspondingly devastating consequences for  
42 treatment outcome and patient survival. The broad heterogeneity of OvCa manifests itself in the  
43 complex composition of the tumor microenvironment. Given the frequent development of  
44 therapeutic resistance, there is a strong need for model systems accurately representing OvCa  
45 heterogeneity, while enabling parallel drug testing and prediction of appropriate treatment  
46 responses in individual patients. Here, we demonstrate the efficient isolation of highly viable  
47 OvCa patient-derived microtumors (OvCa PDM). Importantly, our data demonstrate  
48 histopathological comparability of OvCa PDM with corresponding patient tumor tissue. Reverse  
49 phase protein array (RPPA)-based analyses of >110 total and phospho-proteins enabled the  
50 identification of sensitivities to standard, platinum-based as well as experimental, selumetinib-  
51 based therapy, and thereby the prediction of treatment-responder. Parallelized drug testing in  
52 OvCa PDM allowed functional validation of RPPA data and detection of on- and off-target  
53 treatment effects. Strikingly, clinical follow-up of corresponding patients confirmed significantly  
54 increased metastasis-free survival of identified carboplatin-responder. Furthermore, flow  
55 cytometry-based characterization of autologous TIL populations confirmed the presence of tumor-  
56 specific, cytotoxic TILs with stem-like CD39<sup>+</sup>PD1<sup>+</sup> and terminally differentiated CD39<sup>+</sup>PD1<sup>+</sup>  
57 phenotypes. Interestingly, our results showed a significant correlation between the presence of  
58 CD8<sup>+</sup>CD39<sup>+</sup> TILs and lymph node metastasis in the associated patients. Finally, combining OvCa  
59 PDM and autologous TILs for efficacy testing of immune checkpoint inhibitors demonstrated the  
60 potential for patient-specific enhancement of cytotoxic TIL activity by this therapeutic approach.

## 61 **Main Text**

### 62 **Introduction**

63  
64  
65 Ovarian cancer (OvCa) is among the most lethal gynecological diseases in women with a 5-year  
66 survival rate of ~30% for advanced stage compared to 92% for the early diagnosed localized,  
67 primary disease state <sup>1</sup>. In view of dismal treatment success rates, substantial efforts have been  
68 made to resolve the complexity of OvCa, especially for high-grade serous carcinomas (HGSC).  
69 Despite the success of genomics and transcriptomics in elucidating disease determinants, the  
70 principles of OvCa responsiveness to therapy are still poorly understood <sup>2</sup>.

71 In this context, patient-derived model systems are expected to play an important role in order to  
72 identify suitable and effective therapies for the individual patient as well as existing therapeutic  
73 resistances of the patient's tumor. Even though recent studies have described the combination of  
74 PDO cultures with components of the tumor microenvironment including fibroblasts, endothelial  
75 cells and immune cells <sup>3</sup>, PDOs do not reflect the original composition of primary tumor tissue in  
76 terms of extracellular matrix, tumor-associated fibroblasts, tumor-infiltrating lymphocytes (TILs),  
77 macrophages (TAMs), and tumor endothelial cells. Another challenge of current PDO models in  
78 terms of applicability for individualized tumor response testing relates to the required  
79 establishment time of 1-3 months with a corresponding impact on the timeframe to obtain drug  
80 testing results <sup>4</sup>.

81 Here, we introduce a three-dimensional (3D) preclinical OvCa model composed of patient-derived  
82 microtumors (PDM) as well as autologous tumor-infiltrating lymphocytes (TIL) isolated from  
83 primary OvCa tissue specimen in a clinical relevant time-frame. PDM recapitulate a 3D histo-  
84 architecture with retained cell-cell contacts and native intra-tumoral heterogeneity featuring the  
85 corresponding primary tumor microenvironment (incl. extracellular matrix proteins, stromal  
86 fibroblasts and immune cells). In combination with functional compound efficacy testing and  
87 multiplexed TIL phenotyping, we assessed the correlation of individual OvCa PDM responses to  
88 chemotherapeutic, targeted as well as immunotherapeutic treatment approaches using OvCa  
89 PDM alone and in co-culture with autologous TILs, respectively. We used Reverse Phase Protein

90 Array (RPPA) analysis to map protein-signaling pathways of PDM and to measure on- and off-  
91 target pathway effects in compound treated PDM. Strikingly, a correlation of obtained data in  
92 OvCa PDM models with clinical follow-up data of corresponding patients showed a significant  
93 increase in metastasis-free survival of identified carboplatin-responder as compared to non-  
94 responder.

## 95 **Results**

96

### 97 **Isolation of highly viable patient-derived microtumors from primary OvCa tissue samples** 98 **by limited enzymatic digestion**

99

100 Residual fresh tumor tissue samples were collected from n = 19 patients suffering from OvCa and  
101 undergoing primary tumor debulking surgery. Available, anonymized clinicopathological  
102 characteristics including International Federation of Gynecology and Obstetrics (FIGO) staging  
103 and pathological TNM-classification of respective individuals are summarized in Table S1. 2/19  
104 patients (OvCa #4 and OvCa #18) received neoadjuvant treatment with carboplatin/paclitaxel  
105 chemotherapy. The majority of included samples (n = 17) were derived from the most common  
106 type of OvCa, i.e. epithelial OvCa, with a majority of high-grade serous carcinomas (HGSC). Two  
107 samples were classified as sex-chord-stromal ovarian carcinomas that are either non-malignant  
108 or at a low stage. PDM isolation adapted from Kondo *et al.* 2011<sup>5</sup> and TIL isolation was  
109 performed on freshly excised tumor tissue specimen. Isolation of PDM amounts suitable for  
110 downstream analyses was successful in >70% (14/19) of the tumor samples (Fig. 1A). PDMs  
111 were cultured in suspension in the absence of serum for a maximum of three weeks. No  
112 correlation was observed between successful isolation of PDM and available clinical patient data  
113 such as age, lymph node spread, distant cancer spread, perineural invasion or FIGO stage  
114 (Table S2). PDM viability was assessed by parallel staining with Calcein-AM and SYTOX™  
115 Orange (Fig. 1B). 2D projections of 3D images displayed highly viable PDM with few dead cells.  
116 Dead PDM cells (according to nuclear SYTOX™ Orange staining) were detached from PDM and  
117 thus observed mostly as single cells floating in the culture media. The quantification of the viable  
118 cell volume and dead cell volume in 3D projections of four exemplary OvCa PDM models are  
119 shown in Fig. 1C. In each analyzed model, ≤ 7% of the total PDM cell mass represented dead  
120 cells confirming robust PDM viability.

121

### 122 **OvCa PDM sections resemble histopathological characteristics of the corresponding** 123 **primary tumor tissue (PTT)**

124

125 We next performed Hematoxylin and Eosin staining (H&E) of FFPE- and cryosections,  
126 respectively, derived from OvCa PDM and corresponding primary tumor tissue sections (PTT) for  
127 histopathological comparison. Professional assessment of PDM by a certified pathologist,  
128 confirmed typical, distinct histopathological characteristics of OvCa (Fig. 1D and Fig. S1). HGSC  
129 derived PDM reflected architectural patterns such as papillary growth, irregular branching, cystic  
130 and glandular structures (Fig. 1D OvCa #17-23; Fig. S1, OvCa #24, 26) as compared to the  
131 corresponding PTT specimen. Pleomorphic nuclei/cells, high nucleus:cytoplasm ratio as well as  
132 hyperchromasia were similar in PDM and corresponding PTT sections reflecting the high-grade of  
133 analyzed HGSC tumors. These tumor features were not detected within OvCa PDM #8 (Fig. S1),  
134 which originated from low-grade mucosal OvCa known for slow tumor growth. Instead, OvCa #8  
135 PDM displayed a unicellular epithelium and mostly stromal remains. In summary,  
136 histopathological analyses of PDM confirmed structural and cellular similarities to the  
137 corresponding primary tumor specimen resembling typical histological features of ovarian  
138 carcinomas.

139

140

141

142

## 143 **PDMs reflect intra- and intertumoral heterogeneity of the original tumor**

144

145 For further characterization and study of the similarity of OvCa PDM and corresponding PTT, the  
146 expression of histotype specific markers, different tumor cell-, extracellular matrix- and immune  
147 cell-markers were assessed by immunohistochemistry (Fig. 1D, Fig. S1). In the clinics,  
148 immunohistochemical staining of p53 and Wilms Tumor 1 (WT1) is applied for differential  
149 diagnosis of HGSCs<sup>6</sup>. HGSC phenotype of the original tumor persists in the corresponding PDM  
150 as marker expression of WT1/p53 highly corresponded with either low-to-moderate (OvCa #17-  
151 18) or strong expression (OvCa #23). Mesothelin (MSLN) and CA125 (MUC16) were used as  
152 additional OvCa markers. Mesothelin, known to be over-expressed on the cell surface in OvCa<sup>7-</sup>  
153 <sup>9</sup>, was readily expressed in OvCa PDM resembling expression of this marker in their  
154 corresponding PTT. Besides MSLN, CA125 expression has previously been described as an  
155 immunohistochemical marker to confirm ovarian origin of the tumor<sup>10</sup>. As shown before<sup>11,12</sup>,  
156 expression of CA125 in OvCa sections can vary within one type and between the different OvCa  
157 tumor types. Accordingly, PTT sections derived from non-HGSC displayed no CA125 expression  
158 (OvCa #8) in contrast to HGSC-derived tumor sections (OvCa #17-18, #23-26). In PDM models  
159 OvCa#8, #17, #18 and #24 staining patterns of MSLN and CA125 were similar to corresponding  
160 PTT sections and were often restricted to cells at the tumor margin for CA125 (e.g. OvCa #18,  
161 #23). As the tumor microenvironment is known to play a major role in tumor progression and  
162 metastasis<sup>13-15</sup>, we analyzed the presence of extracellular matrix (ECM) and stromal components  
163 in OvCa PDM and corresponding PTT. Sections were stained for FAP $\alpha$  (Fibroblast associated  
164 protein alpha), a marker of activated fibroblasts, also known as cancer-associated fibroblasts  
165 (CAFs). FAP $\alpha$  expression in tumor stroma is observed in 90% of human cancers of epithelial  
166 origin and has been described to induce tumor progression and chemoresistance<sup>16</sup>. FAP $\alpha$   
167 staining in OvCa PDM mostly resembled that of the corresponding PTT in all samples except for  
168 OvCa #24-26 and differed from low to high expression. Collagen I expression, known to promote  
169 invasiveness and tumor progression in epithelial OvCa<sup>17</sup>, was also prominent within OvCa PDM.  
170 Stainings correlated with corresponding PTT that showed an overall strong Collagen I expression  
171 except for OvCa #25. We also observed a strong correlation of Hyaluronan Binding Protein 1  
172 (C1QBP) expression in PDM and corresponding PTT, which interacts with the major ECM  
173 component hyaluronan<sup>18</sup>. In summary, all studied stromal components were found to be highly  
174 abundant within OvCa PDM and corresponding PTT. To further examine tumor  
175 microenvironmental (TME) components of PDM, we studied the infiltration with tumor-associated  
176 macrophages (TAMs) via CD163 expression together with the expression of the inhibitory  
177 checkpoint receptor ligand PD-L1. Analysis rarely detected M2-like TAMs (CD163<sup>+</sup>) within PTT  
178 and PDM sections and if so, mostly in stromal tissue parts. While macrophages were highly  
179 frequent in OvCa #24 PTT, they were not detected in the corresponding PDM (Fig. S1). In  
180 contrast, for OvCa #17, CD163<sup>+</sup> TAMs were detected in both PDM and PTT sections (Fig. 1).  
181 Immune checkpoint receptor ligands are known to be expressed on tumor and/or immune cells of  
182 the tumor microenvironment. Here, PD-L1 expression was mostly absent in OvCa PTT and  
183 corresponding PDM sections. In conclusion, PDM largely resembled features of the original tumor  
184 by direct comparison with corresponding PTT including presence of complex ECM and TME  
185 architecture and expression of markers specific for OvCa. In comparison with corresponding PTT  
186 sections, pure stromal areas were mostly absent from stained PDM sections, which might explain  
187 differences observed between PDM and corresponding PTT with regard to immune cell infiltration  
188 and degree of expression of stromal components.

189

## 190 **Protein signaling pathway profiling of OvCa PDM by RPPA**

191

192 After initial immunohistochemical characterization of the 3D OvCa PDM that confirmed the  
193 presence of TME components in PDM similar to corresponding PTT, we performed an in-depth  
194 examination of the heterogeneity and molecular composition of different OvCa PDM models by  
195 generating complete signaling pathway protein profiles using RPPA. Protein abundances of 116  
196 different proteins (including total and post-translationally modified forms) were measured in OvCa

197 PDM samples each with a sample size of  $n = 100-150$  per individual PDM (Fig. 2A). One further  
198 PDM sample derived from human BC (breast cancer) was included to scale up the protein  
199 sample data and for comparison as both cancer types are known to share molecular and  
200 microenvironmental similarities<sup>15,19</sup>. Obtained protein-normalized, background-corrected mean  
201 fluorescence intensity (NFI) signals were median-centered to all samples ( $n = 8$ ) and  $\log_2$   
202 transformed. Protein profiles of PDM samples covered signaling pathways such as for cell cycle,  
203 DNA damage response, apoptosis, chromatin regulation, MAPK/RTK, PI3K/AKT with mTOR, Wnt  
204 and NF $\kappa$ B, as well as OvCa tumor/stem cell markers. By hierarchical clustering (HCL), PDM were  
205 grouped according to their similarities in relative protein signal intensity (Fig. 2A). Data analysis  
206 revealed three clusters: 1) OvCa #21 (OvCa granulosa cell tumor) and #23 (HGSC), with the  
207 most distinct protein profiles as compared to the other PDM analyzed; 2) OvCa #19 (HGSC) and  
208 the BC PDM shared more similarities than OvCa #19 with the other OvCa PDM models; 3). The  
209 remaining PDM samples resembled the third cluster with the most similar protein expression  
210 profiles containing exclusively HGSC models. Long distances of the sample dendrogram further  
211 underlines the proteomic heterogeneity of similar histopathological OvCa tumor types.  
212 To compare protein abundances within different signaling pathways as well as of tumor/stem cell  
213 markers, proteins with impact on pathway activity were sorted according to their pathway  
214 affiliation (Fig. 2B, Table S3). Significant differences between PDM models were observed for the  
215 cell cycle pathway and the MAPK/RTK pathway. Highest cell cycle activity was found in OvCa  
216 #17 and #24 with almost 50% higher median NFI signals compared to OvCa #21 with the lowest  
217 median signals (median NFI =  $-0.33 \log_2$ ) resembling a different histopathological tumor type  
218 compared to the other PDM models analyzed. MAPK/RTK pathway signaling was increased in  
219 OvCa #21 (median NFI =  $0.38 \log_2$ ), #23 (median NFI =  $0.32 \log_2$ ), #24 (median NFI =  $0.31 \log_2$ )  
220 and #17 (median NFI =  $0.30 \log_2$ ). The BC PDM model was characterized by decreased median  
221 NFI signals of MAPK/RTK proteins (median NFI =  $-0.47 \log_2$ ). Proteins related to PI3K/AKT  
222 pathway and of associated pathways were more abundant in OvCa #17 and #24. mTOR pathway  
223 levels were elevated in OvCa #24 (median NFI =  $0.54 \log_2$ ) in other OvCa PDM this pathway  
224 showed comparable activity. Median NFI signals from apoptosis-related proteins were  
225 significantly different between OvCa #25 (median NFI =  $0.75 \log_2$ ) and BC PDM (median NFI=  
226  $1.41 \log_2$ ). OvCa tumor/stem cell marker protein abundance was significantly upregulated in both  
227 OvCa #17 and #23 compared to BC PDM. RPPA protein profiling analysis demonstrated the  
228 heterogeneous activity of several signaling pathways within different OvCa PDM. Apoptosis-  
229 related proteins and OvCa tumor/stem cell marker proteins indicated the strongest differences  
230 between OvCa PDM models and the BC PDM model.

### 231 232 **Heterogeneous treatment responses towards chemo- and targeted therapy assessed by** 233 **functional compound testing in OvCa PDM**

234  
235 Next, we used OvCa PDM as a platform for functional compound testing using standard-of-care  
236 chemotherapy treatment and targeted therapies. Further, we sought to relate treatment  
237 responses in PDM to the generated protein profiling datasets. Studies of targeted therapies in  
238 OvCa are often limited to clinical phase I and II or even cell-line based preclinical studies<sup>20-22</sup>, as  
239 treatment efficacies are heterogeneous and mostly not beneficial compared to standard  
240 chemotherapy. However, targeting specific signaling pathways could demonstrate a treatment  
241 alternative for individual OvCa patients either as first-line or recurrent-cancer therapy. As we have  
242 discovered that protein abundances differed the most in the cell cycle and MAPK/RTK pathway in  
243 OvCa PDM (Fig. 2A-B), we investigated efficacy of targeted inhibition of these pathways with the  
244 CDK4/6 inhibitor palbociclib, the MEK1/2 inhibitor selumetinib, as well as the Src-inhibitor  
245 saracatinib and compared these treatments to standard platinum-based chemotherapy (Fig. 2C).  
246 PDM were treated with respective drugs, each at three different concentrations, chosen according  
247 to previously reported  $C_{\max}$  concentrations<sup>23</sup>. Treatment efficacy in OvCa PDM – as measured by  
248 cytotoxicity - was heterogeneous among individual PDM models, with some specifically  
249 responding to carboplatin (most prominently OvCa #24) and others to targeted therapy (OvCa  
250 #19, #21, #26). Carboplatin induced the most significant cytotoxic effects at the lowest dose (75



251  $\mu\text{M}$ ) at longest duration  $t = 72$  h in OvCa #17 and #24 (Fig. 2C). On the molecular level, RPPA  
252 protein profiling revealed significantly increased cell cycle activity in both models (Fig. 2B), which  
253 might be associated with the stronger carboplatin response observed in OvCa PDM #17 and #24.  
254 Two other PDM models were also carboplatin sensitive, but responded to treatment at higher  
255 dose (OvCa #23, #25). Accordingly, both had shown intermediate cell cycle activity in protein  
256 profiling analyses (Fig. 2A-B). Selumetinib induced significant cell death in OvCa #17, #19, #21  
257 and #23 at a final concentration of 100-150 nM (Fig. 2C). The strongest effect was observed for  
258 OvCa #21, which displayed comparatively high MAPK/RTK pathway activity (Fig. 2B). Palbociclib,  
259 an inhibitor of G1-cell cycle progression, caused significant cytotoxicity in OvCa #25 and #26,  
260 which both had shown moderate cell cycle activity in RPPA protein analysis (Fig. 2B). PDM  
261 models with significantly higher cell cycle activity as measured by RPPA (OvCa #17, #24), did not  
262 respond to palbociclib treatment. Inhibition of the Src-pathway by saracatinib caused significant  
263 and dose-dependent killing effects in OvCa #26. Saracatinib triggered rapid PDM death already  
264 after 24-48 h of treatment. In conclusion, functional compound testing further confirmed the  
265 molecular heterogeneity of studied OvCa PDM models identified by protein profiling. Interestingly,  
266 PDM models showing resistance to standard chemotherapy with carboplatin were instead  
267 sensitive towards targeted therapeutic approaches.

## 268 269 **Correlation of treatment response and activation state of protein signaling pathways**

270  
271 To relate the analyzed protein signaling pathways of untreated OvCa PDM to observed treatment  
272 responses, protein NFI signals of PDM were grouped into responder and non-responder profiles  
273 according to results from functional compound testing (Fig. 2C, Fig. S2). Significant differences of  
274 pathway signaling in carboplatin/selumetinib responder and non-responder models were  
275 analyzed. Further, we examined the on- and off-target pathway effects within different OvCa PDM  
276 models by RPPA to assess drug mode-of-action (Fig. 3). For this aim, OvCa PDM were treated at  
277 one compound concentration and compared to vehicle (DMSO) control. Treatment-to-control  
278 signal ratios (TR) were determined from protein NFI signals of treated PDM samples and DMSO  
279 vehicle controls at three different time points for each treatment: immediate (30 min), early (4 h)  
280 and late (72 h). This enabled the exploration of fast and late treatment response based on  
281 changes of protein abundances within a given time frame.

## 282 283 **Carboplatin treatment sensitivity of OvCa PDM correlates with high protein** 284 **abundance of G2-M cell cycle proteins**

285  
286 HCL clustering of PDM protein NFI signals led to five clusters that distinguish carboplatin  
287 sensitive and resistant PDM models (Fig. S3A). To analyze significant differences related to  
288 activation or inactivation of signal transduction pathways, proteins from the HCL clustering were  
289 sorted according to their pathway affiliation and according to upregulation or downregulation in  
290 responder. Carboplatin-responder showed significantly increased cell cycle activity ( $P < 0.001$ ;  
291 Fig. 3A) with upregulated protein abundance observed for Aurora A kinase (mean NFI = 0.74  
292  $\log_2$ ), CDK2 (mean NFI = 0.8  $\log_2$ ), Cyclin B1 (mean NFI = 0.84  $\log_2$ ), PCNA (mean NFI = 0.84  
293  $\log_2$ ), and acetylated Tubulin (mean NFI = 0.1  $\log_2$ ) (Fig. S3B), which are mostly related to  
294 "mitosis"<sup>24,25</sup>. Aurora A (Spearman's  $r = 0.912$ ,  $P = 0.022$ ), Cyclin B1 (Spearman's  $r = 0.971$ ,  $P =$   
295  $0.011$ ) and PCNA (Spearman's  $r = 0.912$ ,  $P = 0.022$ ) significantly correlated with carboplatin  
296 treatment sensitivity (Table S4), which was graded according to recorded significance levels from  
297 0-3 ("0":  $P > 0.05$ ; "1":  $P < 0.05$ ; "2":  $P < 0.01$ ; "3":  $P < 0.001$ ) (Fig. S2). At the same time, non-  
298 responder showed higher abundance of CDK1 (mean NFI = 0.38  $\log_2$ ), phospho-CDK2 (mean  
299 NFI = 0.77  $\log_2$ ) and phospho-CDK4 (mean NFI = 0.37  $\log_2$ ) (Fig. S3C), which are more related to  
300 the G0/G1 cell cycle phase. In addition, the apoptosis/DNA damage response pathway was  
301 significantly upregulated in responder OvCa PDM models compared to non-responder ( $P =$   
302  $0.021$ ; Fig. 3A), especially with high abundance of cleaved Caspase-8 and cleaved PARP (Fig.  
303 S3B). Additional significant differences between responder and non-responder OvCa PDM were  
304 detected within the RTK and the PI3K/AKT/NFkB signaling pathways ( $P < 0.001$ ; Fig. 3A). These

305 pathways were downregulated in the non-responder group. Higher EMT/tumor/CSC marker  
306 abundance was significantly associated with the carboplatin responder group (Fig. 3A). Markers  
307 included Mesothelin, Nanog, STAT1, and E-Cadherin (Fig. S3B). In contrast, there were few  
308 proteins found, which were downregulated in the responder group. Collectively, this panel of  
309 downregulated proteins differed significantly compared to the non-responder group (Fig. 3A). It  
310 contained early cell cycle markers e.g. Aurora A and Cyclin B1, the mTOR pathway effector  
311 phospho-S6RP, PDGFR and SNAI1 (Fig. S3C). In summary, the activation state of different  
312 signaling pathways comprised of proteins with >20% difference in abundance, allowed to  
313 significantly distinguish carboplatin responder from non-responder OvCa PDM models.

314

### 315 **Carboplatin treatment is associated with early induction of stress-response and** 316 **late apoptosis**

317

318 Next, we sought to investigate the carboplatin drug mode-of-action within OvCa PDM. Therefore,  
319 the carboplatin-responding OvCa PDM #24 was treated with carboplatin at a concentration of  
320 75  $\mu$ M, which had significantly induced PDM cytotoxicity (see Fig. 2C). Protein NFI signals were  
321 measured at three different time points and normalized to vehicle control. Proteins revealing  
322 >50% difference in TR signals (Fig. S4) were selected to focus on the strongest changes in  
323 abundance. Cell cycle progression proteins (phospho-CDK2, CDK1) and phospho-Histone H3  
324 (Ser10), affecting chromatin condensation during cell division, were downregulated quickly within  
325 30 minutes (Fig. 3B). After 4 h of treatment, TR signals of phospho-Aurora A/B/C protein and  
326 Histone H3 was strongly increased (Fig. S4). Longer incubation with carboplatin (72 h) resulted in  
327 strong downregulation of these proteins (Fig. 3B). Diminished abundance of cell cycle proteins  
328 after 72 h of carboplatin treatment differed significantly from vehicle control ( $P < 0.001$ ) and from  
329 early treatment (4 h;  $P < 0.001$ ). While levels of cell cycle related proteins decreased over time,  
330 apoptotic markers such as cleaved-Caspases as well as acetylated p53 were elevated after 72 h  
331 (Fig. S4). Induction of apoptosis-related proteins was already observed after 4 h of treatment (Fig.  
332 3B) with increasing abundances of cleaved Caspase 7 and acetylated p53 (Fig. S4). Focusing on  
333 down-stream PI3K/AKT/mTOR/Wnt pathway regulation, the abundances of mTOR effector  
334 proteins (S6RP, S6RP-phospho) were quickly upregulated after immediate (0.5 h) carboplatin  
335 treatment (Fig. S4), which is in line with previous reports about transcriptional regulation of stress  
336 response by the mTOR pathway<sup>26</sup>. We also observed additional elevation of mTOR pathway-  
337 related proteins after 4 h of carboplatin treatment. Furthermore, overactive mTOR signaling might  
338 have resulted in increased p53 activation through increased acetylated p53 levels (Fig. S4) as  
339 described before<sup>26</sup>. The PI3K/AKT/mTOR pathway was significantly upregulated within 4 h of  
340 carboplatin treatment compared to vehicle control ( $P = 0.021$ ; Fig. 3B). Similar to proteins related  
341 to cell cycle, this pathway was completely abrogated as compared to vehicle control after 72 h of  
342 treatment ( $P < 0.001$ ; Fig. 3B). Changes in protein abundance differed significantly during all  
343 three measured time points (0.5 h vs. 4 h:  $P = 0.003$ ; 4 h vs. 72 h and 0.5 h vs. 72 h:  $P < 0.001$   
344 Fig. 3B). Complete, significant downregulation of MAPK/RTK pathway occurred after 72 h of  
345 treatment ( $P = 0.017$ ; Fig. 3B). The proteomic changes within MAPK/RTK-related proteins over  
346 time were significant (0.5 h vs. 4 h:  $P = 0.009$ ; 4 h vs. 72 h:  $P < 0.001$ ; Fig. 3B). Thus, carboplatin  
347 treatment of OvCa #24 illustrated substantial and time-dependent changes in TR signals. Short  
348 treatment with carboplatin apparently triggered the induction of stress responses while longer  
349 treatment duration caused the induction of apoptosis.

350

### 351 **Metastasis-free-survival prolonged in carboplatin responder group**

352

353 To assess the predictive value of OvCa PDMs and obtained drug testing data, we compared  
354 metastasis-free-survival (MFS) between carboplatin responder (OvCa #17, #23-25) and non-  
355 responder (OvCa #19, #26) (Fig. S5). For this, OvCa PDM models were classified according to  
356 carboplatin-responses measured by PDM functional compound testing (Fig. S2). Following  
357 consideration of clinical follow-up patient data survival analyses revealed a significant difference  
358 between carboplatin responder and non-responder. Carboplatin-responder had a prolonged

359 median MFS of 494 days (16.2 month) versus 281 days (9.2 month) in non-responder. Thus,  
360 functional compound testing of OvCa PDM might enable treatment response prediction of  
361 platinum-based standard chemotherapy in corresponding ovarian cancer patients.

362  
363  
364  
365

### **Selumetinib responding OvCa PDM models display increased MAPK/RTK pathway activity**

366 HCL cluster analysis by Euclidean distance distinguishes selumetinib responder and non-  
367 responder OvCa PDM models by six clusters (Fig. S6A). By sorting these proteins according  
368 to pathway affiliation, selumetinib responder PDM models showed significantly increased  
369 MAPK pathway (e.g. Erk1/2) and RTK pathway proteins (e.g. PDGFR $\beta$ ) compared to non-  
370 responder PDM in line with previous reports from cell line-based studies <sup>27</sup> ( $P < 0.001$ ; Fig. 3C  
371 and Fig. S6B). Another protein cluster consisting of diverse pathway proteins such as the cell  
372 cycle, EMT markers or tumor markers showed significantly higher NFI signals compared to non-  
373 responder PDM models ( $P < 0.001$ ; Fig 3C and Fig. S6B). In contrast, one cluster was defined by  
374 increased NFI signals within non-responder PDM with significantly upregulated proteins related to  
375 cell cycle/DNA damage response (e.g. cleaved Caspases, phospho-CDK4), MAPK signaling  
376 (phospho-EGFR (Tyr1068)), PI3K/AKT signaling and associated pathways such STAT and Wnt  
377 signaling ( $P < 0.001$ ; Fig. 3C and Fig. S6C). Similar to previous cell line studies <sup>27,28</sup> we detected  
378 a number of potential selumetinib resistance features such as high levels of phospho-EGFR  
379 (Tyr1068) and an active PI3K/AKT pathway in non-responder PDM models. By grouping the  
380 proteins from HCL clustering according to pathway affiliation and abundance levels, we were able  
381 to distinguish responder from non-responder PDM models. Especially a more active MAPK/RTK  
382 pathway and a less active PI3K pathway allowed for the differentiation of responder from  
383 selumetinib-resistant, non-responder PDM models.

384  
385  
386  
387

### **Upregulation of MAPK/RTK and PI3K/AKT signaling pathways in response to selumetinib treatment as a potential resistance mechanism**

388 We next evaluated on- and off-target pathway effects by RPPA protein profiling of selumetinib-  
389 treated OvCa models to assess potential resistance mechanisms. As data were available from  
390 selumetinib responder (OvCa #17 and #21) and non-responder (OvCa #24) PDM models, protein  
391 abundances after treatment were compared for those groups. Protein abundances were  
392 measured as TR signals at three different treatment durations to track protein changes over time  
393 (Fig. 3D). Proteins with 100% differential mean TR signals between these groups were selected  
394 (Fig. S7-S9) and sorted according to pathway affiliation. While shortly after 4 h of treatment  
395 responder PDM models upregulated specific cell cycle and apoptosis proteins (Fig. 3D) incl.  
396 cleaved Caspase 7, phospho-CDK2 ( $P = 0.017$ ) and phospho-Histone H3 (Ser10) (Fig. S7), non-  
397 responder PDM models significantly upregulated cell cycle proteins after 72 h of treatment ( $P <$   
398  $0.001$ ; Fig. 3D). Proteins showing increased abundance are involved in G0/G1- and G2/M-cell  
399 cycle progression such as Aurora A, phospho-CDK4, phospho-CDK6, phospho-Rb, phospho-  
400 CDK2 (Fig. S7). In contrast to a progressing cell cycle within non-responder PDM models,  
401 selumetinib induced a cell cycle arrest and apoptosis in the responder PDM group accompanied  
402 by upregulation of phospho-CDK2 <sup>29</sup>, the effector cleaved Caspase 7 and p53 (Fig. S7). After 72  
403 h of treatment, analyses identified a significant difference in the activity of the MAPK/RTK  
404 pathway, which was directly affected by the treatment with the MEK1/2 inhibitor ( $P = 0.004$ ; Fig.  
405 3D). Treatment did not affect the MAPK/RTK pathway activity in the non-responder group.  
406 Instead, our data showed a time-dependent increase in MAPK/RTK activity (Fig. 3D, S8). In line  
407 with reports about the influence of PI3K/AKT/NF $\kappa$ B/Wnt signaling on resistance to selumetinib  
408 treatment in cell lines <sup>27,28,30</sup>, we detected a significant upregulation of proteins related to these  
409 pathways within the non-responding OvCa PDM after 4 h ( $P = 0.003$ ) and 72 h ( $P < 0.001$ ) of  
410 treatment (Fig. 3D, S9). Non-responder PDM models showed a downregulation of the AKT-  
411 inhibitor PTEN over time accompanied by increased phospho-AKT and Wnt signaling proteins  
412 such as  $\beta$ -catenin, phospho-GSK3 $\beta$  (Fig. S9). At the same time, PI3K/AKT/NF $\kappa$ B/Wnt signaling



413 proteins were substantially decreased following selumetinib treatment in responder PDM models  
414 (Fig. 3D). Thus, parallel upregulation of PI3K/AKT/NFκB/Wnt and MAPK/RTK signaling might  
415 illustrate a potential resistance mechanism in selumetinib non-responder OvCa PDM models.

416

#### 417 **Characterization of tumor-infiltrating lymphocyte populations from primary OvCa tissue** 418 **samples**

419

420 Our established procedure of tissue processing and PDM isolation enabled us to obtain single-  
421 cell suspensions containing tumor-infiltrating lymphocytes (TILs) from respective OvCa tumor  
422 specimen. This allowed for expansion of these autologous TILs in the presence of low-dosed  
423 cytokines and antigenic stimulation in order to investigate the immunogenicity of our patient  
424 samples. The immunogenicity of OvCa has been demonstrated in prior studies and is confirmed  
425 by the frequent infiltration of ovarian tumors with TILs<sup>31-33</sup>. As reported by Sato *et al.* (2005),  
426 different T cell populations diversely influence tumor immunosurveillance in OvCa. High  
427 intraepithelial CD8<sup>+</sup>/CD4<sup>+</sup> T cell ratios in patients were associated with improved survival as CD4<sup>+</sup>  
428 T cells executed immunosuppressive functions. To determine the composition of the isolated  
429 immune cell infiltrate within our sample cohort, we characterized the phenotype of autologous TIL  
430 populations by multi-color flow cytometry (Fig. S10A). Within isolated and expanded OvCa TIL  
431 populations from different specimen, we found that the proportion of CD4<sup>+</sup> TILs was 57.8% and  
432 significantly more abundant than CD8<sup>+</sup> TILs with 33.5% ( $P = 0.003^{**}$ ; Fig. 4A, Table S5). As  
433 higher CD8:CD4 ratios were previously correlated with better survival in OvCa patients<sup>31,33</sup>, the  
434 majority of patients in this cohort were characterized rather with an unfavorable prognosis (Fig.  
435 S10B).

436

437

#### 438 **Isolated CD8<sup>+</sup> OvCa TILs are comprised of tumor-specific CD39<sup>+</sup>, stem-like CD39<sup>+</sup>PD1<sup>+</sup> and** 439 **terminally differentiated CD39<sup>+</sup>PD1<sup>+</sup> populations**

440

441 Within the isolated CD8<sup>+</sup> TIL populations, we identified different phenotypes according to  
442 expression of the co-inhibitory receptors PD-1 and CTLA-4, the tumor-antigen specificity marker  
443 CD39 and the activation marker CD137 (Fig. 4A). To investigate the activation status of CD8<sup>+</sup>  
444 TILs, cells were examined for co-expression of the co-stimulatory receptor CD137 (4-1BB).  
445 CD137 is upregulated in activated T cells and has been suggested to be a marker for antigen-  
446 activated T cells<sup>34</sup>. The mean percentage of CD8<sup>+</sup> CD137<sup>+</sup> TILs was 3.1% and varied between 0-  
447 10% (Table S5). >5% of the CD8<sup>+</sup> cytotoxic T-cells (CTLs) from OvCa #1, #3 and #5 (Fig. S10B)  
448 co-expressed CD137 indicating their pre-exposure to tumor antigens. Expression of co-inhibitory  
449 receptors PD-1 and CTLA-4 on CD8<sup>+</sup> TILs did not differ significantly among analyzed TIL  
450 populations but tended to higher PD-1 expression levels (mean 6.9% vs. 3.4%; Table S5). TILs  
451 from OvCa #3, #7 and #25 as well as #5, #13 and #26 were among those displaying an  
452 exhausted phenotype with >10% of CD8<sup>+</sup>PD-1<sup>+</sup> or CD8<sup>+</sup>CTLA-4<sup>+</sup> TILs (Fig. S10). Moreover, in  
453 recent reports CD39 expression in CD8<sup>+</sup> TILs was described as a marker for tumor-antigen  
454 specific TILs that have undergone tumor-antigen-driven clonal expansion, exhibit resident  
455 memory T cell like phenotypes and express a variety of co-stimulatory and co-inhibitory receptors  
456<sup>35-37</sup>. Here, CD39<sup>+</sup> CTLs (mean 40.5%; range 4.4-96.8%, Table S5) were significantly  
457 more abundant than CD39<sup>-</sup> CTLs (mean 9.5%; range 0-48.3%, Table S5) so called 'bystander  
458 TILs' known to recognizing mostly viral antigens<sup>36</sup> ( $P < 0.001$ , Fig. 4A). The amount of CD39<sup>+</sup>  
459 TILs strongly correlated with the amount of CD8<sup>+</sup> TILs (Spearman  $r = 0.88$ , Fig. S10C;  $P < 0.001$ ,  
460 Table S6) and conversely with the amount of CD4<sup>+</sup> TILs (Spearman  $r = -0.80$ , Fig. S10C;  $P =$   
461 0.002, Table S6). Thus, the abundance of CD4<sup>+</sup> and CD8<sup>+</sup> TILs appeared to significantly  
462 determine the amount of CD39<sup>+</sup> CTLs. In addition, CD39 expression was largely limited to CD8<sup>+</sup>  
463 TILs. As co-inhibitory receptors play a role in T cell exhaustion and are important targets for  
464 immune checkpoint-inhibition, we analyzed PD-1 and CTLA-4 expression on the tumor-specific  
465 CD39<sup>+</sup> CTL population. PD1<sup>+</sup>CD39<sup>+</sup> were more frequent than CTLA-4<sup>+</sup> CD39<sup>+</sup> (15.7% vs. 5.4%  
466 Fig. 4A, Table S5). The total amount of CD8<sup>+</sup>PD1<sup>+</sup> TILs thereby correlated with the amount of

467 CD8<sup>+</sup>CD39<sup>+</sup>PD1<sup>+</sup> TILs (Spearman  $r = 0.79$ , Fig. S10C;  $P = 0.002$ , Table S6) of a PDM model.  
468 Thus, CD39 expression was limited to tumor-antigen stimulated and exhausted TILs (e.g. OvCa  
469 #7, #17 and #25; Fig. S10B). In contrast to 'terminally differentiated cells'<sup>38</sup>, OvCa TILs with a  
470 'stem cell-like' CD39<sup>+</sup>PD1<sup>+</sup> phenotype were found in 7.3% of the CTLs (Table S5). This population  
471 showed the highest proportional variability with a maximum of 50.5% cells vs. a minimum of 0%  
472 as compared to other CD8<sup>+</sup> TIL populations (CV 208%). The frequency of CD8<sup>+</sup>CD39<sup>+</sup> and stem  
473 cell-like CD8<sup>+</sup>CD39<sup>+</sup>PD1<sup>+</sup> was negatively correlated (Spearman  $r = -0.63$ , Fig. S10C;  $P = 0.024$ ,  
474 Table S6).

475

#### 476 **Specific TIL phenotypes isolated from OvCa tumor specimen correlate with regional lymph** 477 **node metastasis**

478

479 We further analyzed the correlation between specific TIL populations and clinical follow-up patient  
480 data. OvCa patients with regional lymph node metastasis (N = 1) tended to present with  
481 significantly more extensive CD8<sup>+</sup> TIL infiltration in their tumors than those with no lymph node  
482 metastasis (N = 0) ( $P = 0.016$ ) (Fig. 4B). As the frequency of CD8<sup>+</sup> TILs was shown to  
483 significantly correlate with that of CD8<sup>+</sup>CD39<sup>+</sup> TILs in OvCa (Fig. 4B), our data implicate a  
484 significant correlation between lymph node spread (N=1) and the presence of a CD8<sup>+</sup>CD39<sup>+</sup>  
485 population ( $P = 0.008$ ).

486

#### 487 **OvCa PDM killing by autologous TIL populations is enhanced by immune checkpoint** 488 **inhibitor treatment**

489

490 To evaluate the functional, tumor cell killing capacity of autologous TILs on OvCa PDM and the  
491 corresponding treatment efficacy of established immune checkpoint inhibitors (CPI), we subjected  
492 co-cultures of TILs and PDM from OvCa #24 and #26 to image-based analysis of  
493 CPI-treatment response. A total of nine PDM were imaged per treatment (3 PDM per well in  
494 triplicates) and a dead:live PDM ratio was calculated according to the sum of measured  
495 fluorescent intensities (FI) (Fig. 4C-E). Addition of TILs to autologous PDM induced a basal killing  
496 effect in PDM in both models analyzed in the absence of CPI treatment (Fig. 4D-E). For both co-  
497 culture models analyzed, the addition of CPI led to an increase in PDM cell death. Significantly  
498 higher killing effects in OvCa #24 co-cultures were observed in response to treatment with either  
499 the combination of anti-PD1 and anti-CTLA-4 (pembrolizumab + ipilimumab) or anti-PD-L1 and  
500 anti-CTLA-4 (atezolizumab + ipilimumab) ( $P = 0.039$ ) compared to isotype control treatment (Fig.  
501 4D). As the addition of isotype controls showed no additional effect in both co-culture models, we  
502 excluded the possibility of unspecific killing effects of CPI antibodies. CPI treatment almost  
503 doubled PDM killing in OvCa #26 (Fig. 4E). In comparison, co-cultures treated with ipilimumab ( $P$   
504  $= 0.004$ ) or atezolizumab ( $P < 0.001$ ) showed significant PDM killing compared to untreated PDM.  
505 The killing effect of TILs was significantly amplified by atezolizumab treatment as compared to co-  
506 culture controls (PDM+TIL:  $P = 0.021$ ; PDM+TIL+IgG4:  $P = 0.018$ ; Fig. 4E). Further,  
507 atezolizumab treatment significantly increased the TIL killing effect towards PDM as compared to  
508 pembrolizumab ( $P = 0.026$ ). Taken together, autologous TILs from both OvCa PDM models  
509 studied were composed of high amounts of tumor-specific, non-terminally differentiated  
510 CD8<sup>+</sup>CD39<sup>+</sup> TIL populations (Fig. S10B) inducing PDM killing. Especially TILs from OvCa #26  
511 responded with enhanced PDM killing to CPI treatment. Thus, co-culture assays of autologous  
512 TILs and PDM offer a platform to assess CPI treatment efficacies in a preclinical, patient-specific  
513 setting.

#### 514 **Discussion**

515

516 In the present study, we introduce a platform of PDM and autologous TILs extracted by limited  
517 enzymatic digestion from a panel of primary OvCa tissue specimen. Our results show a 70%  
518 success rate for isolation of PDM with robust viability and in suitable amounts for further, multi-  
519 parametric downstream analyses. In-depth histopathological assessment of PDM sections

520 confirmed the conservation of typical histological features of respective OvCa types by this model  
521 system. Importantly, the complexity of the ovarian cancer TME with respect to the presence of  
522 cancer-associated fibroblasts and extracellular matrix components incl. collagen and hyaluronan-  
523 binding protein observed in primary OvCa tissue sections was well reflected in PDM. The  
524 presence of these TME components has previously been correlated with tumor stage, prognosis,  
525 and progression and shown to substantially influence treatment responses<sup>17,39,40</sup>. Interestingly,  
526 we could also identify immune cell infiltration within a subset of OvCa PDM, reflecting the  
527 immunogenicity of OvCa as previously reported<sup>31,32,41</sup>.  
528 While OvCa patient-derived organoids (PDO) were often studied by genomic and transcriptomic  
529 sequencing<sup>42-44</sup>, we were the first (to our knowledge) to investigate inter-tumoral heterogeneity  
530 and differential drug response mechanism by RPPA-based protein profiling in a patient-derived  
531 3D OvCa preclinical model.  
532 Here, analyses of a panel of >110 phospho- and total proteins allowed for the clustering of  
533 histologically similar OvCa PDM models, pathway activity profiling and investigation of on- and off  
534 target drug effects. Obtained RPPA protein profiles confirmed the heterogeneity of OvCa PDM  
535 observed via immunohistochemistry and previously reported for HGSC, the most common type of  
536 OvCa. Our work identified significant differences in the activity of cell cycle and MAPK/RTK  
537 pathways within analyzed OvCa PDM and enabled their distinction from a breast cancer derived  
538 PDM model by differential expression of OvCa tumor and stem cell markers as well as apoptosis-  
539 related proteins.  
540 Seven OvCa PDM models were applied for individualized compound efficacy testing using a  
541 panel of clinically approved drugs at  $C_{max}$  drug concentrations previously reported in clinical trials.  
542 For analyzed OvCa PDM models, we observed patient-specific heterogeneity of response  
543 towards chemotherapy and targeted therapy. Correlation with RPPA protein profiling data allowed  
544 the allocation of individual PDM drug responses to specifically up- or down-regulated signaling  
545 pathway activities and, importantly, enabled the prediction of PDM models with high probability of  
546 response towards chemotherapy or targeted therapy.  
547 In accordance with the ability of cytostatic drugs to induce apoptosis especially in actively dividing  
548 cells<sup>45</sup>, our work identified additional correlation between proteins relevant for S- and G2/M- cell  
549 cycle phase progression and carboplatin response. Specifically, our data implicate that elevated  
550 abundances of Aurora A, Cyclin B1 and PCNA proteins may allow for identification of carboplatin  
551 treatment response. Furthermore and in line with previous reports, we confirmed that decreased  
552 DNA damage repair and the ability to undergo apoptosis<sup>46</sup> is associated with carboplatin  
553 treatment sensitivity in OvCa. This was illustrated by increased levels of cleaved Caspase-7 and  
554 cleaved PARP. Our results did not identify a correlation of carboplatin-resistance and markers of  
555 cancer stem cells (CSCs)<sup>47,48</sup> or epithelial-to-mesenchymal transition (EMT)<sup>49,50</sup>. Instead, we  
556 found the cancer stem cell-related protein Nanog as well N-Cadherin strongly upregulated in  
557 carboplatin responding PDM. These differing results might arise from the fact that above-  
558 mentioned previous studies were performed in adherent cell lines and not within a patient-derived  
559 3D tumor model. Importantly, we identified protein signatures of OvCa PDM allowing for the  
560 identification and prediction of PDM models with high probability of response towards  
561 chemotherapy or targeted therapy. Strikingly, our results showed a significant correlation of  
562 carboplatin treatment response with prolonged metastasis-free survival of respective patients.  
563 The targeted inhibition of MEK1/2 kinase by selumetinib induced cell death within different OvCa  
564 PDM models. Treatment responses to selumetinib have yet been clinically evaluated with a focus  
565 on LGSC patients, because of observable MAPK pathway activation in this type of OvCa.  
566 However, reported clinical response rates were limited. Nevertheless, different studies identified  
567 relationships between phospho-EGFR (Y1068) and phospho-Erk with selumetinib sensitivity  
568<sup>27,28,30,51</sup>. In line with this, our study identified selumetinib-sensitive PDM models by means of  
569 moderate MAPK/RTK pathway activity with increased abundance of Erk1/2, PDGFR and other  
570 proteins. Furthermore, our results imply a central role of active PI3K/AKT/mTOR signaling and  
571 upregulated caspase protein levels in selumetinib treatment resistance.  
572 We further assessed proteomic changes upon PDM treatment such as effects on protein  
573 abundance, directed on- and off-target pathway effects and drug mechanism-of-action within

574 OvCa PDM. In a carboplatin sensitive PDM model, we observed a time-dependent decrease in  
575 cell cycle- and an increase in apoptosis-inducing protein abundance. In parallel, we found a fast  
576 stress response upon treatment as indicated by an activated mTOR pathway with high S6RP and  
577 active phospho-S6RP levels<sup>26</sup>. Overactive mTOR in combination with cell stress and the inability  
578 of cells to adapt to cellular stress might be responsible for p53 elevation<sup>52,53</sup> and driving cells into  
579 senescence or apoptosis<sup>54,55</sup>. The degree of mTOR activation and the severity of stress in form  
580 of carboplatin-induced DNA damage might indicate the failure of PDM to induce protective  
581 responses and thus treatment-sensitivity.  
582 With the comparison of on- and off-target pathway effects in selumetinib-sensitive and –resistant  
583 OvCa PDM models, we uncovered significant changes in protein abundance for responder versus  
584 non-responder PDM models during treatment. In line with previous reports, on-target pathway  
585 effects of selumetinib treatment were characterized by a reduction in MAPK/RTK pathway protein  
586 levels accompanied by the induction of cell cycle arrest and apoptosis by high cleaved Caspase7,  
587 p53 and phospho-CDK2 levels<sup>29</sup>. Selumetinib treatment resistance was characterized on the one  
588 hand by MAPK feedback signaling with increased abundance of RTKs such as phospho-EGFR  
589 and upregulated AKT and Wnt-signaling by means of high phospho-AKT and  $\beta$ -catenin levels.  
590 Active PI3K/AKT/Wnt pathway signaling in OvCa PDM might indicate resistance to the MEK-  
591 inhibitor selumetinib as reported earlier<sup>27,28,30</sup>.  
592 Apart from testing the response of OvCa PDM to conventional therapy, we also applied  
593 immunophenotyping of autologous TIL populations followed by their co-culture with respective  
594 PDM for assessment of individualized responses towards immunotherapeutic mono- and  
595 combination treatment schedules. Immunosurveillance of cancer strongly depends on the  
596 composition of tumor-infiltrated immune cells and the degree of tumor tissue infiltration and is  
597 known to influence treatment efficacies. As a result, the idea of an immunoscore, identifying a  
598 patient's immunophenotype, emerged<sup>56</sup>. Our work uncovered several immunophenotypes within  
599 expanded TILs from OvCa patients by multicolor flow cytometry compared to previous  
600 immunohistochemistry based analysis<sup>57</sup>. As described by Sato *et al.* (2005)<sup>31</sup> and Zhang *et al.*  
601 (2003)<sup>32</sup> high numbers of intraepithelial CD8<sup>+</sup> TILs are associated with better prognosis in OvCa.  
602 We found that OvCa TILs were largely composed of CD4<sup>+</sup> rather than CD8<sup>+</sup> TILs. In this regard,  
603 OvCa models with high amounts of suppressive CD4<sup>+</sup> TILs and low numbers of CD8<sup>+</sup> TILs are  
604 suggested to have worse prognosis<sup>58</sup>. In line with previous reports<sup>59</sup>, we identified expression of  
605 CD39 in OvCa TIL populations, a marker that distinguishes between tumor-specific CTLs (CD39<sup>+</sup>)  
606 and bystander TILs (CD39<sup>-</sup>)<sup>35,36</sup>. Interestingly, we found that CD8<sup>+</sup> TIL amounts correlated with  
607 that of CD8<sup>+</sup> CD39<sup>+</sup> TILs, and could confirm that these tumor-specific T cells constitute an  
608 exhausted, memory T cell like phenotype, as CD39 expression was limited to CD8<sup>+</sup>PD-1<sup>+</sup> TILs.  
609 Importantly, our results further demonstrated that co-cultures of PDM and autologous TILs could  
610 be applied to assess the treatment effect of CPIs in a preclinical and patient-specific setting. Such  
611 PDM-TIL co-culture systems could potentially be used to identify OvCa patients, who would most  
612 likely benefit from immunotherapies. According to the data presented here, OvCa tumors with  
613 regional lymph node metastasis contained higher numbers of CD8<sup>+</sup> and CD8<sup>+</sup>CD39<sup>+</sup> TILs. The  
614 co-culture models tested in our study for response towards CPI treatment were derived from  
615 lymph-node spreading primary tumors, which might suggest that immunogenicity of OvCa  
616 increases upon metastasis.  
617 Limitations of our PDM model are currently the restricted number of PDM available from digestion  
618 of individual tumor tissue samples. From experience with different tumor types, an average of  
619 several hundred to several thousand microtumors can be isolated from fresh tissue samples. This  
620 number depends on the amount of tissue available for PDM isolation as well as tissue  
621 composition (including degree of fibrosis and necrosis). PDMs are therefore presently not suitable  
622 for high-throughput drug screening approaches, but for focused drug testing in late preclinical and  
623 translational drug development as well as in the context of precision oncology. Since PDM  
624 generally show a low proliferation rate in culture, passaging and propagation of these models is  
625 currently not feasible; at the same time, it should be considered that dissociation during  
626 passaging of PDM would probably dissolve their valuable tissue-like structure and would be



627 accordingly disadvantageous. Similar to patient-derived tumor organoids, PDM can be  
628 cryopreserved and thus applied in repetitive analyses.  
629 In line with the present study on OvCa PDM, our recent work on PDM established from human  
630 glioblastoma tissue specimen showed a good histopathological comparability of PDM with  
631 corresponding primary tumor tissue<sup>60,61</sup> and contained, among other components of the tumor  
632 stroma, tumor-associated macrophage populations, which are crucial for the response shown  
633 towards treatment with CSF1R and PD1 targeting antibodies<sup>60</sup>. The expansion of currently  
634 existing interactions with clinical centers will be of crucial importance for the further successful  
635 implementation of this test system in future applications of precision oncology.

636

## 637 **Materials and Methods**

638

### 639 **Human specimens**

640

641 Ovarian tumor samples were obtained from nineteen patients diagnosed with ovarian cancer  
642 undergoing surgery at the Center for Women's Health, University Hospital Tuebingen. Written  
643 informed consent was obtained from all participants. The tumors were classified according to  
644 International Federation of Gynecology and Obstetrics (FIGO) grading system. Tumor samples  
645 were delivered on the day of operation. The research project was approved by the ethics  
646 committee (IRB#275/2017BO2 and IRB#788/2018BO2).

647

### 648 **Isolation and cultivation of patient-derived microtumors and tumor-infiltrating**

#### 649 **Lymphocytes**

650

651 The procedure was adapted from Kondo et al. (2011) (Kondo, 2011 #200) and modified as  
652 follows. Tumor specimens were washed in HBSS (Gibco), minced with forceps, and digested with  
653 Liberase<sup>TM</sup> DH (Roche) for 2h at 37°C. Digested tissue was centrifuged (300g, 5 min), washed  
654 with HBSS and filtered through a stainless 500 µm steel mesh (VWR). The flow-through was  
655 again filtered through a 40 µm cell strainer (Corning). The filtrate containing the TIL fraction was  
656 resuspended in Advanced RPMI 1640 (Gibco) supplemented with 2 mM Glutamine (Gibco), 1%  
657 MEM Vitamins (Gibco), 5% human serum (Sigma-Aldrich) and 100 µg/ml primocin (Invivogen).  
658 IL-2 (100 U/ml), IL-7 (10 U/ml) and IL-15 (23.8 U/ml) (Peprotech) were freshly added to culture  
659 media. For expansion, CD3/CD28 dynabeads were added (Milteny Biotech). PDM, held back by  
660 cell strainer, were washed in HBSS and cultured in suspension in StemPro<sup>®</sup> hESC SFM (Gibco)  
661 supplemented with 8 ng/ml FGF-basic (Gibco), 0.1 mM β-mercaptoethanol (Gibco), 1.8% BSA  
662 (Gibco) and 100 µg/ml primocin (Invivogen) within cell-repellent culture dish (60x15 mm)  
663 (Corning).

664

### 665 **RPPA and protein data analysis**

666

667 Detailed methods of sample preparation and RPPA processing are provided in SI Materials.  
668 RPPA protein analysis and protein data processing was applied as reported before<sup>62-64</sup>. Detailed  
669 methods of sample preparation and RPPA processing are provided in SI Materials. From the  
670 arrays, PDM sample signals were extracted as protein-normalized, background-corrected mean  
671 fluorescence intensity (NFI), as measured from two technical sample replicates. NFI signals,  
672 median-centered for each protein over all measured samples (including OvCa PDM and BC PDM  
673 samples) and log2 transformed, reflect a measure for relative protein abundance. Small NFI  
674 protein signals at around blank assay level (0.02 NFI) were as a limiting quality criterion excluded  
675 from further analysis; otherwise all NFI signals were used for further protein data analysis. Protein  
676 heat maps were generated and cluster analysis (HCL) performed using the freely available  
677 MultiExperiment Viewer (MeV) software. For the comparison of protein profiles of treatment  
678 responders and non-responders (defined by functional compound testing; Fig. 3C, Fig. S2), only  
679 proteins with a >20% difference between the means were used for analysis. On- and off-target  
680 pathway effects were evaluated from one biological and two technical replicate samples per



681 model at three different treatment times (0.5, 4 and 72 h). Treated sample to respective DMSO  
682 vehicle control NFI ratios (TR) were calculated for each treatment condition and log<sub>2</sub>-  
683 transformed.

684 If possible, the protein abundances were shown as mean of responder/non-responder or both  
685 (analyzed beforehand by functional compound testing; Fig. 2C). A treatment-specific threshold of  
686 protein change (carboplatin: minimum 50% difference; selumetinib: minimum 100% difference)  
687 was set. Only proteins showing treatment effects above the threshold were shown.

688  
689

#### 690 **Efficacy of compounds validated in PDM cultures**

691

692 Efficacy of compounds was validated by applying the real-time CellTox™ Green Cytotoxicity  
693 assay (Promega). Assays were performed according to manufacturer's protocol. PDM were  
694 cultured a maximum of 1-2 weeks in PDM culture medium prior testing. Per treatment three to  
695 eight replicates were performed using n = 15 PDM per replicate in a total volume of 150 µl  
696 phenol-red free PDM culture medium. Cell death was measured as relative fluorescent unit (RFU)  
697 (485–500 nm Ex / 520–530 nm Em), relative to the number of dead, permeable cells after 24h,  
698 48h and 72h with the Envision Multilabel Plate Reader 2102 and Tecan Spark Multimode Plate  
699 Reader. RFU values were normalized to DMSO control or H<sub>2</sub>O control according to used drug  
700 solvent. Treatment effects were measured as fold change (FC) compared to control. Differences  
701 between treated PDM and untreated PDM were calculated as fold change values separately for  
702 each time point. Statistical significance was evaluated by two-way ANOVA multiple comparison  
703 test. Outliers were identified with the Iglewicz and Hoaglin's robust test for multiple outliers  
704 applying a recommended Z-score of  $\geq 3.5$ <sup>65</sup>.

705

#### 706 **Statistical analysis**

707

708 Statistical analysis was performed using GraphPad Prism. For Boxplot data, whiskers represent  
709 quartiles with minimum and maximum values and the median. Datasets with no clear normal  
710 distribution were analyzed with unpaired, two-tailed Mann-Whitney-U-test, otherwise as indicated.  
711 Correlation data were evaluated by Spearmans rank correlation. For all analyses, *P* values < 0.05  
712 were considered statistically significant. Recommended post-hoc tests were applied for multiple  
713 comparisons.

714

#### 715 **Data and materials availability**

716

717 All data and materials are available upon request after signature of an MTA from the  
718 corresponding authors.

719

#### 720 **Acknowledgments**

721

722 We gratefully acknowledge the Department of Women's Health, Women's University Hospital,  
723 Tuebingen University Hospital for excellent support, helpful discussions and providing fresh tumor  
724 tissue biopsies and corresponding FFPE material. We thank all patients and healthy volunteers  
725 enrolled for giving their informed consent for secondary use of residual tissue, respectively. The  
726 use of human samples was approved by the local ethics commission at the Medical Faculty of  
727 Tuebingen under IRB#275/2017BO2 and IRB#788/2018BO2. This study was funded by the  
728 Ministry of Baden-Wuerttemberg for Economic Affairs, Labor and Tourism (3-4332.62-HSG/84).

729

#### 730 **Author Contributions**

731

732 Conceptualization: N.A, C.S, M.P, K.SL, S.Y.B, A.H,

733 Methodology: N.A, B.G, M.P, AL.K

734 Investigation: N.A, B.G, M.P, A.K, AL.K, A.S, S.Y.B,

735 Project administration: N.A, C.S, A.K  
736 Supervision: C.S, A.K  
737 Writing – original draft: N.A, C.S  
738 Writing – review & editing: N.A, C.S, M.P, AL.K, K.SL, A.K, S.Y.B, A.H, A.S  
739

#### 740 **Competing Interest Statement**

741 Andreas Hartkopf received consulting and speaking fees from GSK, AstraZeneca and Clovis.  
742 Nicole Anderle, André Koch, Berthold Gierke, Anna-Lena Keller, Annette Staebler, Sara Y.  
743 Brucker, Michael Pawlak, Katja Schenke-Layland and Christian Schmees report no conflicts of  
744 interest.

#### 745 746 **References**

- 747
- 748 1 Surveillance, Epidemiology and End Results (SEER) Program ([www.seer.cancer.gov](http://www.seer.cancer.gov))  
749 SEER\*Stat Database: Incidence - SEER Research Data, 9 Registries, Nov 2020 Sub  
750 (1975-2018) - Linked To County Attributes - Time Dependent (1990-2018)  
751 Income/Rurality, 1969-2019 Counties, National Cancer Institute, DCCPS, Surveillance  
752 Research Program, released April 2021, based on the November 2020 submission.  
753 (National Cancer Institute, Bethesda, MD).
  - 754 2 Zhang, H. *et al.* Integrated Proteogenomic Characterization of Human High-Grade  
755 Serous Ovarian Cancer. *Cell* **166**, 755-765, doi:10.1016/j.cell.2016.05.069 (2016).
  - 756 3 Neal, J. T. *et al.* Organoid Modeling of the Tumor Immune Microenvironment. *Cell* **175**,  
757 1972-1988.e1916, doi:10.1016/j.cell.2018.11.021 (2018).
  - 758 4 Wensink, G. E. *et al.* Patient-derived organoids as a predictive biomarker for treatment  
759 response in cancer patients. *npj Precision Oncology* **5**, doi:10.1038/s41698-021-00168-1  
760 (2021).
  - 761 5 Kondo, J. *et al.* Retaining cell-cell contact enables preparation and culture of spheroids  
762 composed of pure primary cancer cells from colorectal cancer. *Proc. Natl. Acad. Sci. U.*  
763 *S. A.* **108**, 6235-6240, doi:10.1073/pnas.1015938108 (2011).
  - 764 6 Köbel, M. *et al.* An Immunohistochemical Algorithm for Ovarian Carcinoma Typing. *Int. J.*  
765 *Gynecol. Pathol.* **35**, 430-441, doi:10.1097/pgp.0000000000000274 (2016).
  - 766 7 Hilliard, T. The Impact of Mesothelin in the Ovarian Cancer Tumor Microenvironment.  
767 *Cancers (Basel)* **10**, 277, doi:10.3390/cancers10090277 (2018).
  - 768 8 Hassan, R., Kreitman, R. J., Pastan, I. & Willingham, M. C. Localization of Mesothelin in  
769 Epithelial Ovarian Cancer. *Appl. Immunohistochem. Mol. Morphol.* **13**, 243-247,  
770 doi:10.1097/01.pai.00000141545.36485.d6 (2005).
  - 771 9 Chang, M.-C. *et al.* Mesothelin enhances invasion of ovarian cancer by inducing MMP-7  
772 through MAPK/ERK and JNK pathways. *Biochem. J.* **442**, 293-302,  
773 doi:10.1042/bj20110282 (2012).
  - 774 10 Tornos, C. *et al.* Expression of WT1, CA 125, and GCDFFP-15 as useful markers in the  
775 differential diagnosis of primary ovarian carcinomas versus metastatic breast cancer to  
776 the ovary. *Am. J. Surg. Pathol.* **29**, 1482-1489,  
777 doi:10.1097/01.pas.0000176429.88702.36 (2005).
  - 778 11 Kriplani, D. & Patel, M. M. Immunohistochemistry: A diagnostic aid in differentiating  
779 primary epithelial ovarian tumors and tumors metastatic to the ovary. *South Asian Journal*  
780 *of Cancer* **02**, 254-258, doi:10.4103/2278-330x.119888 (2013).
  - 781 12 Neunteufel, W. & Breitenacker, G. Tissue expression of CA 125 in benign and malignant  
782 lesions of ovary and fallopian tube: a comparison with CA 19-9 and CEA. *Gynecol.*  
783 *Oncol.* **32**, 297-302, doi:10.1016/0090-8258(89)90628-8 (1989).
  - 784 13 Cox, T. R. The matrix in cancer. *Nature Reviews Cancer* **21**, 217-238,  
785 doi:10.1038/s41568-020-00329-7 (2021).

- 786 14 Bhat, R. & Bissell, M. J. Of plasticity and specificity: dialectics of the microenvironment  
787 and macroenvironment and the organ phenotype. *WIREs Developmental Biology* **3**, 147-  
788 163, doi:10.1002/wdev.130 (2014).
- 789 15 Roskelley, C. D. & Bissell, M. J. The dominance of the microenvironment in breast and  
790 ovarian cancer. *Semin. Cancer Biol.* **12**, 97-104, doi:10.1006/scbi.2001.0417 (2002).
- 791 16 Mhawech-Fauceglia, P. *et al.* Stromal Expression of Fibroblast Activation Protein Alpha  
792 (FAP) Predicts Platinum Resistance and Shorter Recurrence in patients with Epithelial  
793 Ovarian Cancer. *Cancer Microenviron.* **8**, 23-31, doi:10.1007/s12307-014-0153-7 (2015).
- 794 17 Nissen, N. I., Karsdal, M. & Willumsen, N. Collagens and Cancer associated fibroblasts in  
795 the reactive stroma and its relation to Cancer biology. *J. Exp. Clin. Cancer Res.* **38**, 115,  
796 doi:10.1186/s13046-019-1110-6 (2019).
- 797 18 Saha, P. & Datta, K. Multi-functional, multicompartmental hyaluronan-binding protein 1  
798 (HABP1/p32/gC1qR): implication in cancer progression and metastasis. *Oncotarget* **9**,  
799 10784-10807, doi:10.18632/oncotarget.24082 (2018).
- 800 19 Longacre, M. *et al.* A Comparative Analysis of Genetic and Epigenetic Events of Breast  
801 and Ovarian Cancer Related to Tumorigenesis. *Int. J. Mol. Sci.* **17**, 759,  
802 doi:10.3390/ijms17050759 (2016).
- 803 20 Iyengar, M. *et al.* CDK4/6 inhibition as maintenance and combination therapy for high  
804 grade serous ovarian cancer. *Oncotarget* **9**, 15658-15672,  
805 doi:10.18632/oncotarget.24585 (2018).
- 806 21 Farley, J. *et al.* Selumetinib in women with recurrent low-grade serous carcinoma of the  
807 ovary or peritoneum: an open-label, single-arm, phase 2 study. *The Lancet Oncology* **14**,  
808 134-140, doi:10.1016/s1470-2045(12)70572-7 (2013).
- 809 22 McGivern, N. *et al.* Activation of MAPK signalling results in resistance to saracatinib  
810 (AZD0530) in ovarian cancer. *Oncotarget* **9**, 4722-4736, doi:10.18632/oncotarget.23524  
811 (2018).
- 812 23 Liston, D. R. & Davis, M. Clinically Relevant Concentrations of Anticancer Drugs: A Guide  
813 for Nonclinical Studies. *Clin. Cancer. Res.* **23**, 3489-3498, doi:10.1158/1078-0432.CCR-  
814 16-3083 (2017).
- 815 24 Ovejero, S., Bueno, A. & Sacristán, M. P. Working on Genomic Stability: From the S-  
816 Phase to Mitosis. *Genes* **11**, 225, doi:10.3390/genes11020225 (2020).
- 817 25 Holder, J., Poser, E. & Barr, F. A. Getting out of mitosis: spatial and temporal control of  
818 mitotic exit and cytokinesis byPP1 andPP2A. *FEBS Lett.* **593**, 2908-2924,  
819 doi:10.1002/1873-3468.13595 (2019).
- 820 26 Aramburu, J., Ortells, M. C., Tejedor, S., Buxadé, M. & López-Rodríguez, C.  
821 Transcriptional regulation of the stress response by mTOR. *Science Signaling* **7**, re2,  
822 doi:10.1126/scisignal.2005326 (2014).
- 823 27 Dry, J. R. *et al.* Transcriptional Pathway Signatures Predict MEK Addiction and Response  
824 to Selumetinib (AZD6244). *Cancer Res.* **70**, 2264-2273, doi:10.1158/0008-5472.can-09-  
825 1577 (2010).
- 826 28 Fernandez, M. L. *et al.* Markers of MEK inhibitor resistance in low-grade serous ovarian  
827 cancer: EGFR is a potential therapeutic target. *Cancer Cell Int.* **19**, 10,  
828 doi:10.1186/s12935-019-0725-1 (2019).
- 829 29 Megyesi, J., Tarcsafalvi, A., Seng, N., Hodeify, R. & Price, P. Cdk2 phosphorylation of  
830 Bcl-xL after stress converts it to a pro-apoptotic protein mimicking Bax/Bak. *Cell Death*  
831 *Discovery* **2**, 15066, doi:10.1038/cddiscovery.2015.66 (2016).
- 832 30 Garon, E. B. *et al.* Identification of Common Predictive Markers of In vitro Response to  
833 the Mek Inhibitor Selumetinib (AZD6244; ARRY-142886) in Human Breast Cancer and  
834 Non-Small Cell Lung Cancer Cell Lines. *Mol. Cancer Ther.* **9**, 1985-1994,  
835 doi:10.1158/1535-7163.mct-10-0037 (2010).
- 836 31 Sato, E. *et al.* Intraepithelial CD8+ tumor-infiltrating lymphocytes and a high  
837 CD8+/regulatory T cell ratio are associated with favorable prognosis in ovarian cancer.  
838 *Proc. Natl. Acad. Sci. U. S. A.* **102**, 18538-18543, doi:10.1073/pnas.0509182102 (2005).

- 839 32 Zhang, L. *et al.* Intratumoral T Cells, Recurrence, and Survival in Epithelial Ovarian  
840 Cancer. *New Engl. J. Med.* **348**, 203-213, doi:10.1056/nejmoa020177 (2003).
- 841 33 Hamanishi, J. *et al.* Programmed cell death 1 ligand 1 and tumor-infiltrating CD8+ T  
842 lymphocytes are prognostic factors of human ovarian cancer. *Proceedings of the National*  
843 *Academy of Sciences* **104**, 3360-3365, doi:10.1073/pnas.0611533104 (2007).
- 844 34 Ye, Q. *et al.* CD137 Accurately Identifies and Enriches for Naturally Occurring Tumor-  
845 Reactive T Cells in Tumor. *Clin. Cancer Res.* **20**, 44-55, doi:10.1158/1078-0432.ccr-13-  
846 0945 (2014).
- 847 35 Duhen, T. *et al.* Co-expression of CD39 and CD103 identifies tumor-reactive CD8 T cells  
848 in human solid tumors. *Nat Commun* **9**, 2724, doi:10.1038/s41467-018-05072-0 (2018).
- 849 36 Simoni, Y. *et al.* Bystander CD8+ T cells are abundant and phenotypically distinct in  
850 human tumour infiltrates. *Nature* **557**, 575-579, doi:10.1038/s41586-018-0130-2 (2018).
- 851 37 Canale, F. P. *et al.* CD39 Expression Defines Cell Exhaustion in Tumor-Infiltrating  
852 CD8+T Cells. *Cancer Res.* **78**, 115-128, doi:10.1158/0008-5472.can-16-2684 (2018).
- 853 38 Jansen, C. S. *et al.* An intra-tumoral niche maintains and differentiates stem-like CD8 T  
854 cells. *Nature* **576**, 465-470, doi:10.1038/s41586-019-1836-5 (2019).
- 855 39 Yu, G. & Wang, J. Significance of hyaluronan binding protein (HABP1/P32/gC1qR)  
856 expression in advanced serous ovarian cancer patients. **94**, 210-215,  
857 doi:10.1016/j.yexmp.2012.06.007 (2013).
- 858 40 Yu, H. *et al.* Elevated expression of hyaluronic acid binding protein 1  
859 (HABP1)/P32/C1QBP is a novel indicator for lymph node and peritoneal metastasis of  
860 epithelial ovarian cancer patients. *Tumor Biol.* **34**, 3981-3987, doi:10.1007/s13277-013-  
861 0986-6 (2013).
- 862 41 Barnett, B., Kryczek, I., Cheng, P., Zou, W. & Curiel, T. J. Regulatory T cells in ovarian  
863 cancer: biology and therapeutic potential. *Am. J. Reprod. Immunol.* **54**, 369-377,  
864 doi:10.1111/j.1600-0897.2005.00330.x (2005).
- 865 42 Chen, H. *et al.* Short-term organoid culture for drug sensitivity testing of high-grade  
866 serous carcinoma. *Gynecol. Oncol.* **157**, 783-792, doi:10.1016/j.ygyno.2020.03.026  
867 (2020).
- 868 43 Kopper, O. *et al.* An organoid platform for ovarian cancer captures intra- and interpatient  
869 heterogeneity. *Nat. Med.* **25**, 838-849, doi:10.1038/s41591-019-0422-6 (2019).
- 870 44 Hill, S. J. *et al.* Prediction of DNA Repair Inhibitor Response in Short-Term Patient-  
871 Derived Ovarian Cancer Organoids. *Cancer Discov.* **8**, 1404-1421, doi:10.1158/2159-  
872 8290.CD-18-0474 (2018).
- 873 45 Valeriote, F. & van Putten, L. Proliferation-dependent cytotoxicity of anticancer agents: a  
874 review. *Cancer Res.* **35**, 2619-2630 (1975).
- 875 46 Vasey, P. A. Resistance to chemotherapy in advanced ovarian cancer: mechanisms and  
876 current strategies. *Br. J. Cancer* **89**, 23-28, doi:10.1038/sj.bjc.6601497 (2003).
- 877 47 Haygood, C. L. W. Ovarian cancer stem cells: Can targeted therapy lead to improved  
878 progression-free survival? *World Journal of Stem Cells* **6**, 441, doi:10.4252/wjsc.v6.i4.441  
879 (2014).
- 880 48 Bapat, S. A., Mali, A. M., Koppikar, C. B. & Kurrey, N. K. Stem and Progenitor-Like Cells  
881 Contribute to the Aggressive Behavior of Human Epithelial Ovarian Cancer. *Cancer Res.*  
882 **65**, 3025-3029, doi:10.1158/0008-5472.can-04-3931 (2005).
- 883 49 Deng, J. *et al.* Targeting epithelial-mesenchymal transition and cancer stem cells for  
884 chemoresistant ovarian cancer. *Oncotarget* **7**, 55771-55788,  
885 doi:10.18632/oncotarget.9908 (2016).
- 886 50 Liu, S. *et al.* NANOG regulates epithelial-mesenchymal transition and chemoresistance  
887 through activation of the STAT3 pathway in epithelial ovarian cancer. *Tumor Biol.* **37**,  
888 9671-9680, doi:10.1007/s13277-016-4848-x (2016).
- 889 51 Balmanno, K., Chell, S. D., Gillings, A. S., Hayat, S. & Cook, S. J. Intrinsic resistance to  
890 the MEK1/2 inhibitor AZD6244 (ARRY-142886) is associated with weak ERK1/2  
891 signalling and/or strong PI3K signalling in colorectal cancer cell lines. *Int. J. Cancer* **125**,  
892 2332-2341, doi:10.1002/ijc.24604 (2009).

- 893 52 Lee, C. H. *et al.* Constitutive mTOR activation in TSC mutants sensitizes cells to energy  
894 starvation and genomic damage via p53. *The EMBO journal* **26**, 4812-4823,  
895 doi:10.1038/sj.emboj.7601900 (2007).
- 896 53 Vadysirisack, D. D., Baenke, F., Ory, B., Lei, K. & Ellisen, L. W. Feedback control of p53  
897 translation by REDD1 and mTORC1 limits the p53-dependent DNA damage response.  
898 *Mol. Cell. Biol.* **31**, 4356-4365, doi:10.1128/mcb.05541-11 (2011).
- 899 54 Leontieva, O. V. & Blagosklonny, M. V. DNA damaging agents and p53 do not cause  
900 senescence in quiescent cells, while consecutive re-activation of mTOR is associated  
901 with conversion to senescence. *Aging (Albany NY)* **2**, 924-935,  
902 doi:10.18632/aging.100265 (2010).
- 903 55 Astle, M. V. *et al.* AKT induces senescence in human cells via mTORC1 and p53 in the  
904 absence of DNA damage: implications for targeting mTOR during malignancy. *Oncogene*  
905 **31**, 1949-1962, doi:10.1038/onc.2011.394 (2012).
- 906 56 Gajewski, T. F., Schreiber, H. & Fu, Y.-X. Innate and adaptive immune cells in the tumor  
907 microenvironment. *Nat. Immunol.* **14**, 1014-1022, doi:10.1038/ni.2703 (2013).
- 908 57 Hwang, W. T., Adams, S. F., Tahirovic, E., Hagemann, I. S. & Coukos, G. Prognostic  
909 significance of tumor-infiltrating T cells in ovarian cancer: a meta-analysis. *Gynecol.*  
910 *Oncol.* **124**, 192-198, doi:10.1016/j.ygyno.2011.09.039 (2012).
- 911 58 Curiel, T. J. *et al.* Specific recruitment of regulatory T cells in ovarian carcinoma fosters  
912 immune privilege and predicts reduced survival. *Nat. Med.* **10**, 942-949,  
913 doi:10.1038/nm1093 (2004).
- 914 59 Leem, G. *et al.* 4-1BB co-stimulation further enhances anti-PD-1-mediated reinvigoration  
915 of exhausted CD39<sup>+</sup> CD8 T cells from primary and metastatic sites of  
916 epithelial ovarian cancers. *Journal for ImmunoTherapy of Cancer* **8**, e001650,  
917 doi:10.1136/jitc-2020-001650 (2020).
- 918 60 Przystal, J. M. *et al.* Targeting CSF1R Alone or in Combination with PD1 in Experimental  
919 Glioma. *Cancers (Basel)* **13**, 2400, doi:10.3390/cancers13102400 (2021).
- 920 61 Walter, B. *et al.* Argyrin F Treatment-Induced Vulnerabilities Lead to a Novel Combination  
921 Therapy in Experimental Glioma. *Advanced Therapeutics*, 2100078,  
922 doi:10.1002/adtp.202100078 (2021).
- 923 62 Pirnia, F. *et al.* Novel functional profiling approach combining reverse phase protein  
924 microarrays and human 3-D ex vivo tissue cultures: expression of apoptosis-related  
925 proteins in human colon cancer. *Proteomics* **9**, 3535-3548, doi:10.1002/pmic.200800159  
926 (2009).
- 927 63 Pawlak, M. & Carragher, N. O. Reverse Phase Protein Arrays elucidate mechanisms-of-  
928 action and phenotypic response in 2D and 3D models. *Drug Discovery Today:*  
929 *Technologies* **23**, 7-16, doi:10.1016/j.ddtec.2017.05.002 (2017).
- 930 64 Kresbach, G. M. & Pawlak, M. High Precision RPPA: Concept, Features, and Application  
931 Performance of the Integrated Zeptosens Platform. *Adv. Exp. Med. Biol.* **1188**, 31-59,  
932 doi:10.1007/978-981-32-9755-5\_3 (2019).
- 933 65 Iglewicz, B. & Hoaglin, D. C. *How to detect and handle outliers.* (Milwaukee, Wis. :  
934 ASQC Quality Press, 1993).

935

936

937

938

939

940



941 **Figures and Tables**

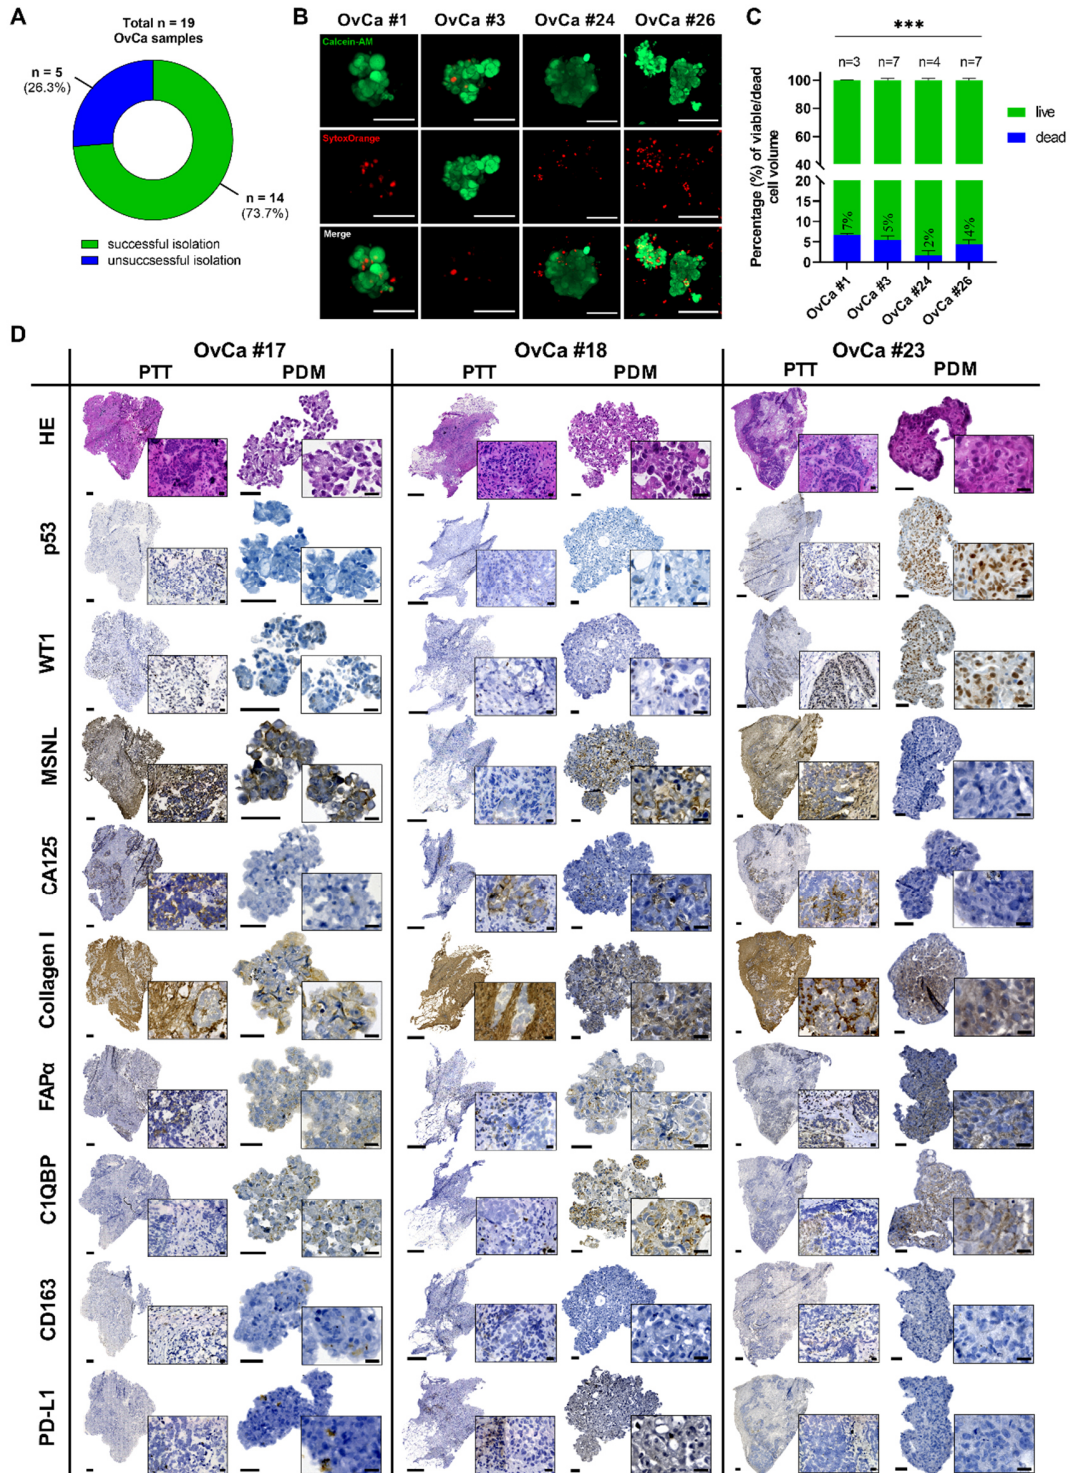

942  
943

944 **Figure 1. Patient-derived 3D microtumors (PDM) derived from primary OvCa tumor**  
945 **specimen show high viability and resemble histopathological features of the**  
946 **corresponding PTT. (A)** Efficiency of isolating OvCa PDM from a total of  $n = 19$  fresh primary  
947 OvCa tumor tissues samples. PDM gained from  $n = 14$  specimen with a success rate of 73.7%.  
948 **(B)** Viability of OvCa PDM models. Exemplary 2D images from 3D projections of  $n = 4$  OvCa  
949 PDM models confirm high viability according to Calcein-AM (viable cells) and SYTOX™ Orange  
950 (dead cells) staining. **(C)** Percentage of viable and dead cells in OvCa PDM. Viability was  
951 assessed by an image-based analysis (see SI Methods) in  $n = 4$  OvCa PDM models shown in  
952 (B). Data are shown as mean values with SEM from at least  $n = 3$  PDM of each model.  $*P < 0.05$ ,  
953  $**P < 0.01$ ,  $***P < 0.001$ , multiple paired t-test with Holm-Šídák's post hoc test. Scale bar 50  $\mu\text{m}$ .  
954 **(D)** Hematoxylin and Eosin (H&E) as well as immunohistochemical staining of OvCa PDM and  
955 corresponding primary tumor tissue (PTT) sections. H&E stainings revealed features of malignant  
956 cells (incl. giant cells with more than one nucleolus, hyperchromatic cells and high  
957 nuclei:cytoplasm ratio) confirming the cancerous origin. Scale bars indicate 500  $\mu\text{m}$  for PTT; 50  
958  $\mu\text{m}$  for PDM; 20  $\mu\text{m}$  for magnifications (PTT and PDM). FAP $\alpha$ , cancer-associated fibroblast  
959 protein alpha; C1QBP, hyaluronan binding protein; WT1, wilms tumor 1; MSNL, mesothelin.

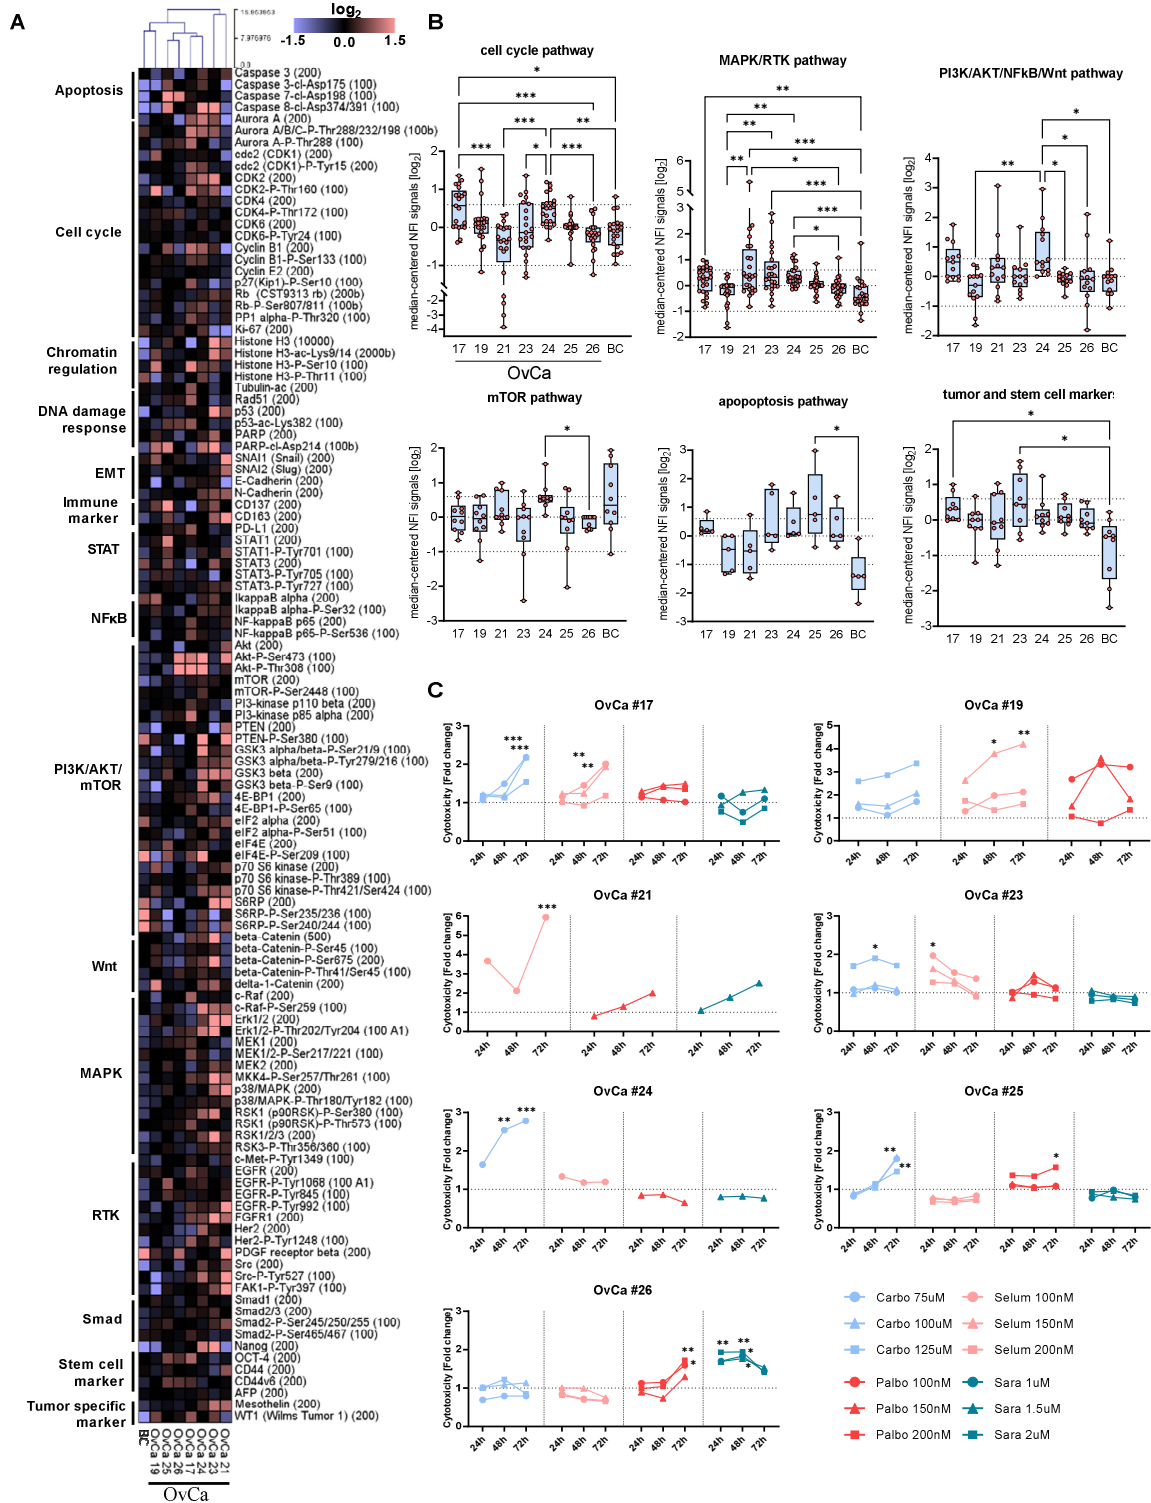

961 **Figure 2. RPPA protein profiling of OvCa PDM identifies significant differences in active**  
962 **protein signaling pathways as molecular basis for OvCa PDM drug treatment responses.**  
963 (A) Protein heat map covering 116 analytes analyzed in OvCa PDM ( $n = 7$ ) and BC PDM ( $n = 1$ )  
964 generated from sample sizes of  $n = 100-150$  PDM. Protein abundances for each analyte are  
965 displayed as median-centered,  $\log_2$ -transformed NFI signals. Samples were subjected to  
966 hierarchical clustering using Euclidean distance (complete linkage). (B) Activation state of  
967 different pathways in the different OvCa PDM models. Proteins related to an “active” pathway  
968 were selected for each of the plotted pathways (see Table S4). Protein signals are shown as  
969 median-centered,  $\log_2$  transformed NFI signals. Dotted lines indicate  $\log_2$  values of +0.6 (fold  
970 change of +1.5) and  $-1 \log_2$  (fold change of -0.5). Data are shown as box and whiskers plots with  
971 minimum and maximum range. \* $P < 0.05$ , \*\* $P < 0.01$ , \*\*\* $P < 0.001$ , Kruskal-Wallis test with  
972 Dunn’s post hoc test. (C) Cytotoxicity measurement of OvCa PDM treated with standard  
973 platinum-based chemotherapy (carbo 75-125  $\mu\text{M}$ ) and/or targeted therapy (selum 100-200 nM,  
974 palbo 100-200 nM, sara 1-2  $\mu\text{M}$ ). Four replicates per treatment with  $n = 15$  PDM per well were  
975 performed and measured after 24 h, 48 h and 72 h. Signals were measured as RFU (Relative  
976 Fluorescent Unit), background corrected and normalized to vehicle control (DMSO). In case of  
977 palbociclib to H<sub>2</sub>O control. Data are shown as mean values. Statistical significances compared to  
978 vehicle control or H<sub>2</sub>O are shown. \* $P < 0.05$ , \*\* $P < 0.01$ , \*\*\* $P < 0.001$ , Two-way ANOVA with  
979 Bonferroni’s multiple comparison test. Carbo: carboplatin; Selum: selumetinib; Palbo: palbociclib;  
980 Sara: saracatenib  
981  
982

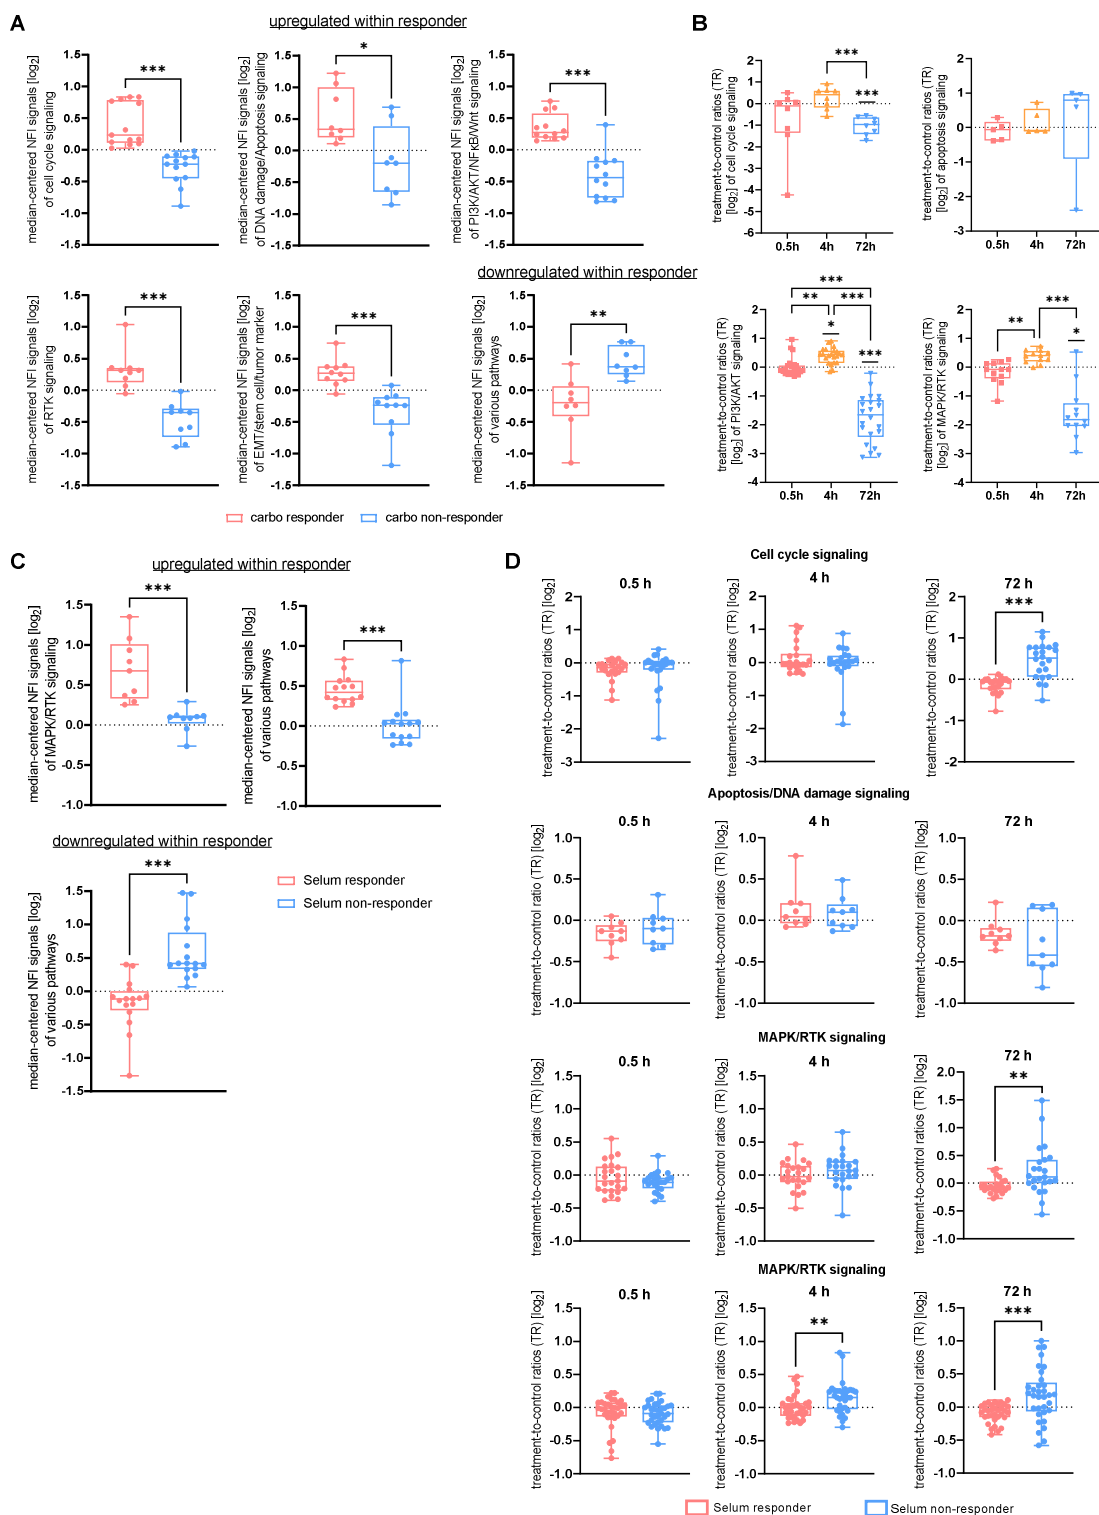

983  
984



985 **Figure 3. Carboplatin and selumetinib drug response in OvCa PDM correlates with the**  
986 **activity of diverse signaling pathways. (A, C)** Signaling pathway activation in carboplatin (A)  
987 and selumetinib (C) responder vs. non-responder OvCa PDM. Proteins were sorted according to  
988 their pathway affiliation and according to upregulation or downregulation within responder group.  
989 \* $P < 0.05$ , \*\* $P < 0.01$ , \*\*\* $P < 0.001$ , Mann-Whitney-U-test. R, responder; Non-R, Non-responder.  
990 (B, D) Proteomic on- and off-target pathway effects in carboplatin- and selumetinib-treated OvCa  
991 PDM analyzed by RPPA. Treated PDM were analyzed from an immediate (0.5 h), an early (4 h)  
992 and a late (72 h) treatment time. For each time point, protein values are displayed as log<sub>2</sub>-  
993 transformed treatment-to-control signal ratios (TR) calculated from NFI signals of treated PDM  
994 and corresponding vehicle control (DMSO). (B) OvCa #24 PDM were treated with 75 μM  
995 carboplatin. Only proteins with >50% differential protein abundance compared to vehicle control  
996 were selected, sorted according to pathway affiliation and plotted as box whisker plots. Significant  
997 differences between time points and vehicle control were measured. Straight lines above plots  
998 indicate statistical significances compared to vehicle control. \* $P < 0.05$ , \*\* $P < 0.01$ , \*\*\* $P < 0.001$ ,  
999 One-way ANOVA using nonparametric Kruskal-Wallis with Dunn's ad hoc test. (D) Proteomic on-  
1000 and off-target pathway effects in selumetinib (100 nM) treated PDM. Selumetinib responder and  
1001 non-responder PDM models were grouped. Only proteins with greater than 100% differential  
1002 protein abundance between responder and non-responder PDM models were plotted according  
1003 to signaling pathway affiliation. \* $P < 0.05$ , \*\* $P < 0.01$ , \*\*\* $P < 0.001$ , Mann-Whitney U-test.

1004  
1005  
1006  
1007  
1008  
1009  
1010  
1011  
1012  
1013  
1014

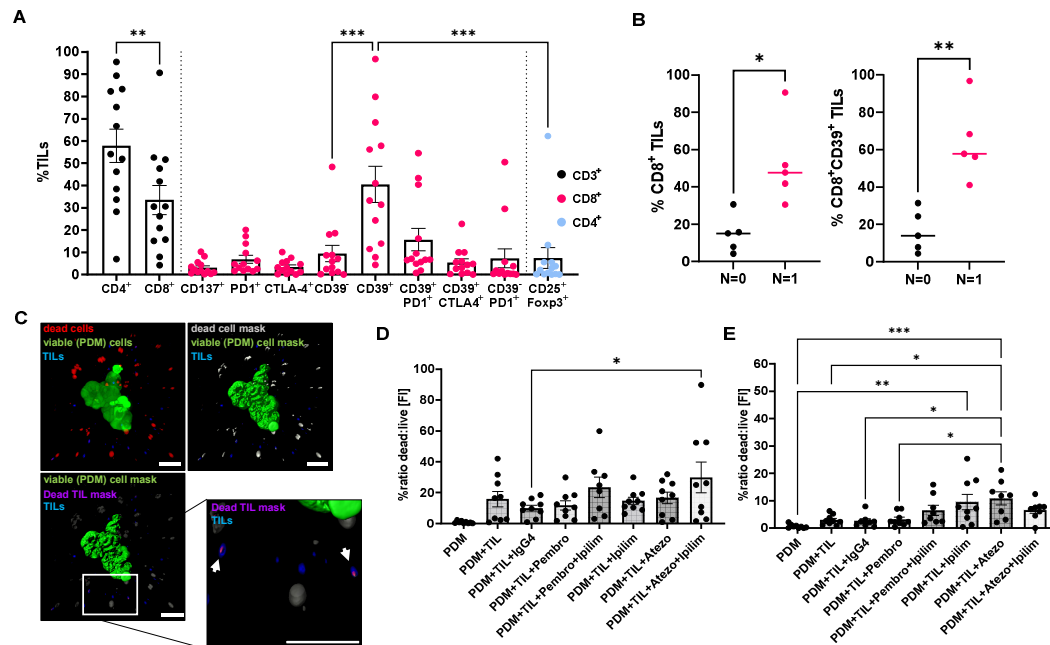

1015  
 1016 **Figure 4. CPI treatment in OvCa PDM-TIL co-cultures increased functional TIL killing**  
 1017 **effects.** Autologous TIL populations were isolated and expanded from OvCa tissue specimen. **(A)**  
 1018 Percentages of different TIL populations within CD3, CD8 and CD4 positive T cells of different  
 1019 models were quantified by multicolor flow cytometry. Data are shown as means  $\pm$  SEM of at least  
 1020  $n = 10$  OvCa samples.  $*P < 0.05$ ,  $**P < 0.01$ ,  $***P < 0.001$ , ANOVA with Holm-Šídák's post hoc  
 1021 test. **(B)** Percentages of CD8<sup>+</sup> and CD8<sup>+</sup>CD39<sup>+</sup> TILs in OvCa patients with lymph node spread ( $N = 1$ )  
 1022 and without lymph node spread ( $N = 0$ ). All points with median are shown.  $*P < 0.05$ ,  $**P <$   
 1023  $0.01$ , Mann-Whitney-U-test. **(C-E)** Killing effects of autologous TILs on corresponding PDM in co-  
 1024 cultures treated with immune checkpoint inhibitors (CPI). **(C)** PDM killing effects were measured  
 1025 in an image-based assay format as ratio of fluorescent intensities (FI) of dead cells vs. live PDM  
 1026 cells. Per treatment  $n = 3$  PDM in three replicates were analyzed. Masks for viable PDM (Calcein-  
 1027 AM staining), dead cells (SYTOX™ Orange dead cell staining) and TILs (CellTracker™ Deep  
 1028 Red staining) were applied using Imaris 8.0 software. Scale bars indicate 50  $\mu$ m. FI from TILs  
 1029 were subtracted from the total dead FI. TILs of OvCa #24 **(D)** and #26 **(E)** were co-cultured with  $n$   
 1030  $= 15$  PDM using an E:T ratio of 4:1 and treated with CPI either alone or in combination.  $*P < 0.05$ ,  
 1031  $**P < 0.01$ ,  $***P < 0.001$ , ANOVA with Holm-Šídák's post hoc test. Pembro: pembrolizumab 60  
 1032  $\mu$ g/ml; Ipilim: ipilimumab 50  $\mu$ g/ml; Atezo: atezolizumab 50  $\mu$ g/ml.  
 1033
