1 **A platform of patient-derived microtumors identifies therapeutic**  
2 **vulnerabilities in ovarian cancer.**

3 Nicole Anderle<sup>1\*</sup>, André Koch<sup>2</sup>, Berthold Gierke<sup>3</sup>, Anna-Lena Keller<sup>1</sup>, Annette Staebler<sup>4</sup>,  
4 Andreas Hartkopf<sup>2</sup>, Sara Y. Brucker<sup>2,5</sup>, Michael Pawlak<sup>3</sup>, Katja Schenke-Layland<sup>1,2,5,6,7</sup>,  
5 Christian Schmees<sup>1\*</sup>

6

7 <sup>1</sup>NMI Natural and Medical Sciences Institute at the University of Tuebingen, Reutlingen, 72770  
8 Germany.

9

10 <sup>2</sup>Department of Women's Health, Eberhard Karls University Tuebingen, Tuebingen, 72076  
11 Germany.

12

13 <sup>3</sup>NMI Technologie Transfer GmbH, Pharmaservices Protein Profiling, Reutlingen, 72770  
14 Germany.

15

16 <sup>4</sup>Institute of Pathology and Neuropathology, Eberhard Karls University Tuebingen, Tuebingen,  
17 72076 Germany.

18

19 <sup>5</sup>Cluster of Excellence iFIT (EXC2180) "Image-Guided and Functionally Instructed Tumor  
20 Therapies", Eberhard Karls University Tuebingen, Tuebingen, 72076 Germany.

21

22 <sup>6</sup>Department of Biomedical Engineering, Eberhard Karls University Tuebingen, 72076 Tuebingen,  
23 Germany.

24

25 <sup>7</sup>Department of Medicine/Cardiology, Cardiovascular Research Laboratories, David Geffen  
26 School of Medicine at UCLA, Los Angeles, CA, 90095 USA.

27

28

29 \* Nicole Anderle, Christian Schmees

30 **Email:** [nicole.anderle@nmi.de](mailto:nicole.anderle@nmi.de), [christian.schmees@nmi.de](mailto:christian.schmees@nmi.de)

31

32

33

34

35

36

37

38

39 **Abstract**

40 **Background:**

41 In light of the frequent development of therapeutic resistance in cancer treatment, there is a  
42 strong need for personalized model systems representing patient tumor heterogeneity, while  
43 enabling parallel drug testing and identification of appropriate treatment responses in individual  
44 patients. Using ovarian cancer as a prime example of a heterogeneous tumor disease with  
45 complex microenvironment and high recurrence rates, we developed a 3D preclinical ovarian  
46 cancer model comprised of patient-derived microtumors (PDM) and autologous tumor-infiltrating  
47 lymphocytes (TILs) for identification of treatment vulnerabilities and validation of anti-cancer drug  
48 efficacy using immunohistochemistry, immune cell phenotyping, functional assays and protein  
49 profiling analyses.

50 **Methods:**

51 PDM and TILs were isolated from fresh primary ovarian cancer tissue specimen using  
52 mechanical disruption and limited enzymatic digestion and were subsequently cultured in  
53 suspension in defined media in the absence of serum. The heterogeneous cellular composition of  
54 isolated PDM as well as autologous TILs was analyzed by FFPE immunohistochemistry and  
55 multi-color flow cytometry, respectively. For in-depth protein profiling of PDM we established  
56 Reverse Phase Protein Array (RPPA) analyses of >110 total and phospho-proteins. Treatment  
57 efficacy in response to chemotherapeutics as well as immunotherapeutic compounds was  
58 assessed in PDM and PDM-TIL co-cultures using a functional viability assay in microplate format.

59 **Results:**

60 The enzymatic digestion of primary ovarian cancer tissue and suspension culture in defined  
61 serum-free media allowed fast and efficient recovery of patient-derived microtumors (PDM).  
62 Immunohistochemical analyses demonstrated histopathological comparability of ovarian cancer  
63 PDM with corresponding patient tumor tissue. Reverse Phase Protein Array (RPPA)-based  
64 analyses of >110 total and phospho-proteins enabled the identification of patient-specific  
65 sensitivities to standard, platinum-based therapy and thereby the prediction of potential

66 treatment-responders. Finally, combining PDM and autologous TILs for individual efficacy testing  
67 of immune checkpoint inhibitor treatment demonstrated the potential for patient-specific  
68 enhancement of cytotoxic TIL activity by this therapeutic approach.

## 69 **Conclusion:**

70 3D patient-derived ovarian cancer microtumors represent a preclinical, ex vivo tumor model that  
71 reflects intertumoral heterogeneity and represent the cellular complexity of individual patient  
72 tumors. Combining protein pathway analysis and anti-cancer drug efficacy testing of PDM  
73 enables drug mode-of-action analyses and therapeutic sensitivity prediction within a clinically  
74 relevant time frame after surgery. Follow-up studies in larger cohorts are currently under way to  
75 further evaluate the applicability of this platform to support clinical decision-making and  
76 personalizing cancer treatment.

77

## 78 **Keywords**

79

80 Preclinical tumor model, ovarian cancer, anti-cancer drug efficacy testing, cancer immunotherapy,  
81 protein profiling, therapy resistance

82

## 83 **Main Text**

84

### 85 **Background**

86 In the context of personalized medicine, patient-derived model systems are expected to play an  
87 important role in order to identify suitable and effective therapies for the individual patient as well  
88 as existing therapeutic resistances of the patient's tumor. Especially for cancer types with dismal  
89 treatment success rates such as ovarian cancer (OvCa), these model systems will be valuable for  
90 future cancer therapy. OvCa is among the most lethal gynecological diseases in women with  
91 >185.000 deaths worldwide in 2018 (1). Late diagnosis and disease complexity characterized by  
92 strong molecular and genetic heterogeneity are causative for its poor survival rates and varying  
93 treatment response to first-line therapy. Substantial efforts have been made to resolve the  
94 complexity of OvCa, especially for high-grade serous carcinomas (HGSC) (2-4). Despite the  
95 application of genomics and transcriptomics in elucidating disease determinants, the principles of

96 responsiveness to therapy are still poorly understood (4). The establishment of patient-derived  
97 tumor organoids (PDO) allowed addressing a number of these challenges for example by in-  
98 depth genetic and phenotypic tumor characterization and analysis of intra-tumoral heterogeneity  
99 in PDOs side-by-side with corresponding tumor tissue (5-8). Even though recent studies have  
100 described the combination of PDO cultures with components of the tumor microenvironment  
101 including fibroblasts, endothelial cells and immune cells (9), PDOs do not fully reflect the original  
102 composition of primary tumor tissue in terms of extracellular matrix, tumor-associated fibroblasts,  
103 tumor-infiltrating lymphocytes (TILs), macrophages (TAMs), and tumor endothelial cells. Another  
104 challenge of current PDO models in terms of applicability for individualized drug response testing  
105 relates to the required establishment time of 1-3 months with a corresponding impact on the  
106 timeframe to obtain drug testing results (10). Using OvCa as a prime model of a heterogeneous  
107 tumor disease, we introduce a three-dimensional (3D) preclinical ex vivo model composed of  
108 patient-derived microtumors (PDM) as well as autologous tumor-infiltrating lymphocytes (TILs)  
109 extracted from primary OvCa tissue specimen in a clinical relevant time-frame. Importantly, PDM  
110 recapitulate a 3D histo-architecture with retained cell-cell contacts and native intra-tumoral  
111 heterogeneity featuring the corresponding primary tumor microenvironment (incl. extracellular  
112 matrix proteins, stromal fibroblasts and immune cells). In combination with functional compound  
113 efficacy testing and multiplexed TILs phenotyping, we demonstrate the correlation of individual  
114 OvCa PDM responses to chemotherapeutic as well as immunotherapeutic treatment approaches  
115 using OvCa PDM alone and in co-culture with autologous TILs, respectively. We apply Reverse  
116 Phase Protein Array (RPPA) analysis to map protein-signaling pathways of PDM and to measure  
117 on- and off-target drug effects in compound treated PDM. Albeit based on a small patient cohort  
118 the available clinical follow-up data suggests a correlation of obtained treatment responses in  
119 OvCa PDM models and corresponding patients indicating prolonged metastasis-free survival of  
120 identified carboplatin-responders as compared to non-responders.

121 Based on the data presented here, we envision that our preclinical assay system combining  
122 PDM, autologous TILs and protein signaling pathway profiling could aid clinical decision-making  
123 in the future and assist in the pre-selection of a personalized clinical treatment strategy for OvCa.

124

## 125 **Materials and Methods**

126

### 127 **Human specimens**

128 Ovarian tumor samples were obtained from nineteen patients diagnosed with ovarian cancer  
129 undergoing surgery at the Center for Women's Health, University Hospital Tuebingen. Written  
130 informed consent was obtained from all participants. The tumors were classified according to  
131 International Federation of Gynecology and Obstetrics (FIGO) grading system. Tumor samples  
132 were delivered on the day of operation. The research project was approved by the ethics  
133 committee (IRB#275/2017BO2 and IRB#788/2018BO2).

### 134 **Isolation and cultivation of patient-derived microtumors and tumor-infiltrating** 135 **lymphocytes**

136 The procedure was adapted from Kondo et al. (2011) (11) and modified as follows. Tumor  
137 specimens were washed in HBSS (Gibco), minced with forceps, and digested with  
138 Liberase<sup>TM</sup> DH (12) for 2h at 37°C. Digested tissue was centrifuged (300g, 5 min), washed  
139 with HBSS and filtered through a stainless 500 µm steel mesh (VWR). The flow-through was  
140 again filtered through a 40 µm cell strainer (Corning). The filtrate containing the TIL fraction was  
141 resuspended in Advanced RPMI 1640 (Gibco) supplemented with 2 mM Glutamine (Gibco), 1%  
142 MEM Vitamins (Gibco), 5% human serum (Sigma-Aldrich) and 100 µg/ml primocin (Invivogen).  
143 IL-2 (100 U/ml), IL-7 (10 U/ml) and IL-15 (23.8 U/ml) (Peprotech) were freshly added to culture  
144 media. For expansion, CD3/CD28 dynabeads were added (Milteny Biotech). PDM, held back by  
145 cell strainer, were washed in HBSS and cultured in suspension in StemPro<sup>®</sup> hESC SFM (Gibco)  
146 supplemented with 8 ng/ml FGF-basic (Gibco), 0.1 mM β-mercaptoethanol (Gibco), 1.8% BSA  
147 (Gibco) and 100 µg/ml primocin (Invivogen) within cell-repellent culture dish (60x15 mm)  
148 (Corning).

149

150 **RPPA and protein data analysis**

151 Detailed methods of sample preparation and RPPA processing are provided in SI Materials.  
152 RPPA protein analysis and protein data processing was applied as reported before (13-15).  
153 Detailed methods of sample preparation and RPPA processing are provided in SI Materials. From  
154 the arrays, PDM sample signals were extracted as protein-normalized, background-corrected  
155 mean fluorescence intensity (NFI), as measured from two technical sample replicates. NFI  
156 signals, median-centered for each protein over all measured samples (including OvCa PDM and  
157 BC PDM samples) and  $\log_2$  transformed, reflect a measure for relative protein abundance. Small  
158 NFI protein signals at around blank assay level (0.02 NFI) were as a limiting quality criterion  
159 excluded from further analysis; otherwise all NFI signals were used for further protein data  
160 analysis. Protein heat maps were generated and cluster analysis (HCL) performed using the  
161 freely available MultiExperiment Viewer (MeV) software. For the comparison of protein profiles of  
162 treatment responders and non-responders (defined by functional compound testing), only  
163 proteins with a >20% difference between the means were used for analysis. On- and off-target  
164 pathway effects were evaluated from one biological and two technical replicate samples per  
165 model at three different treatment times (0.5, 4 and 72 h). Treated sample to respective DMSO  
166 vehicle control NFI ratios (TR) were calculated for each treatment condition and  $\log_2$ -transformed.  
167 A treatment-specific threshold of protein change (carboplatin: minimum 50% difference) was set.  
168 Only proteins showing treatment effects above the threshold were shown.

169 **Efficacy of compounds validated in PDM cultures**

170 Efficacy of compounds was validated by applying the real-time CellTox™ Green Cytotoxicity  
171 assay (Promega). Assays were performed according to manufacturer's protocol. PDM were  
172 cultured a maximum of 1-2 weeks in PDM culture medium prior testing. Per treatment three to  
173 eight replicates were performed using  $n = 15$  PDM per replicate in a total volume of 150  $\mu$ l  
174 phenol-red free PDM culture medium. Cell death was measured as relative fluorescent unit (RFU)  
175 (485–500 nm Ex / 520–530 nm Em), relative to the number of dead, permeable cells after 24h,  
176 48h and 72h with the Envision Multilabel Plate Reader 2102 and Tecan Spark Multimode Plate

177 Reader. RFU values were normalized to DMSO control according to used drug solvent.  
178 Treatment effects were measured as fold change (FC) compared to control. Differences between  
179 treated PDM and untreated PDM were calculated as fold change values separately for each time  
180 point. Statistical significance was evaluated by two-way ANOVA multiple comparison test.  
181 Outliers were identified with the Iglewicz and Hoaglin's robust test for multiple outliers applying a  
182 recommended Z-score of  $\geq 3.5$  (16).

### 183 **FACS analysis**

184 To characterize lymphocyte populations within autologous TIL, cells were harvested (up to  $1 \times 10^6$   
185 cells/staining depending on available number of cells), washed 2x with PBS (200 rpm, 5 min at  
186  $4^\circ\text{C}$ ), resuspended in staining buffer (PBS plus 10% FBS) and plated in a 96-well V-bottom plate  
187 (100  $\mu\text{l}$ /well) (Corning). To verify  $>90\%$  cell viability, cells were counted with a Nucleocounter  
188 (Chemotec) before plating. For each panel staining, an unstained control and if necessary a FMO  
189 control were prepared. For extracellular staining, cells were incubated with antibodies (see SI  
190 Materials) for 30 min at  $4^\circ\text{C}$  in the dark. For subsequent intracellular staining, cells were washed  
191 2-3 times (200 rpm, 5 min at  $4^\circ\text{C}$ ) in eBioscience™ Permeabilization buffer (250  $\mu\text{l}$ /well)  
192 (Invitrogen) and resuspended in eBioscience™ Fixation/Permeabilization solution (Invitrogen) for  
193 20 min at  $4^\circ\text{C}$ . After 2-3 washing steps (200 rpm, 5 min at  $4^\circ\text{C}$ ), cells were incubated with  
194 antibodies (30 min,  $4^\circ\text{C}$  in dark) (see SI Materials). After the staining process, cells were washed  
195 2-3 times and analyzed with a BD FACS Melody machine (BD Biosciences).

### 196 **Co-culture of PDM and autologous TILs**

197 To measure if the expanded, autologous TILs are able to kill corresponding PDM, we performed  
198 endpoint killing assays in a 96-well format with an image-based analysis using Imaris 8.0  
199 software. First, PDM were pretreated with IFN $\gamma$  (200 ng/ml) for 24 h to stimulate antigen  
200 presentation. In parallel, 96-well plates were coated with 5  $\mu\text{g}/\text{ml}$  of anti-CD28 antibody (Biolegend)  
201 o/n at  $4^\circ\text{C}$  to provide a co-stimulatory signal during co-culture. On the next day, coated plates  
202 were washed 3x with PBS. PDM were washed in HBSS, centrifuged and resuspended in co-

203 culture assay media consisting of RPMI 1640 phenol red free (GIBCO) supplemented with 2mM  
204 Glutamin (Gibco), 5% human serum (Sigma-Aldrich), 1x MEM Vitamins (Gibco) and 100 µg/ml  
205 Primocin (Invivogen). Prior of assembling the co-culture, TILs were labeled with CellTracker™  
206 Deep Red Dye (Thermo Fisher Scientific) to differentiate between PDM and TILs. Labeled TILs  
207 were then co-cultured with PDM and in the presence of selected checkpoint immune inhibitors  
208 (CPIs: Pembrolizumab, Atezolizumab, Ipilimumab; Selleck Chemicals GmbH) or control anti-IgG4  
209 antibody with an E:T ratio of 4:1. Thereby we counted 200 cells per single PDM. Per condition,  
210 we prepared triplicates each with 15 PDM and 12 000 TILs per well. After 92 hours, cells were  
211 incubated with a staining solution consisting of live cell stain Calcein-AM (Thermo Fisher  
212 Scientific) and Sytox™ Orange dead cell stain (Thermo Fisher Scientific). After 1 hour, Z-stacks  
213 of n = 3 PDM per well were imaged using a spinning disk microscope (ZEISS CellObserver Z1).  
214 Only viable PDM were positively stained by Calcein-AM, while all dead cells were stained by  
215 Sytox™ Orange. TILs were filtered by CellTracker™ Deep Red signal. Using the Imaris 8.0  
216 software, we applied three masks, one for dead cells, one for dead TILs and one for live PDMs.  
217 For each mask, the total sum of all fluorescent intensities (FI) was calculated and the following  
218 ratio determined:

219 
$$\% \text{ ratio dead vs. viable PDM [FI]} = \frac{\text{total dead [FI]} - \text{dead TIL [FI]}}{\text{viable PDM [FI]}}$$

220

## 221 **Statistical analysis**

222 Statistical analysis was performed using GraphPad Prism. For Boxplot data, whiskers represent  
223 quartiles with minimum and maximum values and the median. Datasets with no clear normal  
224 distribution were analyzed with unpaired, two-tailed Mann-Whitney-U-test, otherwise as indicated.  
225 Correlation data were evaluated by Spearmans rank correlation. For all analyses, *P* values < 0.05  
226 were considered statistically significant. Recommended post-hoc tests were applied for multiple  
227 comparisons.

228



229 **Results**

230 **Isolation of patient-derived microtumors with high viability from primary OvCa tissue**  
 231 **specimen by limited enzymatic digestion**

232 Residual fresh tumor tissue samples were collected from n = 19 OvCa patients undergoing  
 233 primary tumor debulking surgery. Available, anonymized clinico-pathological characteristics  
 234 including International Federation of Gynecology and Obstetrics (FIGO) staging and pathological  
 235 TNM-classification of respective individuals are summarized in Table 1.

**Table 1.** Clinical patient data from OvCa tumor specimen included into the study.

| Sample OvCa # | Age at surgery | Histopathological classification | Cellular origin       | Grade | FIGO stage                      | T                               | N               | M    | L  | V  | Pn  | R   | Isolated PDM |
|---------------|----------------|----------------------------------|-----------------------|-------|---------------------------------|---------------------------------|-----------------|------|----|----|-----|-----|--------------|
| #1            | 53             | HGSC                             | epithelial            | HG    | III                             | pT3c<br>(liver/splenic capsule) | pN1a<br>(2/14)  | Mx   | L1 | V1 | Pn1 | Rx  | yes          |
| #3            | 88             | HGSC                             | epithelial            | HG    | IIB                             | pT2b<br>(peritoneum douglas)    | Nx              | Mx   | L0 | V0 | Pn0 | Rx  | yes          |
| #4            | 54             | HGSC                             | epithelial            | HG/G3 | IIIC                            | ypT3c                           | ypN0            | Mx   | L0 | V0 | Pn0 | Rx  | yes          |
| #5            | 59             | HGSC                             | epithelial            | HG/G3 | IIIC                            | pT3c                            | pN1a<br>(2/18)  | Mx   | L0 | V0 | Pn0 | Rx  | no           |
| #7            | 67             | HGSC                             | epithelial/peritoneal | HG    | IVa                             | Tx                              | Nx              | Mx   | Lx | Vx | Pnx | Rx  | yes          |
| #8            | 44             | MC                               | epithelial            | LG    | Ia                              | T1a                             | Nx              | Mx   | Lx | Vx | Pnx | Rx  | yes          |
| #11           | 84             | HGSC                             | epithelial            | HG/G3 | IIIC                            | pT3c<br>(peritoneal metastasis) | pN1a<br>(2/6)   | Mx   | Lx | Vx | Pnx | R1  | no           |
| #12           | 81             | FT                               | sex-chord/stromal     | -     | No indication<br>for malignancy | Tx                              |                 |      |    |    |     |     | no           |
| #13           | 71             | LGSC                             | epithelial            | LG/G2 | IIIC                            | pT3c                            | pN0             | Mx   | L0 | V0 | Pn0 | Rx  | yes          |
| #16           | 60             | HGSC                             | epithelial            | HG/G3 | IVb                             | ypT3b                           | ypN0            | cM0  | L1 | V0 | Pn0 | R0  | no           |
| #17           | 62             | HGSC                             | epithelial            | HG    | IIIC                            | pT3c                            | pN0             | Mx   | L1 | V0 | Pn0 | Rx  | yes          |
| #18           | 61             | HGSC                             | epithelial            | HG/G3 | IIIC                            | ypT3c                           | ypN0            | cM0  | L0 | V0 | Pnx | R0  | yes          |
| #19           | 60             | HGSC                             | epithelial            | HG/G3 | IIIB                            | pT3b                            | pN0             | cM0  | L0 | V0 | Pn0 | R0  | yes          |
| #20           | 66             | HGSC                             | epithelial            | HG    | IVa                             | pT3c<br>(pleural effusion)      | pN1a            | pM1a | L0 | V0 | Pn0 | Rx  | no           |
| #21           | 74             | adult-type GCT                   | sex-chord/stromal     | -     | IA                              | pT1a                            | pNx             | cM0  | L0 | V0 | Pn0 | R0  | yes          |
| #23           | 71             | HGSC                             | epithelial            | HG/G3 | IIIC                            | pT3c<br>(Omentum metastasis)    | pN1a            | pMx  | L1 | V0 | Pn0 | Rx  | yes          |
| #24           | 73             | HGSC                             | epithelial            | HG    | IIIC                            | pT3c                            | pN1b<br>(58/75) | Mx   | L1 | V0 | Pnx | R0  | yes          |
| #25           | 54             | HGSC                             | epithelial            | HG    | IIA                             | pT2a (tube)                     | pN0             | cM0  | L0 | V0 | Pn0 | cR0 | yes          |
| #26           | 67             | HGSC                             | epithelial            | HG/G3 | IIIC                            | pT3c                            | pNx             | Mx   | L1 | V0 | Pn0 | cR0 | yes          |

236 FT, fibrothecoma; GCT, granulosa cell tumor; HGSC, high grade serous carcinoma; LGSC, low grade  
 237 serous carcinoma; MC: mucinous carcinoma T: extent (size) of the tumor; N: spread to nearby lymph nodes;  
 238 M: spread to distant sites; L, lymphatic invasion; V, venous invasion; Pn, perineural invasion; R, residual  
 239 tumor; p, pathological state; c, clinical stage; y, restaged after neoadjuvant therapy; x, not assessed;  
 240

241 2/19 patients (OvCa #4 and OvCa #18) received neoadjuvant treatment with  
 242 carboplatin/paclitaxel chemotherapy. The majority of included samples (n = 17) were derived from  
 243 the most common type of OvCa, i.e. epithelial OvCa, with a majority of high-grade serous  
 244 carcinomas (HGSC). Two samples were classified as sex-chord-stromal ovarian carcinomas that  
 245 are either non-malignant or at a low stage. The PDM and TIL isolation procedure (further

246 developed from Kondo *et al.* 2011) (11) was performed on freshly excised tumor tissue specimen  
247 (Scheme 1).

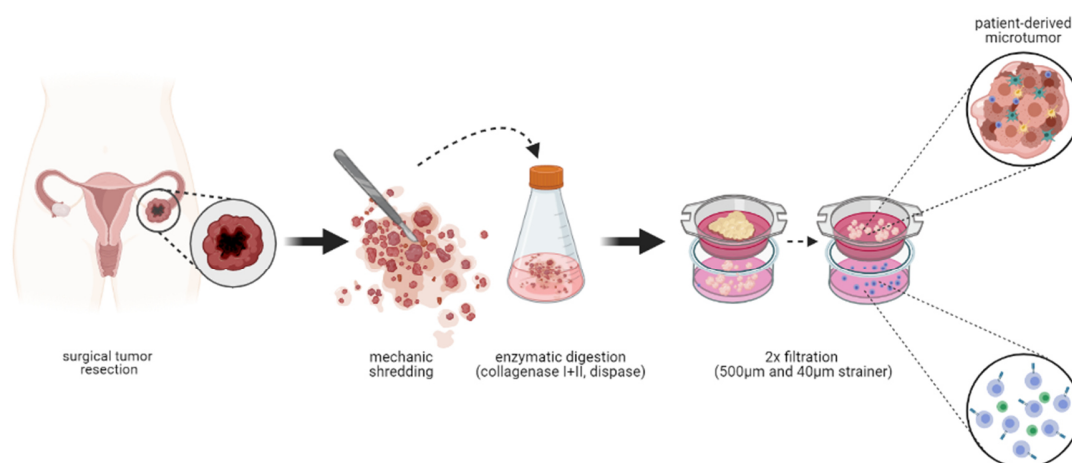

**Scheme 1. PDM isolation from OvCa tumor samples within 3 hours after receipt of the tumor sample.** Tumor tissue derived from surgical tumor resection is kept in culture media for transportation. Immediately after receipt of the sample, the tissue is mechanically disrupted into smaller pieces and enzymatically digested for 2 hours. Afterwards the digested tissue gets filtered twice using cell strainers. Within the first filtrate tumor-infiltrating lymphocytes are obtained ready for culturing or cryopreservation. From the residue of the second strainer, PDMs are gained ready for culturing or cryopreservation. (Created with Biorender.com)

248

249 Isolation of PDM a was successful in >70% (14/19) of the tumor samples (Fig. 1A) with varying  
250 amounts of available PDM for downstream analyses such as live-dead staining,  
251 immunohistochemical characterization, protein signaling pathway analyses and efficacy drug  
252 testing of standard-of-care therapy as well as immunotherapy (Scheme 2). PDMs were cultured in  
253 suspension in the absence of serum for a maximum of three weeks. No correlation was observed  
254 between successful isolation of PDM and available clinical patient data such as age, lymph node  
255 spread, distant cancer spread, perineural invasion or FIGO stage (Table S1). PDM viability was  
256 assessed by parallel staining with Calcein-AM and SYTOX™ Orange (Fig. 1B). 2D projections of  
257 3D images displayed highly viable PDM with few dead cells. Dead PDM cells (according to  
258 nuclear SYTOX™ Orange staining) detached from PDM and thus observed mostly as single cells  
259 floating in the culture media. The quantification of the viable cell volume and dead cell volume in

260 3D projections of four exemplary OvCa PDM models are shown in Fig. 1C. In each analyzed  
261 model,  $\leq 7\%$  of the total PDM cell mass represented dead cells confirming robust PDM viability.

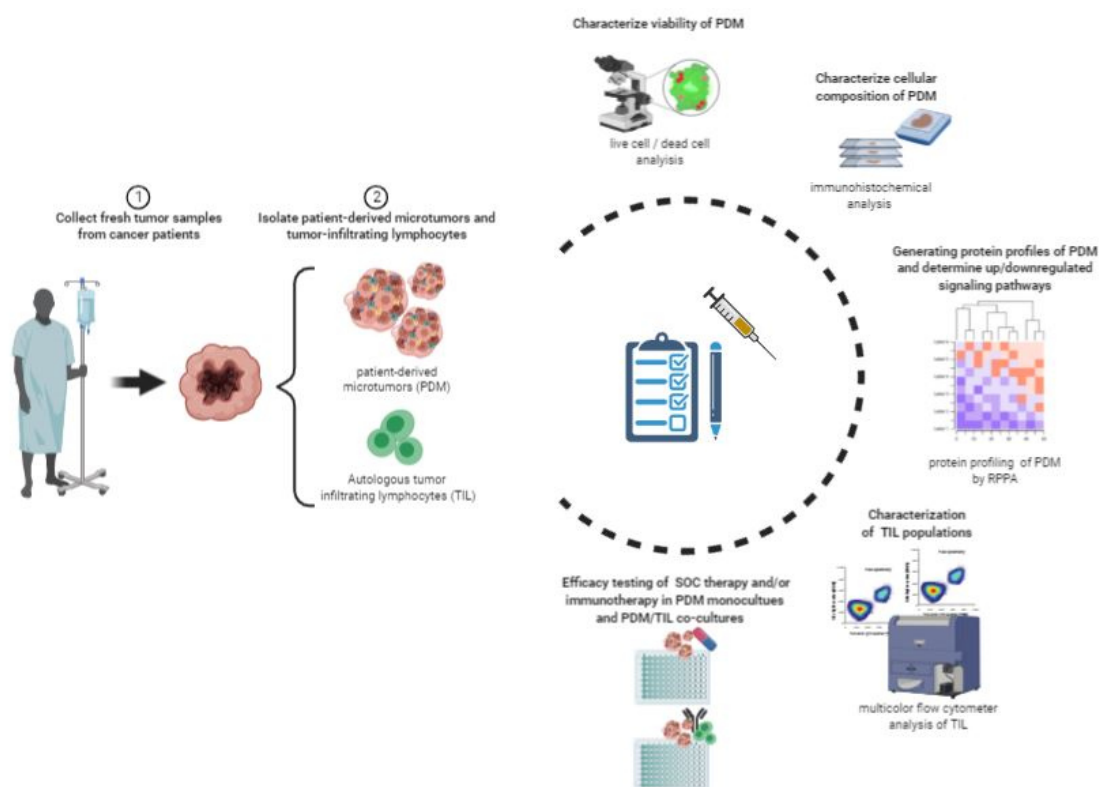

262

**Scheme 2. Illustration of established downstream analyses of PDM and TILs.** After the receipt of the tumor sample, PDM and TILs are immediately isolated and cultured. The viability of PDM is checked by a live/dead cell staining. Afterwards, the total number of available PDM is assessed. PDM are paraffin-embedded for immunohistochemical analyses. Anti-cancer drug efficacy is evaluated by measuring cytotoxicity in real-time requiring at least 300 PDM in total using 15 PDM per replicate (in total 4x). A minimum of 100-150 PDM are needed for further protein profiling analyses by RPPA. TILs are cultured and expanded for flow cytometry analyses as well as possible co-culture assays with PDM to assess immunotherapy sensitivity. Dependent on the total amount of PDM available, different downstream analyses are conducted and used for therapeutic sensitivity prediction. (Created with Biorender.com)

263 **OvCa PDM sections resemble histopathological characteristics of the corresponding**  
264 **primary tumor tissue (PTT)**

265 We next performed Hematoxylin and Eosin staining (H&E) of FFPE- and cryo-sections,  
266 respectively, derived from OvCa PDM and corresponding primary tumor tissue sections (PTT) for  
267 histopathological comparison. Professional assessment of PDM by a certified pathologist,  
268 confirmed typical, distinct histopathological characteristics of OvCa in respective PDM (Fig. 2 and  
269 Fig. S1). HGSC derived PDM reflected architectural patterns such as papillary growth, irregular  
270 branching, cystic and glandular structures (Fig. 2 OvCa #17-23; Fig. S1, OvCa #24, 26) as

271 compared to the corresponding PTT specimen. Pleomorphic nuclei/cells, high nucleus:cytoplasm  
272 ratio as well as hyperchromasia were similar in PDM and corresponding PTT sections reflecting  
273 the high-grade of analyzed HGSC tumors. These tumor features were not detected within OvCa  
274 PDM #8 (Fig. S1), which originated from low-grade mucosal OvCa known for slow tumor growth.  
275 Instead, OvCa #8 PDM displayed a unicellular epithelium and mostly stromal remains. In  
276 summary, histopathological analyses of PDM confirmed structural and cellular similarities to the  
277 corresponding primary tumor specimen resembling typical histological features of ovarian  
278 carcinomas.

279

#### 280 **PDMs reflect intra- and intertumoral heterogeneity of the original tumor**

281 For further characterization and study of the similarity of OvCa PDM and corresponding PTT, the  
282 expression of histotype specific markers, different tumor cell-, extracellular matrix- and immune  
283 cell-markers were assessed by immunohistochemistry (Fig. 2, Fig. S1). In the clinics,  
284 immunohistochemical staining of p53 and Wilms Tumor 1 (WT1) is applied for differential  
285 diagnosis of HGSCs (17). HGSC phenotype of the original tumor persists in the corresponding  
286 PDM as marker expression of WT1/p53 corresponded well with either low-to-moderate (OvCa  
287 #17-18) or strong expression (OvCa #23). Mesothelin (MSLN) and CA125 (MUC16) were used as  
288 additional OvCa markers. Mesothelin, known to be over-expressed on the cell surface in OvCa  
289 (18-20), was expressed in OvCa PDM mostly resembling expression of this marker in the  
290 corresponding PTT. Besides MSLN, CA125 expression has previously been described as an  
291 immunohistochemical marker to confirm ovarian origin of the tumor (21). As shown before (22,  
292 23), expression of CA125 in OvCa sections can vary within one type and between the different  
293 OvCa tumor types. Accordingly, PTT sections derived from non-HGSC displayed no CA125  
294 expression (OvCa #8) in contrast to HGSC-derived tumor sections (OvCa #17-18, #23-26). In  
295 PDM models OvCa#8, #17, #18 and #24 staining patterns of MSLN and CA125 were similar to  
296 corresponding PTT sections and were often restricted to cells at the tumor margin for CA125 (e.g.  
297 OvCa #18, #23). As the tumor microenvironment is known to play a major role in tumor  
298 progression and metastasis (24-26), we analyzed the presence of extracellular matrix (ECM) and

299 stromal components in OvCa PDM and corresponding PTT. Sections were stained for FAP $\alpha$   
300 (Fibroblast associated protein alpha), a marker of activated fibroblasts, also known as cancer-  
301 associated fibroblasts (CAFs). FAP $\alpha$  expression in tumor stroma is observed in 90% of human  
302 cancers of epithelial origin and has been described to induce tumor progression and  
303 chemoresistance (27). FAP $\alpha$  staining in OvCa PDM mostly resembled that of the corresponding  
304 PTT in all samples except for OvCa #24-26 and differed from low to high expression. Collagen I  
305 expression, known to promote invasiveness and tumor progression in epithelial OvCa (28), was  
306 also prominent within OvCa PDM. Stainings correlated with corresponding PTT that showed an  
307 overall strong Collagen I expression except for OvCa #25. We also observed a strong correlation  
308 of Hyaluronan Binding Protein 1 (C1QBP) expression in PDM and corresponding PTT, which  
309 interacts with the major ECM component hyaluronan (29). In summary, all studied stromal  
310 components were found to be highly abundant within OvCA PDM and corresponding PTT. To  
311 further examine tumor microenvironmental (TME) components of PDM, we studied the infiltration  
312 with tumor-associated macrophages (TAMs) via CD163 expression together with the expression  
313 of the inhibitory checkpoint receptor ligand PD-L1. Analysis rarely detected M2-like TAMs  
314 (CD163<sup>+</sup>) within PTT and PDM sections and if so, mostly in stromal tissue parts. While  
315 macrophages were highly frequent in OvCa #24 PTT, they were not detected in the  
316 corresponding PDM (Fig. S1). In contrast, for OvCa #17, CD163<sup>+</sup> TAMs were detected in both  
317 PDM and PTT sections (Fig. 2). Immune checkpoint receptor ligands are known to be expressed  
318 on tumor and/or immune cells of the tumor microenvironment. Here, PD-L1 expression was  
319 mostly absent in OvCa PTT and corresponding PDM sections. In conclusion, PDM largely  
320 resembled features of the original tumor by direct comparison with corresponding PTT including  
321 presence of complex ECM and TME architecture and expression of markers specific for OvCa. In  
322 comparison with corresponding PTT sections, pure stromal areas were mostly absent from  
323 stained PDM sections, which might explain differences observed between PDM and  
324 corresponding PTT with regard to immune cell infiltration and degree of expression of stromal  
325 components.

326 **Protein signaling pathway profiling of OvCa PDM by RPPA**

327  
328 After initial immunohistochemical characterization of the 3D OvCa PDM that confirmed the  
329 presence of TME components in PDM similar to corresponding PTT, we performed an in-depth  
330 examination of the heterogeneity and molecular composition of different OvCa PDM models by  
331 generating signaling pathway protein profiles using RPPA. Protein abundances of 116 different  
332 proteins (including total and post-translationally modified forms) were measured in OvCa PDM  
333 samples each with a sample size of  $n = 100-150$  per individual PDM (Fig. 3A). One further PDM  
334 sample derived from human BC (breast cancer) was included to scale up the protein sample data  
335 and for comparison as both cancer types are known to share molecular and microenvironmental  
336 similarities (26, 30). Obtained protein-normalized, background-corrected mean fluorescence  
337 intensity (NFI) signals were median-centered to all samples ( $n = 8$ ) and  $\log_2$  transformed. Protein  
338 profiles of PDM samples covered signaling pathways such as for cell cycle, DNA damage  
339 response, apoptosis, chromatin regulation, MAPK/RTK, PI3K/AKT with mTOR, Wnt and NF $\kappa$ B, as  
340 well as OvCa tumor/stem cell markers. By hierarchical clustering (HCL), PDM samples were  
341 grouped according to their similarities in relative protein signal intensity (Fig. 3A). Data analysis  
342 revealed three clusters: 1) OvCa #21 (OvCa granulosa cell tumor) and #23 (HGSC), with the  
343 most distinct protein profiles as compared to the other PDM analyzed; 2) OvCa #19 (HGSC) and  
344 the BC PDM shared more similarities than OvCa #19 with the other OvCa PDM models; 3). The  
345 remaining PDM samples resembled the third cluster with the most similar protein expression  
346 profiles containing exclusively HGSC models. Long distances of the sample dendrogram further  
347 underlines the proteomic heterogeneity of similar histopathological OvCa tumor types.  
348 To compare protein abundances within different signaling pathways as well as of tumor/stem cell  
349 markers, proteins with impact on pathway activity were sorted according to their pathway  
350 affiliation (Fig. 3B, Table S2). Significant differences between PDM models were observed for the  
351 cell cycle pathway and the MAPK/RTK pathway. Highest cell cycle activity was found in OvCa  
352 #17 and #24 with almost 50% higher median NFI signals compared to OvCa #21 with the lowest  
353 median signals (median NFI =  $-0.33 \log_2$ ) resembling a different histopathological tumor type

354 compared to the other PDM models analyzed. MAPK/RTK pathway signaling was increased in  
355 OvCa #21 (median NFI = 0.38 log<sub>2</sub>), #23 (median NFI= 0.32 log<sub>2</sub>), #24 (median NFI = 0.31 log<sub>2</sub>)  
356 and #17 (median NFI = 0.30 log<sub>2</sub>). The BC PDM model was characterized by decreased median  
357 NFI signals of MAPK/RTK proteins (median NFI = -0.47 log<sub>2</sub>). Proteins related to PI3K/AKT  
358 pathway and of associated pathways were more abundant in OvCa #17 and #24. mTOR pathway  
359 levels were elevated in OvCa #24 (median NFI = 0.54 log<sub>2</sub>) in other OvCa PDM this pathway  
360 showed comparable activity. Median NFI signals from apoptosis-related proteins were  
361 significantly different between OvCa #25 (median NFI = 0.75 log<sub>2</sub>) and BC PDM (median NFI=  
362 1.41 log<sub>2</sub>). OvCa tumor/stem cell marker protein abundance was significantly upregulated in both  
363 OvCa #17 and #23 compared to BC PDM. Thus, RPPA protein profiling analysis demonstrated  
364 the heterogeneous activity of several signaling pathways within different OvCa PDM. Apoptosis-  
365 related proteins and OvCa tumor/stem cell marker proteins indicated the strongest differences  
366 between OvCa PDM models and the BC PDM model.

367

### 368 **Heterogeneous treatment responses towards chemotherapy assessed by functional** 369 **compound testing in OvCa PDM**

370

371 Next, we used OvCa PDM as a platform for functional compound efficacy testing using standard-  
372 of-care chemotherapy treatment. Further, we sought to relate treatment responses in PDM to the  
373 generated protein profiling datasets. PDM were treated with carboplatin at up to three different  
374 concentrations (75, 100 and 125µM), chosen according to the previously reported C<sub>max</sub>  
375 concentration of 135µM (31). Treatment efficacy in OvCa PDM – as measured by cytotoxicity -  
376 was heterogeneous among individual PDM models. Carboplatin induced the most significant  
377 cytotoxic effects at the lowest dose (75 µM) and longest treatment duration t = 72 h in OvCa #17  
378 and #24 (Fig. 3C). On the molecular level, RPPA protein profiling revealed significantly increased  
379 cell cycle activity in both models (Fig. 3B), which might be associated with the comparably strong  
380 carboplatin response observed in OvCa PDM #17 and #24. OvCa #23 displayed reduced  
381 carboplatin sensitivity, with significant response observed after treatment at the highest dose of  
382 125µM. Accordingly, OvCa #23 showed intermediate cell cycle activity in protein profiling

383 analyses (Fig. 3B). In conclusion, functional compound testing further confirmed the molecular  
384 heterogeneity of studied OvCa PDM models identified by protein profiling, which manifests in  
385 individual treatment responses to carboplatin.

386  
387 **Correlation of carboplatin treatment response and activation state of protein signaling**  
388 **pathways**

389  
390 To relate the analyzed protein signaling pathways of untreated OvCa PDM to observed treatment  
391 responses, protein NFI signals of PDM were grouped into responder and non-responder profiles  
392 according to significant treatment effects from functional compound testing (Fig. 3C). Mean  
393 protein signals (NFI) with >20% difference between responder and non-responder were plotted  
394 as heat map and significant differences of pathway signaling were analyzed. Further, we  
395 examined the on- and off-target pathway effects within different OvCa PDM models by RPPA to  
396 assess drug mode-of-action. For this aim, OvCa PDM were treated at one compound  
397 concentration and compared to vehicle (DMSO) control. Treatment-to-control signal ratios (TR)  
398 were determined from protein NFI signals of treated PDM samples and DMSO vehicle controls at  
399 three different time points for each treatment: immediate (30 min), early (4 h) and late (72 h). This  
400 enabled the exploration of fast and late treatment response based on changes of protein  
401 abundances within a given time frame.

402  
403 **Carboplatin treatment sensitivity of OvCa PDM correlates with high protein**  
404 **abundance of G2-M cell cycle proteins**

405  
406 HCL clustering of PDM protein NFI signals led to five clusters that distinguish carboplatin  
407 sensitive and resistant PDM models (Fig. 4A). To analyze significant differences related to  
408 activation or inactivation of signal transduction pathways, proteins from the HCL clustering were  
409 sorted according to their pathway affiliation and according to upregulation or downregulation in  
410 responder PDM models. Carboplatin-responder PDM models showed significantly increased cell  
411 cycle activity ( $P < 0.001$ ; Fig. 4B) with upregulated protein abundance observed for Aurora A  
412 kinase (mean NFI = 0.74 log<sub>2</sub>), CDK2 (mean NFI = 0.8 log<sub>2</sub>), Cyclin B1 (mean NFI = 0.84 log<sub>2</sub>),  
413 PCNA (mean NFI = 0.84 log<sub>2</sub>), and acetylated Tubulin (mean NFI = 0.1 log<sub>2</sub>) (Fig. S2A), which



414 are mostly related to “mitosis” (32, 33). Aurora A (Spearman’s  $r = 0.912$ ,  $P = 0.022$ ), Cyclin B1  
415 (Spearman’s  $r = 0.971$ ,  $P = 0.011$ ) and PCNA (Spearman’s  $r = 0.912$ ,  $P = 0.022$ ) significantly  
416 correlated with carboplatin treatment sensitivity (Table S3), which was graded according to  
417 recorded significance levels from “0-3” (“0”:  $P > 0.05$ ; “1”:  $P < 0.05$ ; “2”:  $P < 0.01$ ; “3”:  $P < 0.001$ ;  
418 Fig. 3C). At the same time, Carboplatin non-responder PDM models showed higher abundance of  
419 CDK1 (mean NFI =  $0.38 \log_2$ ), phospho-CDK2 (mean NFI =  $0.77 \log_2$ ) and phospho-CDK4 (mean  
420 NFI =  $0.37 \log_2$ ) (Fig. S2B), which are more related to the G0/G1 cell cycle phase. In addition, the  
421 apoptosis/DNA damage response pathway was significantly upregulated in Carboplatin-  
422 responder compared to non-responder PDM models ( $P = 0.021$ ; Fig. 4B), especially with high  
423 abundance of cleaved Caspase-8 and cleaved PARP (Fig. S2A). Additional significant differences  
424 between Carboplatin responder and non-responder OvCa PDM were detected within the RTK  
425 and the PI3K/AKT/NF $\kappa$ B signaling pathways ( $P < 0.001$ ; Fig. 4B). These pathways were  
426 downregulated in the Carboplatin non-responder group. Higher EMT/tumor/CSC marker  
427 abundance was significantly associated with the Carboplatin responder group (Fig. 4B) including  
428 protein markers Mesothelin, Nanog, STAT1, and E-Cadherin (Fig. S2A). In contrast, there were  
429 few proteins found, which were down-regulated in the carboplatin responder group. Collectively,  
430 this panel of down-regulated proteins differed significantly compared to the Carboplatin non-  
431 responder group (Fig. 4B). It contained early cell cycle markers e.g. Aurora A and Cyclin B1, the  
432 mTOR pathway effector phospho-S6RP, PDGFR and SNAI1. We further assessed metastasis-  
433 free-survival (MFS) between the described carboplatin responder (OvCa #17, #23-25) and non-  
434 responder (OvCa #19, #26) PDM models (Table S4). Metastasis-free-survival (MFS) analyses of  
435 available clinical follow-up patient data revealed prolonged median MFS of 16.2 month in  
436 Carboplatin responder vs. versus 9.2 months in Carboplatin non-responder models.  
437 In summary, the activation state of different signaling pathways comprised of proteins with >20%  
438 difference in abundance, allowed to significantly distinguish carboplatin responder from non-  
439 responder OvCa PDM models. Importantly, these protein signaling response profiles were well in

440 line with results from functional compound efficacy testing assays using those OvCa PDM  
441 models.

442 **Carboplatin treatment is associated with early induction of stress-response and**  
443 **late apoptosis**

444 Next, we sought to investigate the carboplatin drug mode-of-action within OvCa PDM. Therefore,  
445 the carboplatin-responding OvCa PDM #24 was treated with carboplatin at a concentration of  
446 75  $\mu$ M, which had significantly induced PDM cytotoxicity in this model (see Fig. 3C). Protein NFI  
447 signals were measured at three different time points and normalized to vehicle control. Proteins  
448 revealing >50% difference in TR signals (Fig. S3) were selected to focus on the strongest  
449 changes in abundance. Cell cycle progression proteins (phospho-CDK2, CDK1) and phospho-  
450 Histone H3 (Ser10), affecting chromatin condensation during cell division, were downregulated  
451 quickly within 30 minutes (Fig. 4C). After 4 h of treatment, TR signals of phospho-Aurora A/B/C  
452 protein and Histone H3 was strongly increased (Fig. S3). Longer incubation with carboplatin (72  
453 h) resulted in strong downregulation of these proteins (Fig. 4C). Diminished abundance of cell  
454 cycle proteins after 72 h of carboplatin treatment differed significantly from vehicle control ( $P <$   
455  $0.001$ ) and from early treatment (4 h;  $P < 0.001$ ). While levels of cell cycle related proteins  
456 decreased over time, apoptotic markers such as cleaved-Caspases as well as acetylated p53  
457 were elevated after 72 h (Fig. S3). Induction of apoptosis-related proteins was already observed  
458 after 4 h of treatment (Fig. 4C) with increasing abundances of cleaved Caspase 7 and acetylated  
459 p53 (Fig. S3). Focusing on down-stream PI3K/AKT/mTOR/Wnt pathway regulation, the  
460 abundances of mTOR effector proteins (S6RP, S6RP-phospho) were quickly upregulated after  
461 immediate (0.5 h) carboplatin treatment (Fig. S3), which is in line with previous reports about  
462 transcriptional regulation of stress response by the mTOR pathway (34). We also observed  
463 additional elevation of mTOR pathway-related proteins after 4 h of carboplatin treatment.  
464 Furthermore, overactive mTOR signaling might have resulted in increased p53 activation through  
465 upregulated acetylated p53 levels (Fig. S3) as described before (34). The PI3K/AKT/mTOR  
466 pathway was significantly upregulated within 4 h of carboplatin treatment compared to vehicle  
467 control ( $P = 0.021$ ; Fig. 4C). Similar to proteins related to cell cycle, this pathway was completely  
468

469 abrogated as compared to vehicle control after 72 h of treatment ( $P < 0.001$ ; Fig. 4C). Changes in  
470 protein abundance differed significantly during all three measured time points (0.5 h vs. 4 h:  $P =$   
471 0.003; 4 h vs. 72 h and 0.5 h vs.72 h:  $P < 0.001$  Fig. 4C). Pronounced, significant downregulation  
472 of MAPK/RTK pathway occurred after 72 h of treatment ( $P = 0.017$ ; Fig. 4C). The observed  
473 proteomic changes within MAPK/RTK-related proteins over time were significant (0.5 h vs. 4 h:  $P$   
474 = 0.009; 4 h vs. 72 h:  $P < 0.001$ ; Fig. 4C). Thus, carboplatin treatment of OvCa #24 illustrated  
475 substantial and time-dependent changes in TR signals. Short treatment with carboplatin  
476 apparently triggered the induction of stress responses while longer treatment duration caused the  
477 induction of apoptosis.

478  
479 **Characterization of tumor-infiltrating lymphocyte populations from primary OvCa tissue**  
480 **samples**

481  
482 Our established procedure of tissue processing and PDM isolation enabled us to obtain single-  
483 cell suspensions containing tumor-infiltrating lymphocytes (TILs) from respective OvCa tumor  
484 specimen. This allowed for expansion of these autologous TILs in the presence of low-dosed  
485 cytokines and antigenic stimulation in order to investigate immuno-phenotypes of respective  
486 patient samples. The immunogenicity of OvCa has been demonstrated in prior studies and is  
487 confirmed by the frequent infiltration of ovarian tumors with TILs (35-37). As reported by Sato *et*  
488 *al.* (2005), different T cell populations diversely influence tumor immunosurveillance in OvCa.  
489 High intraepithelial CD8<sup>+</sup>/CD4<sup>+</sup> T cell ratios in patients were associated with improved survival as  
490 CD4<sup>+</sup> T cells executed immunosuppressive functions. To determine the composition of the  
491 isolated immune cell infiltrate within our sample cohort, we characterized the phenotype of  
492 autologous TIL populations by multi-color flow cytometry (Fig. S4A). Within isolated and  
493 expanded OvCa TIL populations from different specimen, we found that the proportion of CD4<sup>+</sup>  
494 TILs was 57.8% and significantly more abundant than CD8<sup>+</sup> TILs with 33.5% ( $P = 0.003^{**}$ ; Fig.  
495 5A, Table S5).

496  
497  
498

499 **Isolated CD8<sup>+</sup> OvCa TILs are comprised of tumor-specific CD39<sup>+</sup>, stem-like CD39<sup>+</sup>PD1<sup>+</sup> and**  
500 **terminally differentiated CD39<sup>+</sup>PD1<sup>+</sup> populations**

501  
502 Within the isolated CD8<sup>+</sup> TIL populations, we identified different phenotypes according to  
503 expression of the co-inhibitory receptors PD-1 and CTLA-4, the tumor-antigen specificity marker  
504 CD39 and the activation marker CD137 (Fig. 5A). To investigate the activation status of CD8<sup>+</sup>  
505 TILs, cells were examined for co-expression of the co-stimulatory receptor CD137 (4-1BB).  
506 CD137 is upregulated in activated T cells and has been suggested to be a marker for antigen-  
507 activated T cells (38). The mean percentage of CD8<sup>+</sup> CD137<sup>+</sup> TILs was 3.1% and varied between  
508 0-10% (Table S5). >5% of the CD8<sup>+</sup> cytotoxic T-cells (CTLs) from OvCa #1, #3 and #5 (Fig. 5B)  
509 co-expressed CD137 indicating their pre-exposure to tumor antigens. Expression of co-inhibitory  
510 receptors PD-1 and CTLA-4 on CD8<sup>+</sup> TILs did not differ significantly among analyzed TIL  
511 populations but tended to higher PD-1 expression levels (mean 6.9% vs. 3.4%; Table S5). TILs  
512 from OvCa #3, #7 and #25 as well as #5, #13 and #26 were among those displaying an  
513 exhausted phenotype with >10% of CD8<sup>+</sup>PD-1<sup>+</sup> or CD8<sup>+</sup>CTLA-4<sup>+</sup> TILs (Fig. 5B). Moreover, in  
514 recent reports CD39 expression in CD8<sup>+</sup> TILs was described as a marker for tumor-antigen  
515 specific TILs that have undergone tumor-antigen-driven clonal expansion, exhibit resident  
516 memory T cell like phenotypes and express a variety of co-stimulatory and co-inhibitory receptors  
517 (39-41). Here, CD39<sup>+</sup> CTLs (mean 40.5%; range 4.4-96.8%, Table S5) were significantly  
518 more abundant than CD39<sup>-</sup> CTLs (mean 9.5%; range 0-48.3%, Table S5) so called 'bystander  
519 TILs' known to recognizing mostly viral antigens (40) ( $P < 0.001$ , Fig. 5A). The amount of CD39<sup>+</sup>  
520 TILs strongly correlated with the amount of CD8<sup>+</sup> TILs (Spearman  $r = 0.88$ , Fig. S4B;  $P < 0.001$ ,  
521 Table S6) and conversely with the amount of CD4<sup>+</sup> TILs (Spearman  $r = -0.80$ , Fig. S4B;  $P =$   
522  $0.002$ , Table S6). Thus, the abundance of CD4<sup>+</sup> and CD8<sup>+</sup> TILs appeared to significantly  
523 determine the amount of CD39<sup>+</sup> CTLs. In addition, CD39 expression was largely limited to CD8<sup>+</sup>  
524 TILs. As co-inhibitory receptors play a role in T cell exhaustion and are important targets for  
525 immune checkpoint-inhibition, we analyzed PD-1 and CTLA-4 expression on the tumor-specific  
526 CD39<sup>+</sup> CTL population. PD1<sup>+</sup>CD39<sup>+</sup> were more frequent than CTLA-4<sup>+</sup> CD39<sup>+</sup> (15.7% vs. 5.4%  
527 Fig. 5A, Table S5). The total amount of CD8<sup>+</sup>PD1<sup>+</sup> TILs thereby correlated with the amount of

528 CD8<sup>+</sup>CD39<sup>+</sup>PD1<sup>+</sup> TILs (Spearman  $r = 0.79$ , Fig. S4B;  $P = 0.002$ , Table S6) of a PDM model.  
529 Thus, CD39 expression was limited to tumor-antigen stimulated and exhausted TILs (e.g. OvCa  
530 #7, #17 and #25; Fig. 5B). In contrast to 'terminally differentiated cells' (42), OvCa TILs with a  
531 'stem cell-like' CD39<sup>+</sup>PD1<sup>+</sup> phenotype were found in 7.3% of the CTLs (Table S5). This population  
532 showed the highest proportional variability with a maximum of 50.5% cells vs. a minimum of 0%  
533 as compared to other CD8<sup>+</sup> TIL populations (CV 208%). The frequency of CD8<sup>+</sup>CD39<sup>+</sup> and stem  
534 cell-like CD8<sup>+</sup>CD39<sup>+</sup>PD1<sup>+</sup> was negatively correlated (Spearman  $r = -0.63$ , Fig. S4B;  $P = 0.024$ ,  
535 Table S6). These results confirm the feasibility of extracting and expanding TIL populations from  
536 fresh OvCa tissue samples and identify heterogeneous, patient-specific immuno-phenotypes with  
537 potential relevance for immuno-oncological treatment approaches.

538  
539 **Specific TIL phenotypes isolated from OvCa tumor specimen correlate with regional lymph**  
540 **node metastasis**

541 We further analyzed the correlation between specific TIL populations and clinical follow-up patient  
542 data. OvCa patients with regional lymph node metastasis (N = 1) tended to present with  
543 significantly more extensive CD8<sup>+</sup> TIL infiltration in their tumors than those with no lymph node  
544 metastasis (N = 0) ( $P = 0.016$ ) (Fig. 5C). Moreover, the frequency of CD8<sup>+</sup> TILs appeared to  
545 significantly correlate with that of CD8<sup>+</sup>CD39<sup>+</sup> TILs in OvCa (Fig. 5C). Despite a small sample  
546 size, our data implicate a significant correlation between lymph node spread (N=1) and the  
547 presence of a CD8<sup>+</sup>CD39<sup>+</sup> population ( $P = 0.008$ ).

549  
550 **OvCa PDM killing by autologous TIL populations is enhanced by immune checkpoint**  
551 **inhibitor treatment**

552 To evaluate the functional, tumor cell killing capacity of autologous TILs on OvCa PDM and the  
553 corresponding treatment efficacy of established immune checkpoint inhibitors (CPI), we subjected  
554 co-cultures of TILs and PDM from OvCa #24 and #26 to image-based analysis of  
555 CPI-treatment response. A total of nine PDM were imaged per treatment (3 PDM per well in  
556 triplicates) and a dead:live PDM ratio was calculated according to the sum of measured  
557 fluorescent intensities (FI) (Fig. 5D-F). Addition of TILs to autologous PDM induced a basal killing  
558

559 effect in PDM in both models analyzed in the absence of CPI treatment (Fig. 5E-F). As the  
560 addition of matched isotype controls showed no additional effect in both co-culture models, we  
561 excluded the possibility of unspecific killing effects of CPI antibodies. TIL killing effects in OvCa  
562 #24 co-cultures were observed in response to treatment with either the combination of anti-PD1  
563 and anti-CTLA-4 (pembrolizumab + ipilimumab) or anti-PD-L1 and anti-CTLA-4 (atezolizumab +  
564 ipilimumab) ( $P = 0.039$ ) compared to isotype control treatment (Fig. 5E). Single agents induced  
565 no significant increase in PDM killing. In OvCa #26 CPI treatment almost doubled PDM killing  
566 (Fig. 5F). In comparison, co-cultures treated with ipilimumab ( $P = 0.004$ ) or atezolizumab ( $P <$   
567  $0.001$ ) showed significant PDM killing compared to untreated PDM. The killing effect of TILs was  
568 significantly amplified by atezolizumab treatment compared to co-culture controls (PDM+TIL:  $P =$   
569  $0.021$ ; PDM+TIL+IgG4:  $P = 0.018$ ; Fig. 5F), In line with this observation, respective OvCa PDM  
570 models showed weakly positive PD-L1 staining (Fig. S1). Further, atezolizumab treatment  
571 significantly increased the TIL killing effect towards PDM as compared to pembrolizumab ( $P =$   
572  $0.026$ ). Autologous CD8 TILs from both tested OvCa PDM models were composed of high  
573 amounts of tumor-specific, non-terminally differentiated CD8<sup>+</sup>CD39<sup>+</sup> TIL populations as compared  
574 to other OvCa TILs (Fig. 5B). Moreover, these CD8 TILs were prominently positive for CTLA-4,  
575 which might explain the observed increase in PDM killing in response to ipilimumab (Anti-CTLA4)  
576 treatment (Fig. 5B) Thus, the co-culture of autologous TILs and PDM offers the possibility to  
577 extent compound efficacy testing beyond chemotherapeutic compounds to immune oncological  
578 treatment approaches in a patient-specific setting.

## 579 **Discussion**

580  
581 Recently we could show the establishment of PDM from human glioblastoma tissue specimen  
582 containing important components of the tumor stroma (e.g. tumor-associated macrophages), and  
583 their application for the assessment of responses towards CSF1R- and PD1-targeting antibodies  
584 as well as the small molecule inhibitor Argyrin F (43, 44). In the present study, we have now  
585 further extended this approach to a patient-derived model system composed of PDM and  
586 autologous TILs extracted from a panel of primary OvCa tissue specimen and their in-depth

587 characterization by immunohistochemistry, protein profiling, immune cell phenotyping and  
588 focused compound efficacy testing. Our results show a 70% success rate for isolation of PDM  
589 with robust viability and in suitable amounts for further, multi-parametric downstream analyses.  
590 In-depth histopathological assessment of PDM sections confirmed the conservation of typical  
591 histological features of respective OvCa types by this model system. Importantly, the complexity  
592 of the ovarian cancer TME with respect to the presence of cancer-associated fibroblasts and  
593 extracellular matrix components incl. collagen and hyaluronan-binding protein observed in  
594 primary OvCa tissue sections was well conserved in PDM. The presence of these TME  
595 components has previously been correlated with tumor stage, prognosis, and progression and  
596 shown to substantially influence treatment responses (28, 45, 46). Interestingly, we could also  
597 identify immune cell infiltration within a subset of OvCa PDM, reflecting the immunogenicity of  
598 OvCa as previously reported (35, 36, 47).

599 While OvCa patient-derived organoids (PDO) were often studied by genomic and transcriptomic  
600 sequencing (6-8), we were the first (to our knowledge) to investigate inter-tumoral heterogeneity  
601 and differential drug response mechanisms by RPPA-based protein profiling in a patient-derived  
602 3D OvCa preclinical cell model. Here, analyses of a panel of >110 phospho- and total proteins  
603 allowed for the clustering of histologically similar OvCa PDM models, pathway activity profiling  
604 and investigation of on- and off target drug effects. Obtained RPPA protein profiles confirmed the  
605 heterogeneity of OvCa PDM observed via immunohistochemistry and previously reported for  
606 HGSC, the most common type of OvCa. Our work identified significant differences in the activity  
607 of cell cycle and MAPK/RTK pathways within analyzed OvCa PDM and enabled their distinction  
608 from a breast cancer derived PDM model by differential expression of OvCa tumor and stem cell  
609 markers as well as apoptosis-related proteins.

610 Six OvCa PDM models were applied for individualized compound efficacy testing of standard of  
611 care platinum-based therapy. For analyzed OvCa PDM models, we observed patient-specific  
612 heterogeneity of response towards chemotherapy. Correlation with RPPA protein profiling data  
613 allowed the allocation of individual PDM drug responses to specifically up- or down-regulated

614 signaling pathway activities and enabled the prediction of PDM models with high probability of  
615 response towards chemotherapy. In accordance with the ability of cytostatic drugs to induce  
616 apoptosis especially in actively dividing cells (48), our work identified additional correlation  
617 between proteins relevant for S- and G2/M- cell cycle phase progression and carboplatin  
618 response. Specifically, our data implicate that elevated abundances of Aurora A, Cyclin B1 and  
619 PCNA proteins may allow for identification of carboplatin treatment response. Furthermore and in  
620 line with previous reports, we confirmed that decreased DNA damage repair and the ability to  
621 undergo apoptosis (49) is associated with carboplatin treatment sensitivity in OvCa. This was  
622 illustrated by increased levels of cleaved Caspase-7 and cleaved PARP. Our results did not  
623 identify a correlation of carboplatin-resistance and markers of cancer stem cells (CSCs) (50, 51)  
624 or epithelial-to-mesenchymal transition (EMT) (52, 53). Instead, we found the cancer stem cell-  
625 related protein Nanog as well N-Cadherin strongly upregulated in carboplatin responding PDM.  
626 These differing results might arise from the fact that above-mentioned previous studies were  
627 performed in adherent cell lines and not within a patient-derived 3D tumor model. Importantly, we  
628 identified protein signatures of OvCa PDM allowing for the identification and prediction of PDM  
629 models with high probability of response towards chemotherapy or targeted therapy. The  
630 correlation of our results with clinical data indicated a significant correlation of carboplatin  
631 treatment response with prolonged metastasis-free survival of respective patients. Given the  
632 small sample cohort analyzed here, these results need to be interpreted with caution but warrant  
633 further investigation.

634 We further assessed proteomic changes upon PDM treatment such as effects on protein  
635 abundance, directed on- and off-target pathway effects and drug mechanism-of-action within  
636 OvCa PDM. In a carboplatin sensitive PDM model, we observed a time-dependent decrease in  
637 cell cycle- and an increase in apoptosis-inducing protein abundance. In parallel, we found a fast  
638 stress response upon treatment as indicated by an activated mTOR pathway with high S6RP and  
639 active phospho-S6RP levels (34). Overactive mTOR in combination with cell stress and the



640 inability of cells to adapt to cellular stress might be responsible for p53 elevation (54, 55) and  
641 driving cells into senescence or apoptosis (56, 57).

642 Apart from testing the response of OvCa PDM to conventional chemotherapy, we sought to  
643 investigate the applicability of this model system for efficacy assessment of immuno-oncological  
644 treatment approaches. For this aim, we applied immunophenotyping of autologous TIL  
645 populations followed by their co-culture with respective PDM in the presence and absence of  
646 immunotherapeutic mono- and combination treatment schedules. Immunosurveillance of cancer  
647 strongly depends on the composition of tumor-infiltrated immune cells and the degree of tumor  
648 tissue infiltration and is known to influence treatment efficacies. As a result, the idea of an  
649 immunoscore, identifying a patient's immunophenotype, emerged (58). Our work uncovered  
650 several immunophenotypes within expanded TILs from OvCa patients by multicolor flow  
651 cytometry compared to previous immunohistochemistry based analysis (59). As described by  
652 Sato *et al.* (2005) (35) and Zhang *et al.* (2003) (36) high numbers of intraepithelial CD8<sup>+</sup> TILs are  
653 associated with better prognosis in OvCa. We found that OvCa TILs were largely composed of  
654 CD4<sup>+</sup> rather than CD8<sup>+</sup> TILs. In this regard, OvCa models with high amounts of suppressive CD4<sup>+</sup>  
655 TILs and low numbers of CD8<sup>+</sup> TILs are suggested to have worse prognosis (60). In line with  
656 previous reports (61), we identified expression of CD39 in OvCa TIL populations, a marker that  
657 distinguishes between tumor-specific CTLs (CD39<sup>+</sup>) and bystander TILs (CD39<sup>-</sup>) (39, 40).

658 Interestingly, we found that CD8<sup>+</sup> TIL amounts correlated with that of CD8<sup>+</sup> CD39<sup>+</sup> TILs, and could  
659 confirm that these tumor-specific T cells constitute an exhausted, memory T cell like phenotype,  
660 as CD39 expression was limited to CD8<sup>+</sup>PD-1<sup>+</sup> TILs. Importantly, our results further demonstrated  
661 that co-cultures of PDM and autologous TILs could be applied to assess treatment efficacy of  
662 CPIs in a patient-specific setting. Such PDM-TIL co-culture systems could potentially be used to  
663 identify OvCa patients more likely to respond to cancer immunotherapy. In the limited OvCa  
664 tumor tissue cohort investigated here, OvCa tumors with regional lymph node metastasis  
665 contained higher numbers of CD8<sup>+</sup> and CD8<sup>+</sup>CD39<sup>+</sup> TILs. The co-culture models tested in our

666 study for response towards CPI treatment were derived from lymph-node spreading primary  
667 tumors, which might suggest that immunogenicity of OvCa increases upon metastasis.  
668 Limitations of our PDM model are currently the restricted number of PDM available from digestion  
669 of individual tumor tissue samples. From experience with different tumor types, an average of  
670 several hundred to several thousand microtumors can be isolated from fresh tissue samples. This  
671 number depends on the amount of tissue available for PDM isolation as well as tissue  
672 composition (including degree of fibrosis and necrosis). PDMs are therefore presently not suitable  
673 for high-throughput drug screening approaches, but for focused drug testing in late preclinical and  
674 translational drug development as well as in the context of precision oncology. Furthermore, the  
675 limitation of our present study with regard to sample size should be noted. In future follow-up  
676 studies with larger cohorts we plan to confirm our findings.

677

## 678 **Conclusions**

679

680 Patient-derived microtumors isolated from OvCa tumor specimen represent a novel ex vivo  
681 tumor model for OvCa displaying histopathological similarities to corresponding primary patient  
682 tumors and revealing intertumoral heterogeneity as evidenced by immunohistochemical and  
683 protein profiling analyses. The combination of functional drug testing with analyses of protein  
684 signaling pathways and drug-mode of action enabled the identification of PDM models  
685 susceptible to platinum-based treatment and allowed for the prediction of individual therapeutic  
686 sensitivity. Parallel isolation and culturing of autologous TILs further allowed for the  
687 characterization of patient-individual immune-phenotypes as well as the assessment of  
688 responses towards immunotherapy in PDM-TIL co-cultures. While the rapid PDM/TIL extraction  
689 procedure and quick availability of resulting datasets within 3-4 weeks is in good accordance with  
690 timelines of clinical decision making, we plan to confirm our findings in future studies with larger  
691 sample cohorts.

692

693

694

695

696 **List of abbreviations**

697

698 **PDM:** Patient-derived microtumors

699 **TIL:** Tumor-infiltrating lymphocytes

700 **FFPE:** Formalin-fixed paraffin-embedded

701 **RPPA:** Reverse Phase Protein Array

702 **OvCa:** Ovarian cancer

703 **HGSC:** High-grade serous carcinoma

704 **PDO:** Patient-derived organoids

705 **TAM:** Tumor-associated macrophages

706 **FIGO:** International Federation of Gynecology and Obstetrics

707 **IL-2/7/15:** Interleukine-2/7/15

708 **FGF-basic:** Basic fibroblast growth factor

709 **BSA:** Bovine serum albumin

710 **DMSO:** Dimethylsulfoxid

711 **BC:** Breast cancer

712 **HCL:** Hierarchical Clustering

713 **MeV:** MultiExperiment Viewer

714 **RFU:** Relative fluorescent unit

715 **FC:** Fold change

716 **PTT:** Primary tumor tissue

717 **H&E:** Hematoxylin and Eosin staining

718 **WT1:** Wilms tumor 1

719 **MSLN:** Mesothelin

720 **CA125:** Cancer-antigen 125

721 **ECM:** Extracellular matrix

722 **FAP $\alpha$ :** Fibroblast activation protein  $\alpha$

723 **CAF:** Cancer associated fibroblast

724 **C1QBP:** Hyaluronan binding protein 1

725 **TME:** Tumor microenvironment

726 **CPI:** Checkpoint-inhibitors

727 **CSC:** Cancer-stem cells

728

729

730

731

732

733

734

735

736

737

738

739

740

741

742

743

744

745

746

747

748

749

750

751

752

753

754

755

756

757

758

759

760

761

762

763

764

765

766

767

768

769

770

771

772

773

774 **Declarations**

775

776 **Ethics Approval and consent to participate**

777

778 The study was conducted according to the guidelines of the Declaration of Helsinki and approved

779 by the local Ethics Committee. The use of human samples was approved by the local Ethics

780 Commission at the Medical Faculty of Tuebingen under the reference numbers

781 IRB#275/2017BO2 and IRB#788/2018BO2. All patients enrolled gave their informed consent to

782 participate in the study.

783

784 **Consent for publication:**

785

786 Not applicable.

787

788

789 **Availability of data and material:**

790

791 All data needed to evaluate the conclusions of the paper are included in this published article and

792 its supplementary information file. Material and further data are available upon request after

793 signature of an MTA from the corresponding authors.

794

795 **Competing interests:**

796 AH received consulting and speaking fees from GSK, AstraZeneca and Clovis. NA, AK, BG, ALK,

797 AS, SYB, MP, KSL and CS declare no competing interests.

798 **Funding:**

799

800 This work received financial support from the Ministry of Baden-Wuerttemberg for Economic

801 Affairs, Labor and Tourism (grant 3-4332.62-HSG/84).

802 **Authors' contributions:**

803

804 Conceptualization and design of the study: NA, CS, MP, KSL, SYB and AH; Data collection, data

805 analysis, investigation and interpretation: NA, BG, MP, AK, ALK, AS, SYB and CS; Writing –

806 original draft: NA and CS; Writing – review and editing: NA, CS, MP, ALK, KSL, AK, SYB, AH and

807 AS; Visualization: NA, CS and SYB; Supervision: CS and AK; Project administration: NA, CS and

808 AK; All authors have read and approved the final manuscript.

809 **Acknowledgements:**

810

811 We gratefully acknowledge the Department of Women's Health, Women's University Hospital,

812 Tuebingen University Hospital for excellent support, helpful discussions and providing fresh tumor

813 tissue biopsies and corresponding FFPE material. We thank all patients and healthy volunteers

814 enrolled for giving their informed consent for secondary use of residual tissue, respectively.

815

816 **References**

817

- 818 1. Bray F, Ferlay J, Soerjomataram I, Siegel RL, Torre LA, Jemal A. Global cancer statistics  
819 2018: GLOBOCAN estimates of incidence and mortality worldwide for 36 cancers in 185  
820 countries. *CA Cancer J Clin.* 2018;68(6):394-424.
- 821 2. Izar B, Tirosh I, Stover EH, Wakiro I, Cuoco MS, Alter I, et al. A single-cell landscape of  
822 high-grade serous ovarian cancer. *Nat Med.* 2020;26(8):1271-9.
- 823 3. Network TCGAR. Integrated genomic analyses of ovarian carcinoma. *Nature.*  
824 2011;474(7353):609-15.
- 825 4. Zhang H, Liu T, Zhang Z, Payne SH, Zhang B, McDermott JE, et al. Integrated  
826 Proteogenomic Characterization of Human High-Grade Serous Ovarian Cancer. *Cell.*  
827 2016;166(3):755-65.
- 828 5. Verduin M, Hoeben A, De Ruyscher D, Vooijs M. Patient-Derived Cancer Organoids as  
829 Predictors of Treatment Response. *Front Oncol.* 2021;11(820):641980.
- 830 6. Chen H, Gotimer K, De Souza C, Tepper CG, Karnezis AN, Leiserowitz GS, et al. Short-  
831 term organoid culture for drug sensitivity testing of high-grade serous carcinoma.  
832 *Gynecol Oncol.* 2020;157(3):783-92.
- 833 7. Kopper O, De Witte CJ, Löhmußaar K, Valle-Inclan JE, Hami N, Kester L, et al. An  
834 organoid platform for ovarian cancer captures intra- and interpatient heterogeneity. *Nat*  
835 *Med.* 2019;25(5):838-49.
- 836 8. Hill SJ, Decker B, Roberts EA, Horowitz NS, Muto MG, Worley MJ, Jr., et al. Prediction of  
837 DNA Repair Inhibitor Response in Short-Term Patient-Derived Ovarian Cancer  
838 Organoids. *Cancer Discov.* 2018;8(11):1404-21.
- 839 9. Neal JT, Li X, Zhu J, Giangarra V, Grzeskowiak CL, Ju J, et al. Organoid Modeling of the  
840 Tumor Immune Microenvironment. *Cell.* 2018;175(7):1972-88.e16.
- 841 10. Wensink GE, Elias SG, Mullenders J, Koopman M, Boj SF, Kranenburg OW, et al. Patient-  
842 derived organoids as a predictive biomarker for treatment response in cancer patients.  
843 *npj Precision Oncology.* 2021;5(1).
- 844 11. Kondo J, Endo H, Okuyama H, Ishikawa O, Iishi H, Tsujii M, et al. Retaining cell-cell  
845 contact enables preparation and culture of spheroids composed of pure primary cancer  
846 cells from colorectal cancer. *Proc Natl Acad Sci U S A.* 2011;108(15):6235-40.
- 847 12. Shuford S, Wilhelm C, Rayner M, Elrod A, Millard M, Mattingly C, et al. Prospective  
848 Validation of an Ex Vivo, Patient-Derived 3D Spheroid Model for Response Predictions in  
849 Newly Diagnosed Ovarian Cancer. *Sci Rep.* 2019;9(1):11153.
- 850 13. Pirnia F, Pawlak M, Thallinger GG, Gierke B, Templin MF, Kappeler A, et al. Novel  
851 functional profiling approach combining reverse phase protein microarrays and human

- 852 3-D ex vivo tissue cultures: expression of apoptosis-related proteins in human colon  
853 cancer. *Proteomics*. 2009;9(13):3535-48.
- 854 14. Pawlak M, Carragher NO. Reverse Phase Protein Arrays elucidate mechanisms-of-action  
855 and phenotypic response in 2D and 3D models. *Drug Discovery Today: Technologies*.  
856 2017;23:7-16.
- 857 15. Kresbach GM, Pawlak M. High Precision RPPA: Concept, Features, and Application  
858 Performance of the Integrated Zeptosens Platform. *Adv Exp Med Biol*. 2019;1188:31-59.
- 859 16. Iglewicz B, Hoaglin DC. How to detect and handle outliers. Milwaukee, Wis.: Milwaukee,  
860 Wis. : ASQC Quality Press; 1993. ix, 87 p. p.
- 861 17. Köbel M, Rahimi K, Rambau PF, Naugler C, Le Page C, Meunier L, et al. An  
862 Immunohistochemical Algorithm for Ovarian Carcinoma Typing. *Int J Gynecol Pathol*.  
863 2016;35(5):430-41.
- 864 18. Hilliard T. The Impact of Mesothelin in the Ovarian Cancer Tumor Microenvironment.  
865 *Cancers (Basel)*. 2018;10(9):277.
- 866 19. Hassan R, Kreitman RJ, Pastan I, Willingham MC. Localization of Mesothelin in Epithelial  
867 Ovarian Cancer. *Appl Immunohistochem Mol Morphol*. 2005;13(3):243-7.
- 868 20. Chang M-C, Chen C-A, Chen P-J, Chiang Y-C, Chen Y-L, Mao T-L, et al. Mesothelin  
869 enhances invasion of ovarian cancer by inducing MMP-7 through MAPK/ERK and JNK  
870 pathways. *Biochem J*. 2012;442(2):293-302.
- 871 21. Tornos C, Soslow R, Chen S, Akram M, Hummer AJ, Abu-Rustum N, et al. Expression of  
872 WT1, CA 125, and GCDPF-15 as useful markers in the differential diagnosis of primary  
873 ovarian carcinomas versus metastatic breast cancer to the ovary. *Am J Surg Pathol*.  
874 2005;29(11):1482-9.
- 875 22. Kriplani D, Patel MM. Immunohistochemistry: A diagnostic aid in differentiating primary  
876 epithelial ovarian tumors and tumors metastatic to the ovary. *South Asian Journal of  
877 Cancer*. 2013;02(04):254-8.
- 878 23. Neunteufel W, Breitenecker G. Tissue expression of CA 125 in benign and malignant  
879 lesions of ovary and fallopian tube: a comparison with CA 19-9 and CEA. *Gynecol Oncol*.  
880 1989;32(3):297-302.
- 881 24. Cox TR. The matrix in cancer. *Nature Reviews Cancer*. 2021;21(4):217-38.
- 882 25. Bhat R, Bissell MJ. Of plasticity and specificity: dialectics of the microenvironment and  
883 macroenvironment and the organ phenotype. *WIREs Developmental Biology*.  
884 2014;3(2):147-63.
- 885 26. Roskelley CD, Bissell MJ. The dominance of the microenvironment in breast and ovarian  
886 cancer. *Semin Cancer Biol*. 2002;12(2):97-104.
- 887 27. Mhawech-Fauceglia P, Yan L, Sharifian M, Ren X, Liu S, Kim G, et al. Stromal Expression  
888 of Fibroblast Activation Protein Alpha (FAP) Predicts Platinum Resistance and Shorter  
889 Recurrence in patients with Epithelial Ovarian Cancer. *Cancer Microenviron*.  
890 2015;8(1):23-31.
- 891 28. Nissen NI, Karsdal M, Willumsen N. Collagens and Cancer associated fibroblasts in the  
892 reactive stroma and its relation to Cancer biology. *J Exp Clin Cancer Res*. 2019;38(1):115.
- 893 29. Saha P, Datta K. Multi-functional, multicompartmental hyaluronan-binding protein 1  
894 (HABP1/p32/gC1qR): implication in cancer progression and metastasis. *Oncotarget*.  
895 2018;9(12):10784-807.

- 896 30. Longacre M, Snyder N, Housman G, Leary M, Lapinska K, Heerboth S, et al. A  
897 Comparative Analysis of Genetic and Epigenetic Events of Breast and Ovarian Cancer  
898 Related to Tumorigenesis. *Int J Mol Sci.* 2016;17(5):759.
- 899 31. Liston DR, Davis M. Clinically Relevant Concentrations of Anticancer Drugs: A Guide for  
900 Nonclinical Studies. *Clin Cancer Res.* 2017;23(14):3489-98.
- 901 32. Ovejero S, Bueno A, Sacristán MP. Working on Genomic Stability: From the S-Phase to  
902 Mitosis. *Genes.* 2020;11(2):225.
- 903 33. Holder J, Poser E, Barr FA. Getting out of mitosis: spatial and temporal control of mitotic  
904 exit and cytokinesis byPP1 andPP2A. *FEBS Lett.* 2019;593(20):2908-24.
- 905 34. Aramburu J, Ortells MC, Tejedor S, Buxadé M, López-Rodríguez C. Transcriptional  
906 regulation of the stress response by mTOR. *Science Signaling.* 2014;7(332):re2.
- 907 35. Sato E, Olson SH, Ahn J, Bundy B, Nishikawa H, Qian F, et al. Intraepithelial CD8+ tumor-  
908 infiltrating lymphocytes and a high CD8+/regulatory T cell ratio are associated with  
909 favorable prognosis in ovarian cancer. *Proc Natl Acad Sci U S A.* 2005;102(51):18538-43.
- 910 36. Zhang L, Conejo-Garcia JR, Katsaros D, Gimotty PA, Massobrio M, Regnani G, et al.  
911 Intratumoral T Cells, Recurrence, and Survival in Epithelial Ovarian Cancer. *New Engl J*  
912 *Med.* 2003;348(3):203-13.
- 913 37. Hamanishi J, Mandai M, Iwasaki M, Okazaki T, Tanaka Y, Yamaguchi K, et al.  
914 Programmed cell death 1 ligand 1 and tumor-infiltrating CD8+ T lymphocytes are  
915 prognostic factors of human ovarian cancer. *Proceedings of the National Academy of*  
916 *Sciences.* 2007;104(9):3360-5.
- 917 38. Ye Q, Song DG, Poussin M, Yamamoto T, Best A, Li C, et al. CD137 Accurately Identifies  
918 and Enriches for Naturally Occurring Tumor-Reactive T Cells in Tumor. *Clin Cancer Res.*  
919 2014;20(1):44-55.
- 920 39. Duhén T, Duhén R, Montler R, Moses J, Moudgil T, de Miranda NF, et al. Co-expression  
921 of CD39 and CD103 identifies tumor-reactive CD8 T cells in human solid tumors. *Nat*  
922 *Commun.* 2018;9(1):2724.
- 923 40. Simoni Y, Becht E, Fehlings M, Loh CY, Koo S-L, Teng KWW, et al. Bystander CD8+ T cells  
924 are abundant and phenotypically distinct in human tumour infiltrates. *Nature.*  
925 2018;557(7706):575-9.
- 926 41. Canale FP, Ramello MC, Núñez N, Furlan CLA, Bossio SN, Serrán MG, et al. CD39  
927 Expression Defines Cell Exhaustion in Tumor-Infiltrating CD8+T Cells. *Cancer Res.*  
928 2018;78(1):115-28.
- 929 42. Jansen CS, Prokhnevskaya N, Master VA, Sanda MG, Carlisle JW, Bilen MA, et al. An intra-  
930 tumoral niche maintains and differentiates stem-like CD8 T cells. *Nature.*  
931 2019;576(7787):465-70.
- 932 43. Przystal JM, Becker H, Canjuga D, Tsiami F, Anderle N, Keller A-L, et al. Targeting CSF1R  
933 Alone or in Combination with PD1 in Experimental Glioma. *Cancers (Basel).*  
934 2021;13(10):2400.
- 935 44. Walter B, Canjuga D, Yüz SG, Ghosh M, Bozko P, Przystal JM, et al. Argyrin F Treatment-  
936 Induced Vulnerabilities Lead to a Novel Combination Therapy in Experimental Glioma.  
937 *Advanced Therapeutics.* 2021:2100078.
- 938 45. Yu G, Wang J. Significance of hyaluronan binding protein (HABP1/P32/gC1qR) expression  
939 in advanced serous ovarian cancer patients. 2013;94(1):210-5.
- 940 46. Yu H, Liu Q, Xin T, Xing L, Dong G, Jiang Q, et al. Elevated expression of hyaluronic acid  
941 binding protein 1 (HABP1)/P32/C1QBP is a novel indicator for lymph node and



- 942 peritoneal metastasis of epithelial ovarian cancer patients. *Tumor Biol.* 2013;34(6):3981-  
943 7.
- 944 47. Barnett B, Kryczek I, Cheng P, Zou W, Curiel TJ. Regulatory T cells in ovarian cancer:  
945 biology and therapeutic potential. *Am J Reprod Immunol.* 2005;54(6):369-77.
- 946 48. Valeriote F, van Putten L. Proliferation-dependent cytotoxicity of anticancer agents: a  
947 review. *Cancer Res.* 1975;35(10):2619-30.
- 948 49. Vasey PA. Resistance to chemotherapy in advanced ovarian cancer: mechanisms and  
949 current strategies. *Br J Cancer.* 2003;89(S3):23-8.
- 950 50. Haygood CLW. Ovarian cancer stem cells: Can targeted therapy lead to improved  
951 progression-free survival? *World Journal of Stem Cells.* 2014;6(4):441.
- 952 51. Bapat SA, Mali AM, Koppikar CB, Kurrey NK. Stem and Progenitor-Like Cells Contribute  
953 to the Aggressive Behavior of Human Epithelial Ovarian Cancer. *Cancer Res.*  
954 2005;65(8):3025-9.
- 955 52. Deng J, Wang L, Chen H, Hao J, Ni J, Chang L, et al. Targeting epithelial-mesenchymal  
956 transition and cancer stem cells for chemoresistant ovarian cancer. *Oncotarget.*  
957 2016;7(34):55771-88.
- 958 53. Liu S, Sun J, Cai B, Xi X, Yang L, Zhang Z, et al. NANOG regulates epithelial-mesenchymal  
959 transition and chemoresistance through activation of the STAT3 pathway in epithelial  
960 ovarian cancer. *Tumor Biol.* 2016;37(7):9671-80.
- 961 54. Lee CH, Inoki K, Karbowiczek M, Petroulakis E, Sonenberg N, Henske EP, et al.  
962 Constitutive mTOR activation in TSC mutants sensitizes cells to energy starvation and  
963 genomic damage via p53. *The EMBO journal.* 2007;26(23):4812-23.
- 964 55. Vadysirisack DD, Baenke F, Ory B, Lei K, Ellisen LW. Feedback control of p53 translation  
965 by REDD1 and mTORC1 limits the p53-dependent DNA damage response. *Mol Cell Biol.*  
966 2011;31(21):4356-65.
- 967 56. Leontieva OV, Blagosklonny MV. DNA damaging agents and p53 do not cause  
968 senescence in quiescent cells, while consecutive re-activation of mTOR is associated  
969 with conversion to senescence. *Aging (Albany NY).* 2010;2(12):924-35.
- 970 57. Astle MV, Hannan KM, Ng PY, Lee RS, George AJ, Hsu AK, et al. AKT induces senescence  
971 in human cells via mTORC1 and p53 in the absence of DNA damage: implications for  
972 targeting mTOR during malignancy. *Oncogene.* 2012;31(15):1949-62.
- 973 58. Gajewski TF, Schreiber H, Fu Y-X. Innate and adaptive immune cells in the tumor  
974 microenvironment. *Nat Immunol.* 2013;14(10):1014-22.
- 975 59. Hwang WT, Adams SF, Tahirovic E, Hagemann IS, Coukos G. Prognostic significance of  
976 tumor-infiltrating T cells in ovarian cancer: a meta-analysis. *Gynecol Oncol.*  
977 2012;124(2):192-8.
- 978 60. Curiel TJ, Coukos G, Zou L, Alvarez X, Cheng P, Mottram P, et al. Specific recruitment of  
979 regulatory T cells in ovarian carcinoma fosters immune privilege and predicts reduced  
980 survival. *Nat Med.* 2004;10(9):942-9.
- 981 61. Leem G, Park J, Jeon M, Kim E-S, Kim SW, Lee YJ, et al. 4-1BB co-stimulation further  
982 enhances anti-PD-1-mediated reinvigoration of exhausted CD39<sup>+</sup> CD8 T  
983 cells from primary and metastatic sites of epithelial ovarian cancers. *Journal for*  
984 *ImmunoTherapy of Cancer.* 2020;8(2):e001650.

985

986

987 **Figure legends**

988

989 **Figure 1. Patient-derived 3D microtumors (PDM) derived from primary OvCa tumor**

990 **specimen show high viability (A)** Efficiency of isolating OvCa PDM from a total of  $n = 19$  fresh  
991 primary OvCa tumor tissues samples. PDM were isolated from  $n = 14$  specimen with a success  
992 rate of 73.7%. **(B)** Viability of OvCa PDM models. Exemplary 2D images from 3D projections of  $n$   
993 = 4 OvCa PDM models confirm high viability according to Calcein-AM (viable cells) and SYTOX™  
994 Orange (dead cells) staining. **(C)** Percentage of viable and dead cells in OvCa PDM. Viability was  
995 assessed by an image-based analysis (see SI Methods) in  $n = 4$  OvCa PDM models shown in  
996 (B). Data are shown as mean values with SEM from at least  $n = 3$  PDM of each model. \* $P < 0.05$ ,  
997 \*\* $P < 0.01$ , \*\*\* $P < 0.001$ , multiple paired t-test with Holm-Šídák's post hoc test. Scale bar 50  $\mu\text{m}$ .

998 **Figure 1. OvCa PDM resemble histopathological features of the corresponding primary**

999 **tumor tissue.** Hematoxylin and Eosin (H&E) staining of OvCa PDM and corresponding primary  
1000 tumor tissue (PTT) sections revealed features of malignant cells (incl. giant cells with more than  
1001 one nucleolus, hyperchromatic cells with dark nuclei and high nuclei:cytoplasm ratio) confirming  
1002 the cancerous origin. Qualitative characterization of OvCa PDM was performed by DAB  
1003 immunohistochemical staining of FFPE sections (3  $\mu\text{m}$ ). Expression of OvCa histotype specific  
1004 markers (p53, WT1), tumor markers (CA125, MSLN), tumor-associated macrophages (CD163),  
1005 immune/tumor marker (PD-L1), cancer-associated fibroblasts (FAP $\alpha$ ) and extracellular matrix  
1006 components (Hyaluronan C1QBP, Collagen I) within PDMs is shown. Scale bars indicate 500  $\mu\text{m}$   
1007 for PTT; 50  $\mu\text{m}$  for PDM; 20  $\mu\text{m}$  for magnifications (PTT and PDM). FAP $\alpha$ , cancer-associated  
1008 fibroblast protein alpha; C1QBP, hyaluronan binding protein; WT1, wilms tumor 1; MSLN,  
1009 mesothelin.

1010 **Figure 3. RPPA protein profiling of OvCa PDM identifies significant differences in active**

1011 **protein signaling pathways as molecular basis for OvCa PDM drug treatment responses.**

1012 **(A)** Protein heat map covering 116 analytes analyzed in OvCa PDM ( $n = 7$ ) and BC PDM ( $n = 1$ )  
1013 generated from sample sizes of  $n = 100$ -150 PDM. Protein abundances for each analyte are

1014 displayed as median-centered, log<sub>2</sub>-transformed NFI signals. Samples were subjected to  
1015 hierarchical clustering using Euclidean distance (complete linkage). **(B)** Activation state of  
1016 different pathways in the different OvCa PDM models. Proteins related to an “active” pathway  
1017 were selected for each of the plotted pathways (see Table S4). Protein signals are shown as  
1018 median-centered, log<sub>2</sub> transformed NFI signals. Dotted lines indicate log<sub>2</sub> values of +0.6 (fold  
1019 change of +1.5) and -1 log<sub>2</sub> (fold change of -0.5). Data are shown as box and whiskers plots with  
1020 minimum and maximum range. \**P* < 0.05, \*\**P* < 0.01, \*\*\**P* < 0.001, Kruskal-Wallis test with  
1021 Dunn’s post hoc test. **(C)** Cytotoxicity measurement of indicated OvCa PDM models treated with  
1022 standard platinum-based chemotherapy (Carboplatin; final concentrations 75, 100 and 125 μM).  
1023 Four replicates per treatment with *n* = 15 PDM per well were performed and measured after 24 h,  
1024 48 h and 72 h. Signals were measured as RFU (Relative Fluorescent Unit), background corrected  
1025 and normalized to vehicle control (DMSO). Data are shown as mean values. Statistical  
1026 significances compared to vehicle control or H<sub>2</sub>O are shown. \**P* < 0.05, \*\**P* < 0.01, \*\*\**P* < 0.001,  
1027 Two-way ANOVA with Bonferroni’s multiple comparison test. Carbo: carboplatin

1028 **Figure 4. Carboplatin drug response in OvCa PDM correlates with the activity of diverse**  
1029 **signaling pathways.** **(A)** Heat map of protein abundances (calculated from median-centered NFI  
1030 values) averaged over carboplatin responder and non-responder OvCa PDM. Carboplatin  
1031 responders and non-responders were grouped according to significant treatment effects from  
1032 functional compound testing (Fig. 3C). Only proteins with >20% increased or decreased  
1033 abundance between responder and non-responder group were selected. Data was HCL clustered  
1034 with Euclidean distance (average linkage). **(B)** Signaling pathway activation in carboplatin  
1035 responder vs. non-responder OvCa PDM. Proteins were sorted according to their pathway  
1036 affiliation and according to upregulation or downregulation within responder group. \**P* < 0.05, \*\**P*  
1037 < 0.01, \*\*\**P* < 0.001, Mann-Whitney-U-test. R, responder; Non-R, Non-responder. **(C)** Proteomic  
1038 on- and off-target pathway effects in carboplatin-treated (75 μM) OvCa #24 PDM analyzed by  
1039 RPPA. Treated PDM were analyzed from an immediate (0.5 h), an early (4 h) and a late (72 h)  
1040 treatment time. For each time point, protein values are displayed as log<sub>2</sub>-transformed treatment-

1041 to-control signal ratios (TR) calculated from NFI signals of treated PDM and corresponding  
1042 vehicle control (DMSO). Only proteins with >50% differential protein abundance compared to  
1043 vehicle control were selected. Straight lines above plots indicate statistical significances  
1044 compared to vehicle control. \* $P < 0.05$ , \*\* $P < 0.01$ , \*\*\* $P < 0.001$ , One-way ANOVA using  
1045 nonparametric Kruskal-Wallis with Dunn's ad hoc test.

1046 **Figure 5. CPI treatment in OvCa PDM-TIL co-cultures increased functional TIL killing**  
1047 **capacity.** Autologous TIL populations were isolated and expanded from OvCa tissue specimen.  
1048 **(A)** Percentages of different TIL populations within CD3, CD8 and CD4 positive T cells of different  
1049 models were quantified by multicolor flow cytometry. Data are shown as means  $\pm$  SEM of at least  
1050  $n = 10$  OvCa samples. \* $P < 0.05$ , \*\* $P < 0.01$ , \*\*\* $P < 0.001$ , ANOVA with Holm-Šídák's post hoc  
1051 test. **(B)** Phenotypes of extracted TIL populations shown separately for each OvCa model.  
1052 Pembro: pembrolizumab 60  $\mu\text{g/ml}$ ; Ipilim: ipilimumab 50  $\mu\text{g/ml}$ ; Atezo: atezolizumab 50  $\mu\text{g/ml}$ . **(C)**  
1053 Percentages of CD8<sup>+</sup> and CD8<sup>+</sup>CD39<sup>+</sup> TILs in OvCa patients with lymph node spread ( $N = 1$ ) and  
1054 without lymph node spread ( $N = 0$ ). All points with median are shown. \* $P < 0.05$ , \*\* $P < 0.01$ ,  
1055 Mann-Whitney-U-test. **(D)** PDM killing effects were measured in an image-based assay format as  
1056 ratio of fluorescent intensities (FI) of dead cells vs. live PDM cells. Per treatment  $n = 3$  PDM in  
1057 three replicates were analyzed. Masks for viable PDM (Calcein-AM staining), dead cells  
1058 (SYTOX™ Orange dead cell staining) and TILs (CellTracker™ Deep Red staining) were applied  
1059 using Imaris 8.0 software. Scale bars indicate 50  $\mu\text{m}$ . FI from TILs were subtracted from the total  
1060 dead FI. **(E-F)** Killing effects of autologous TILs on corresponding PDM in co-cultures treated with  
1061 immune checkpoint inhibitors (CPI). TILs of OvCa #24 **(D)** and #26 **(E)** were co-cultured with  $n =$   
1062 15 PDM using an E:T ratio of 4:1 and treated with CPI either alone or in combination. \* $P < 0.05$ ,  
1063 \*\* $P < 0.01$ , \*\*\* $P < 0.001$ , ANOVA with Holm-Šídák's post hoc test.

A

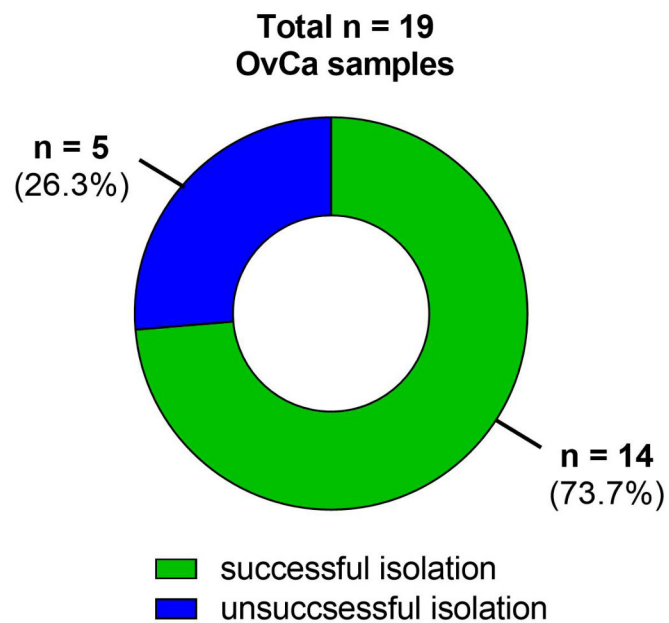

B

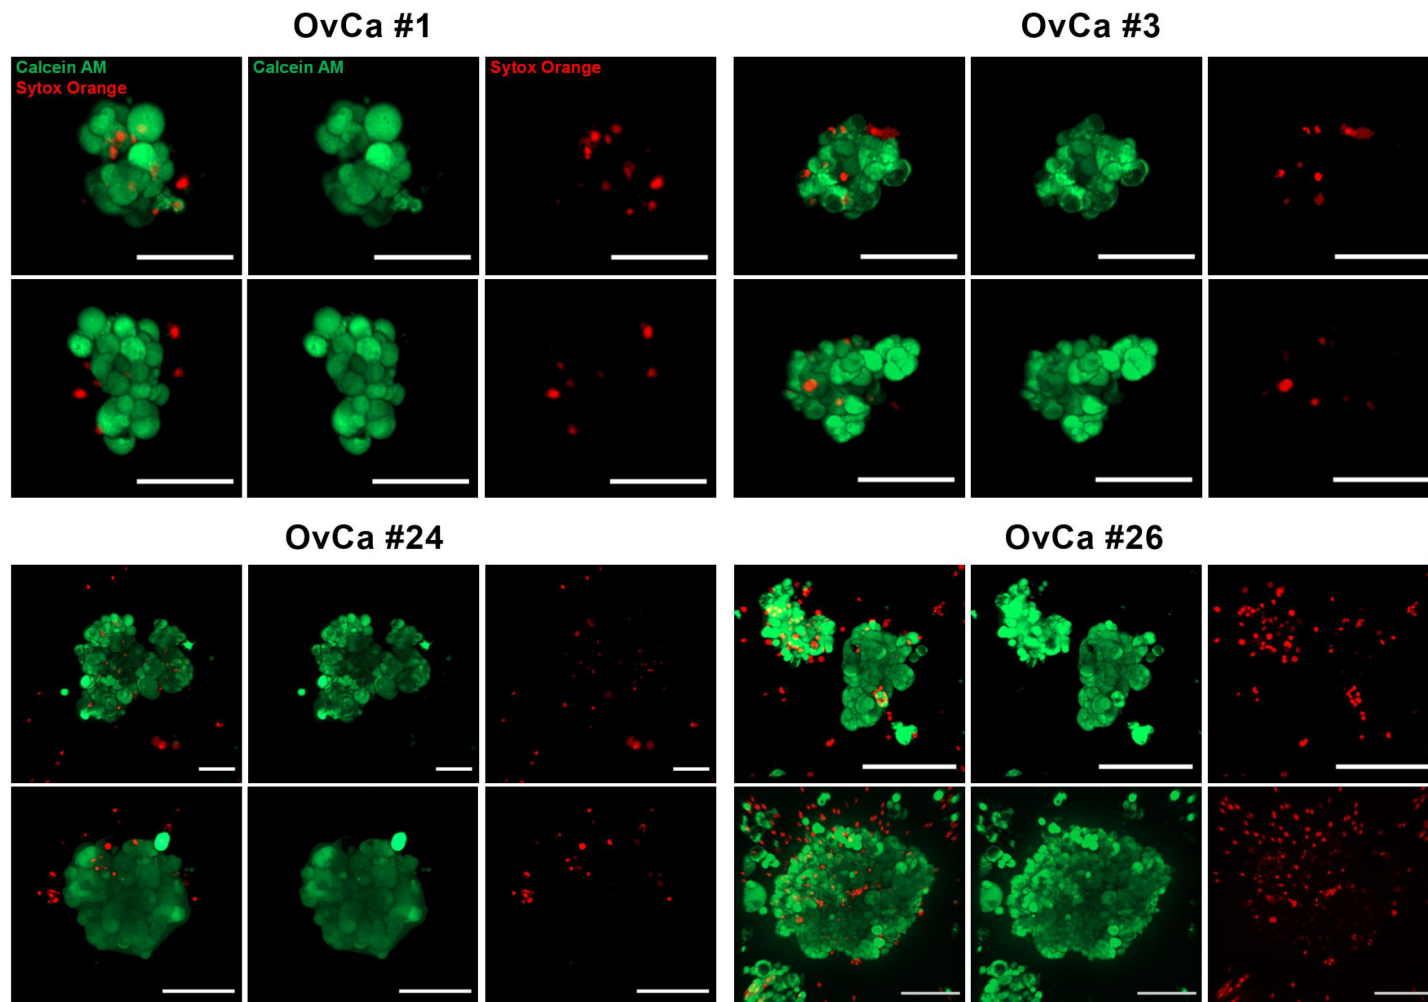

C

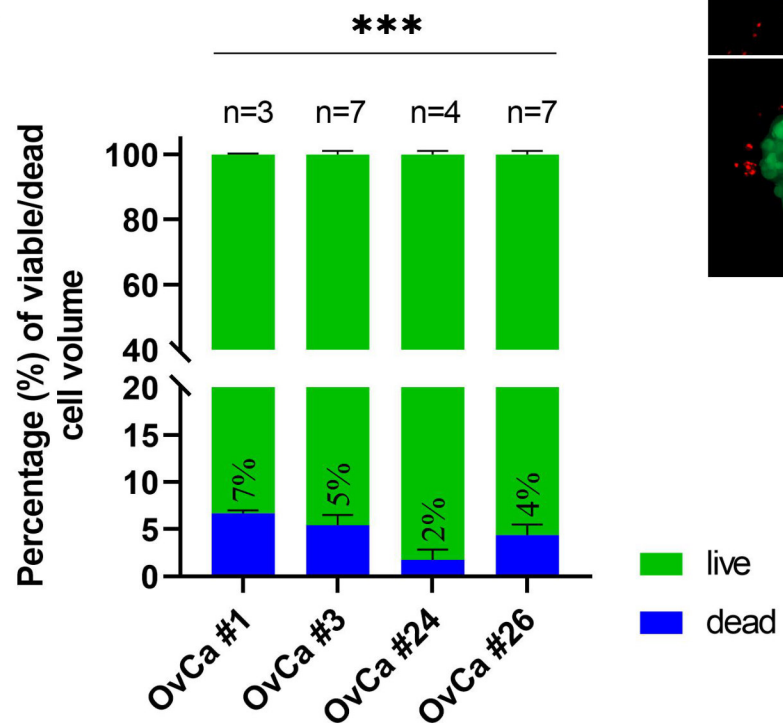

OvCa #17

OvCa #18

OvCa #23

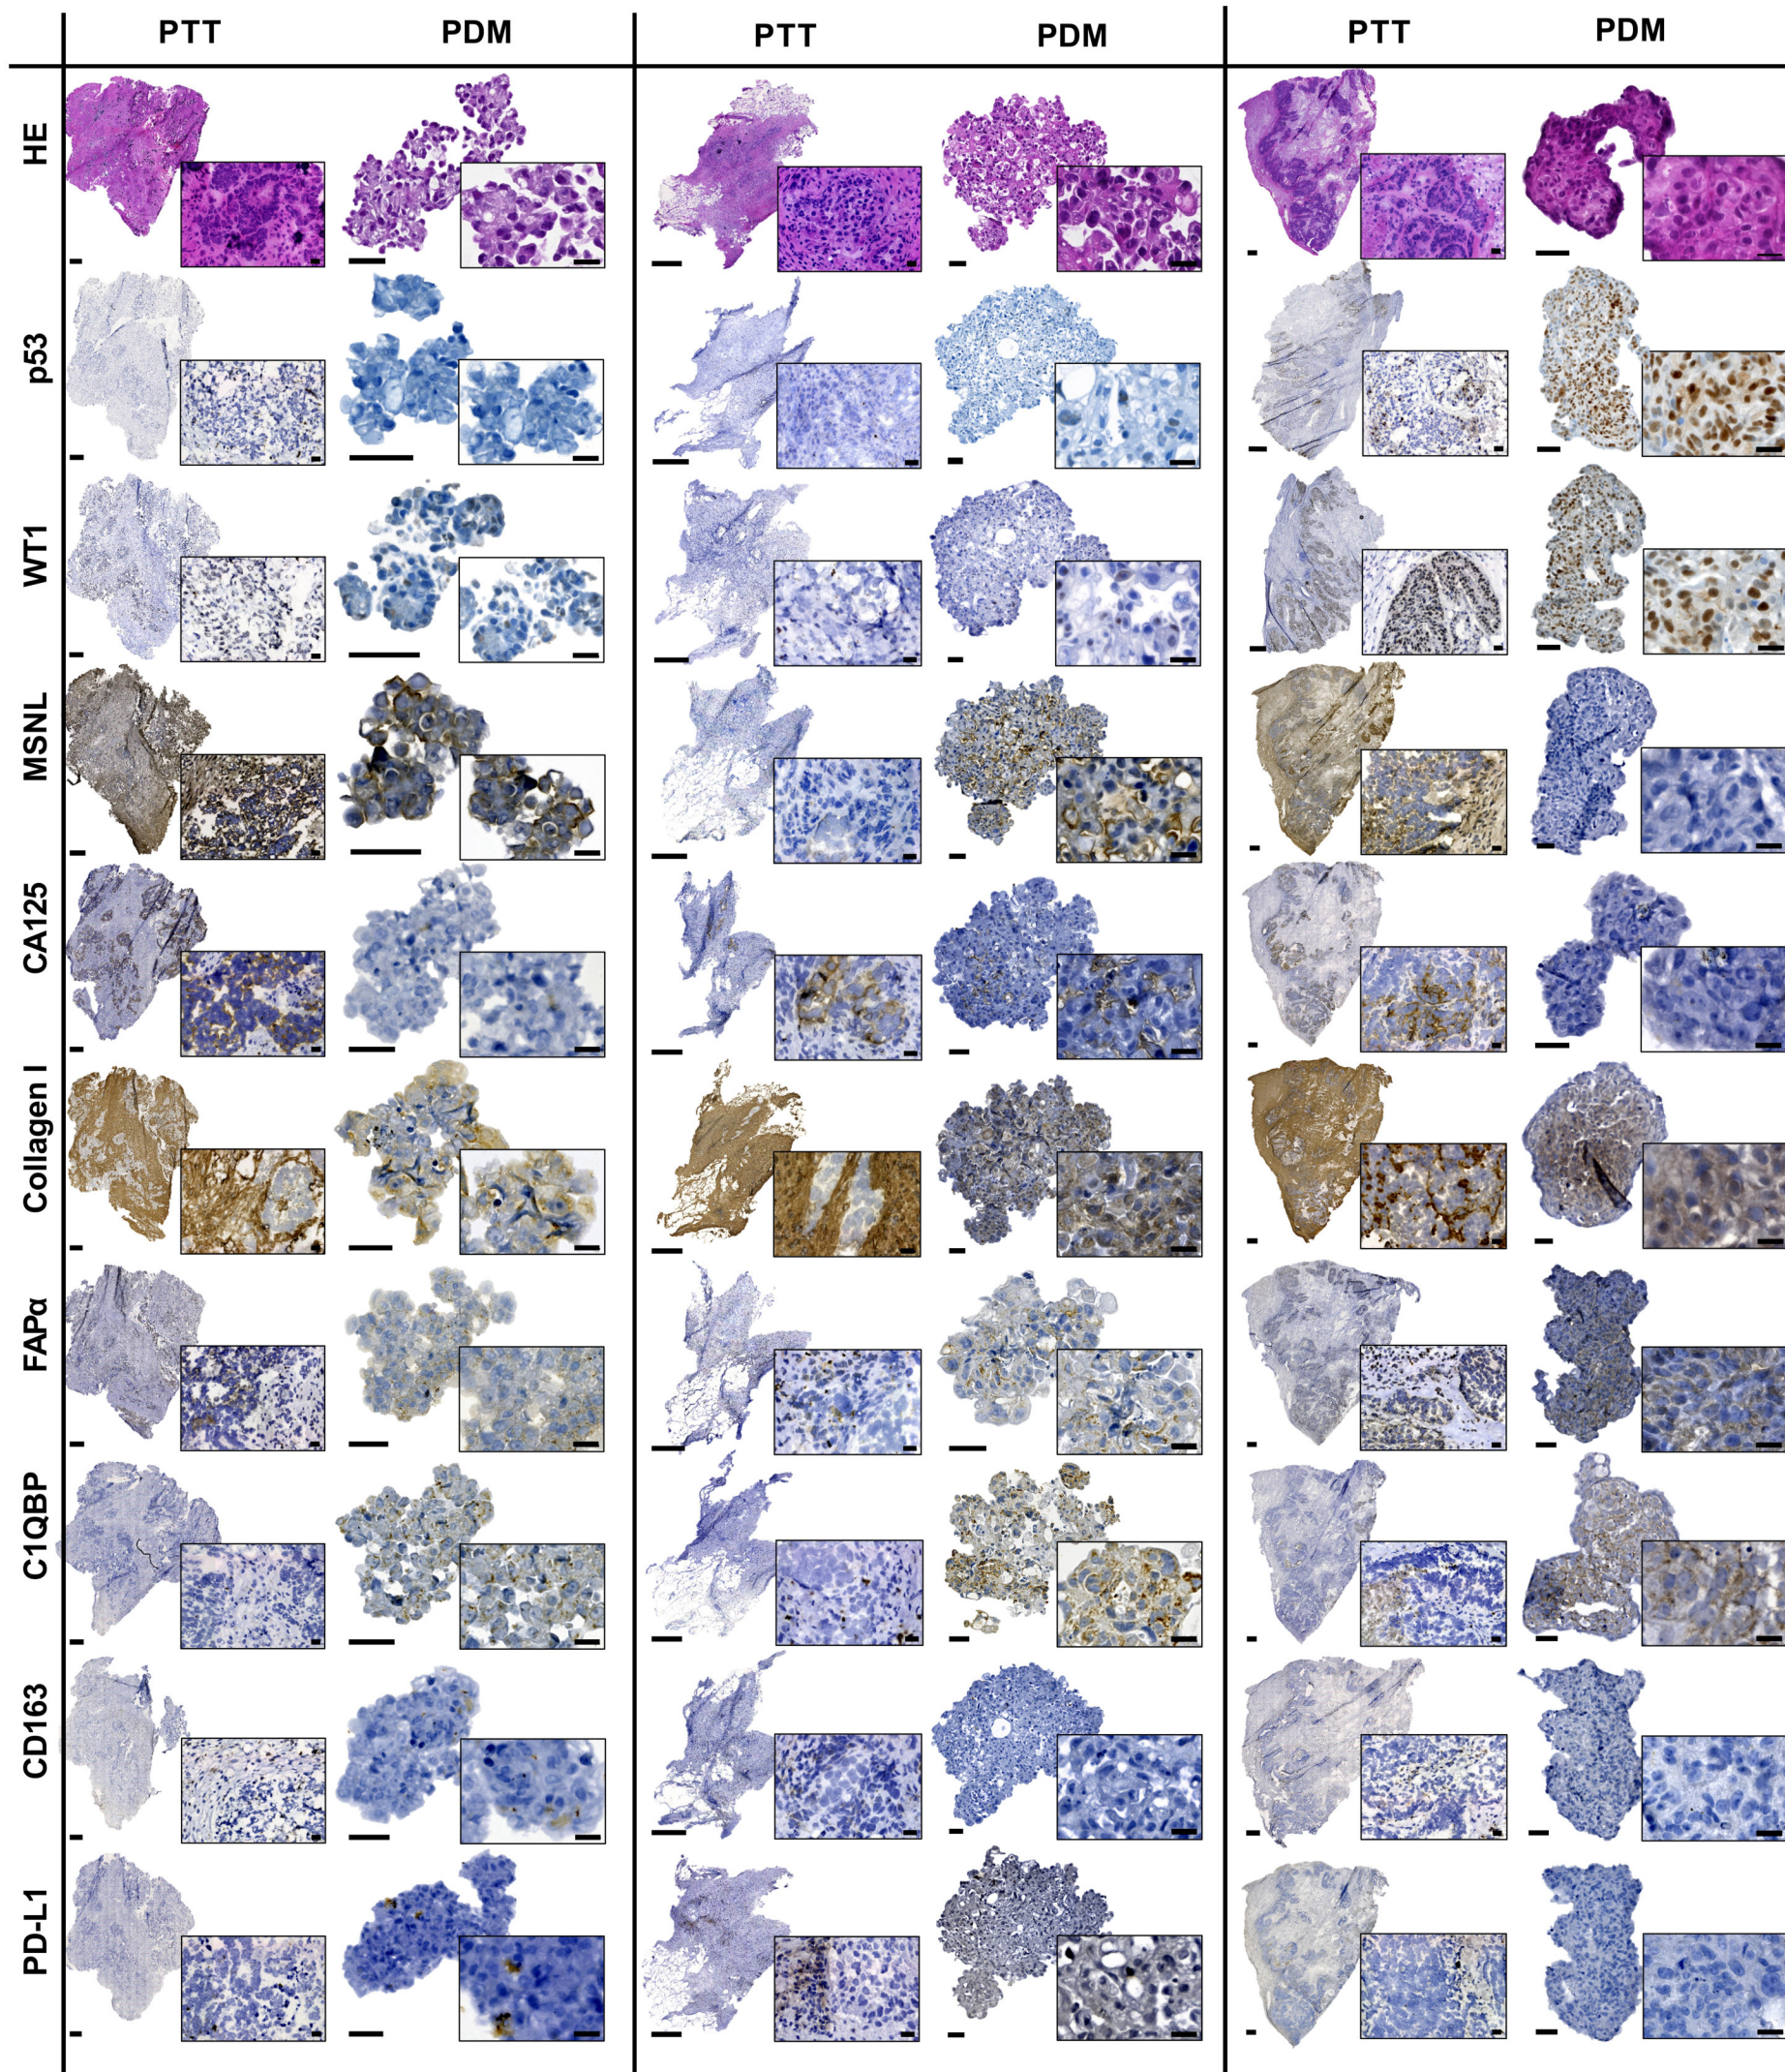

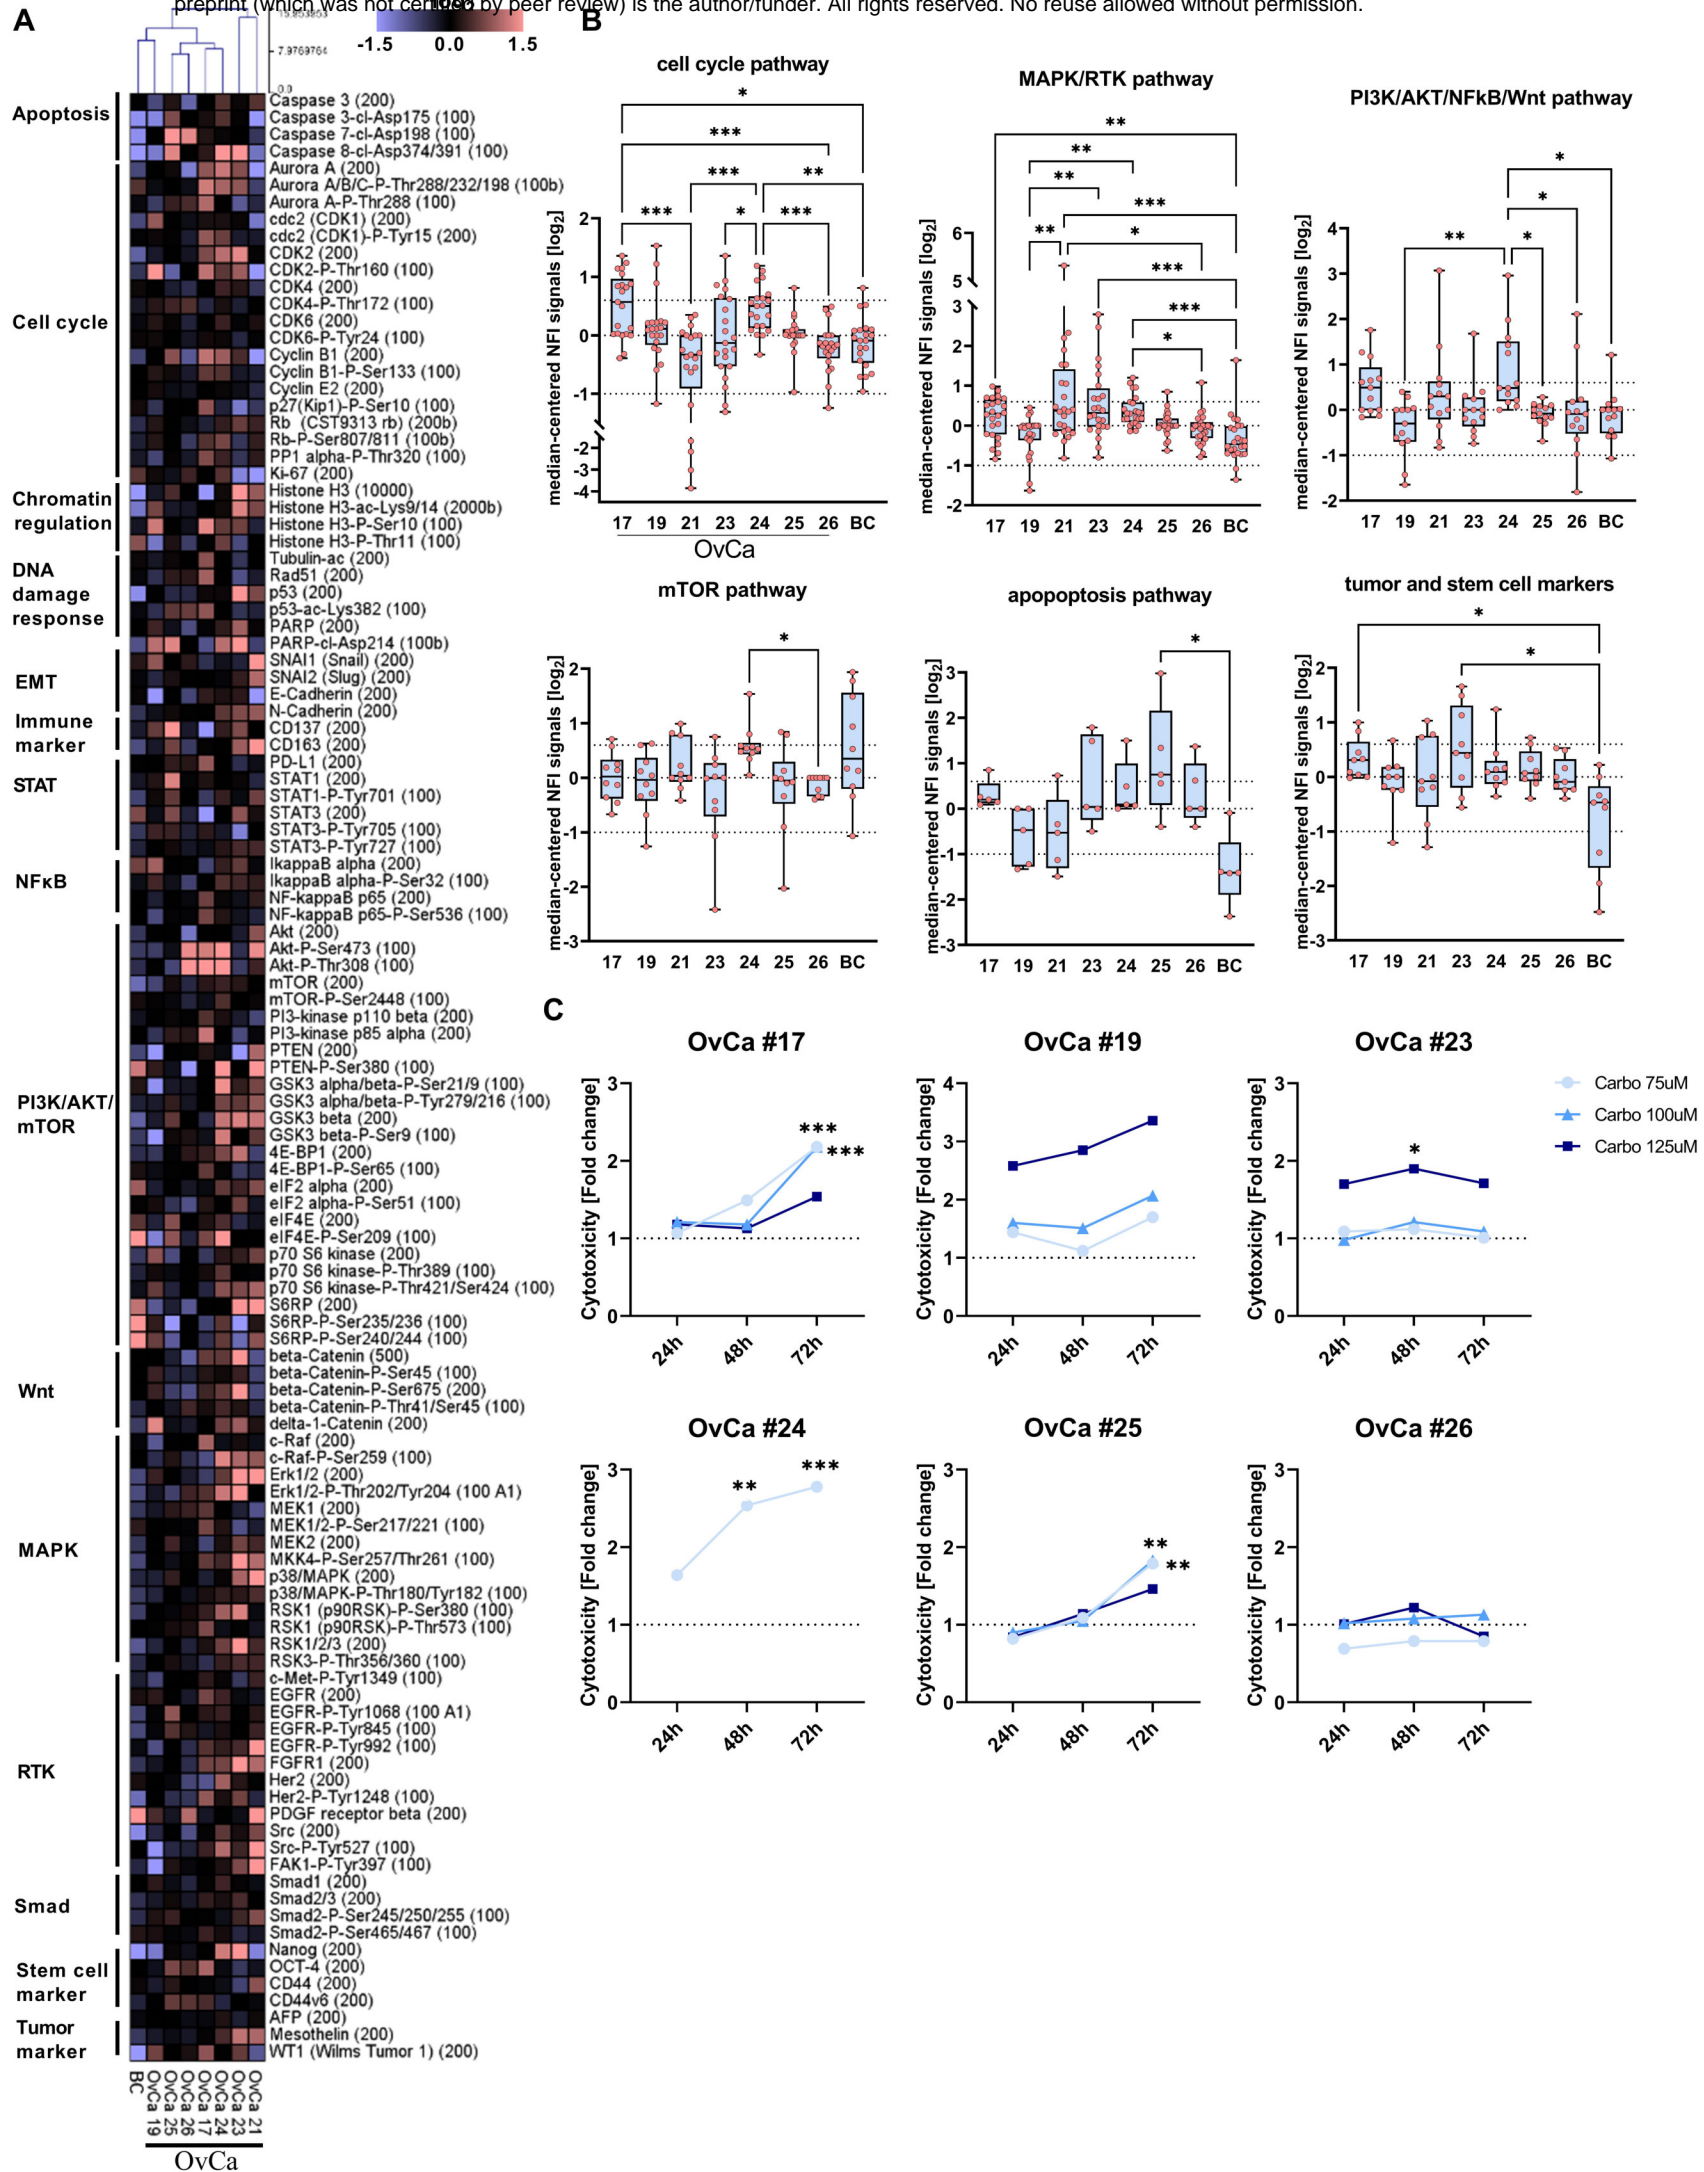

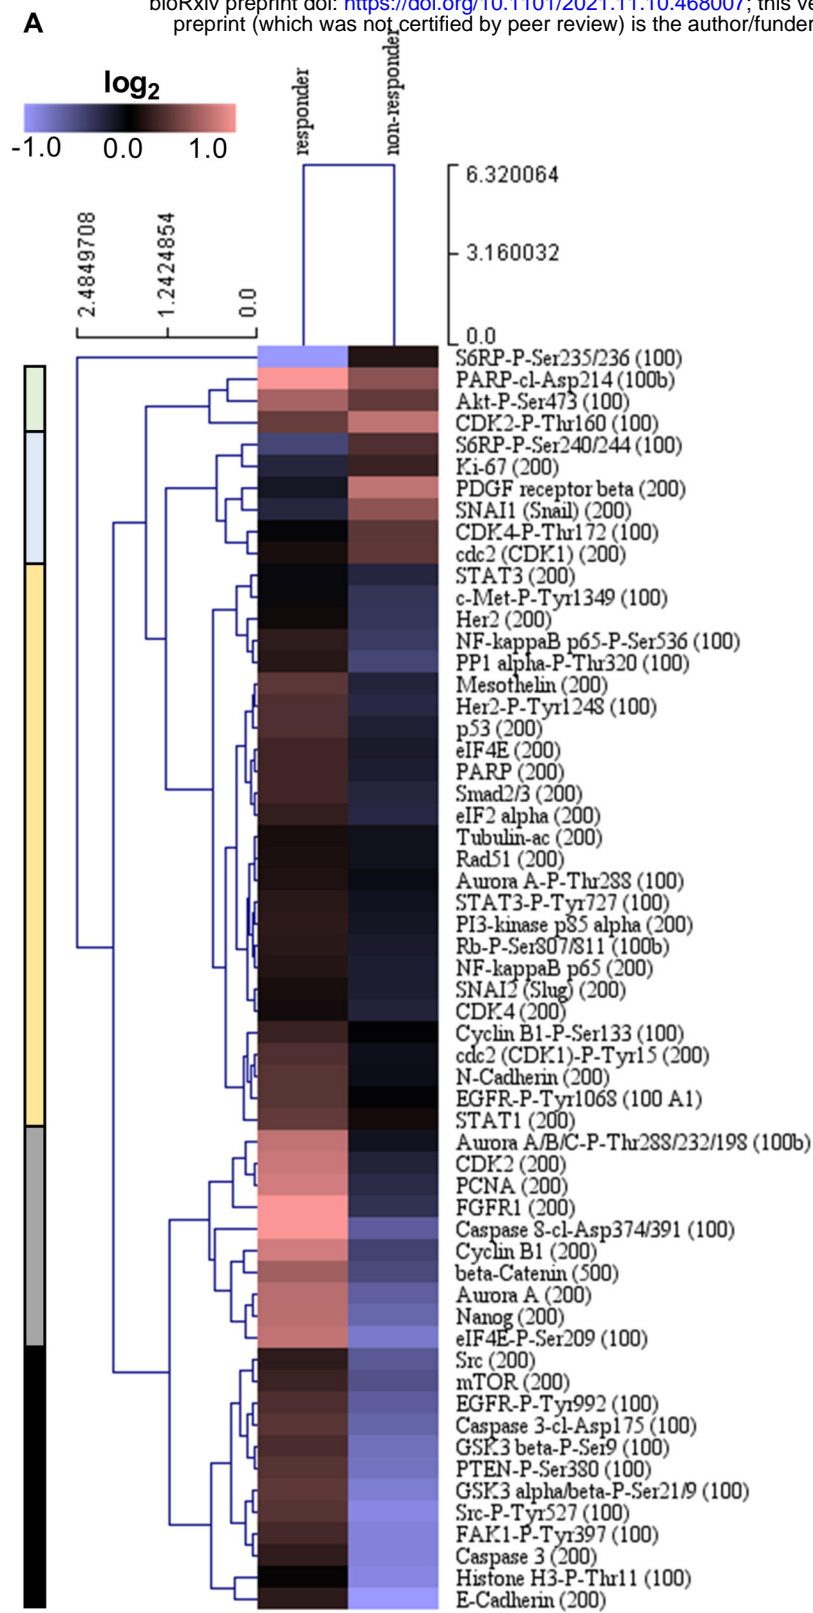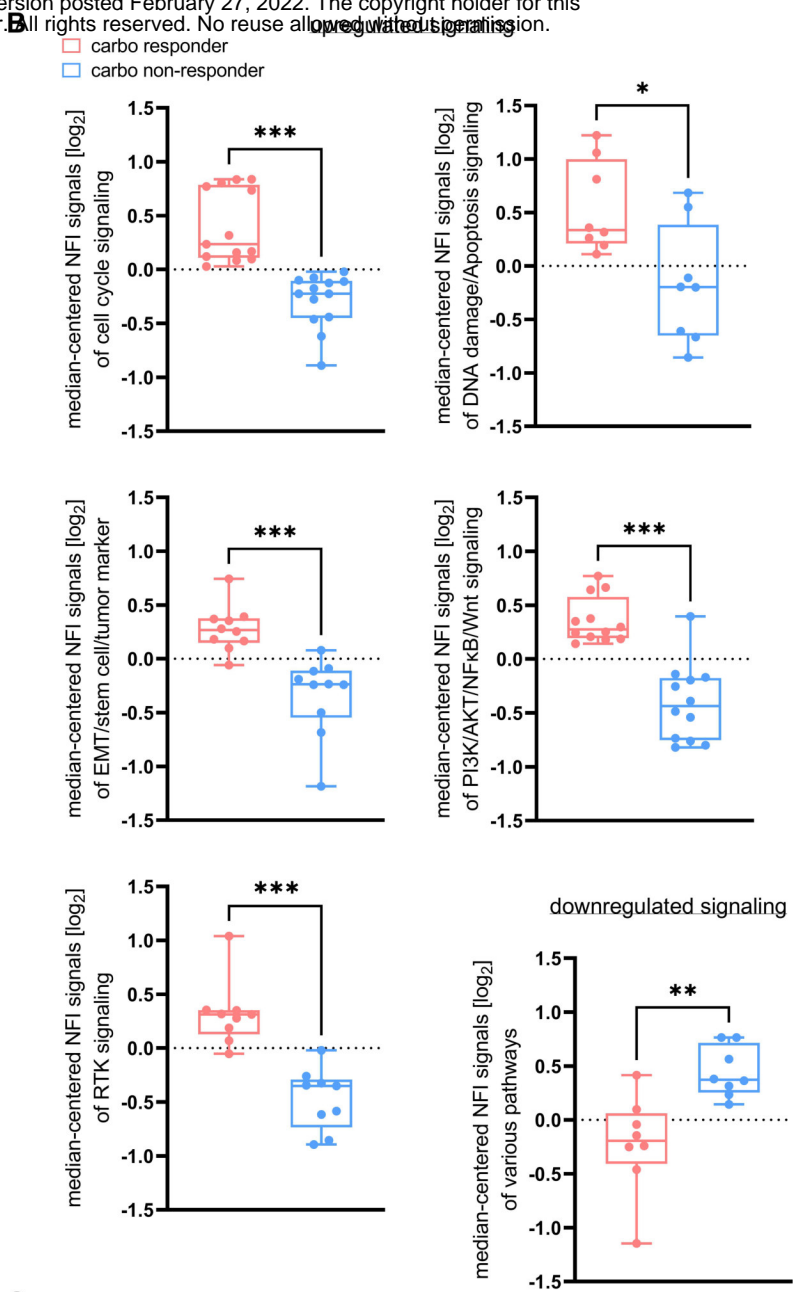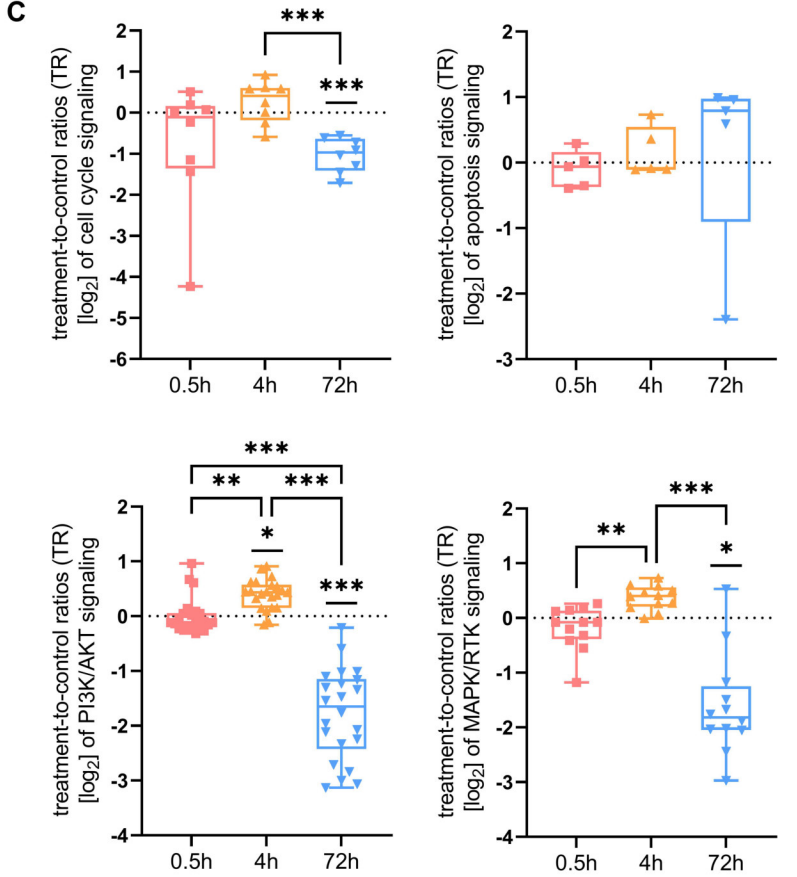

High expression in R and Non-R  
 High expression in Non-R  
 Moderate expression in R  
 High expression in R  
 Low expression in Non-R



**A**

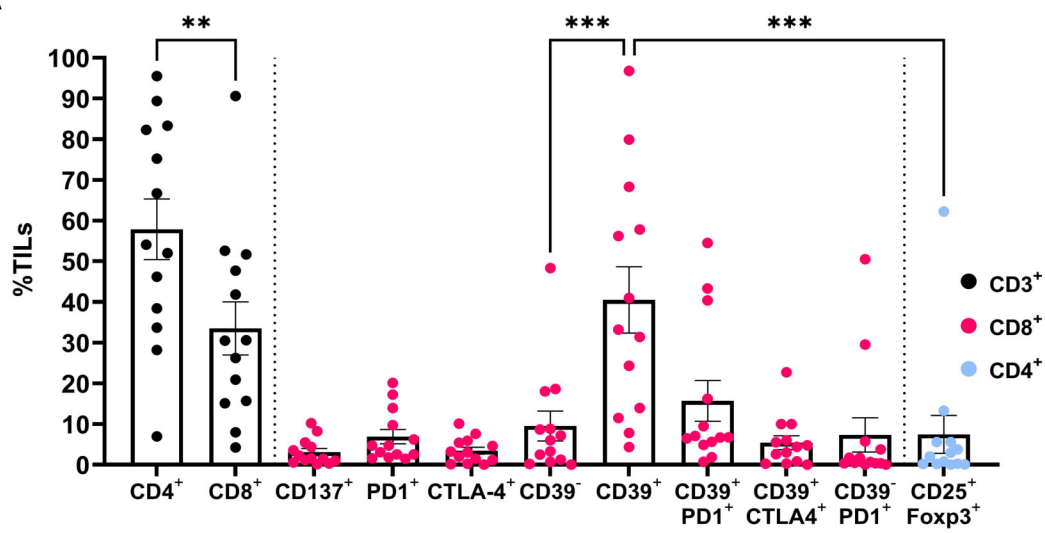

**C**

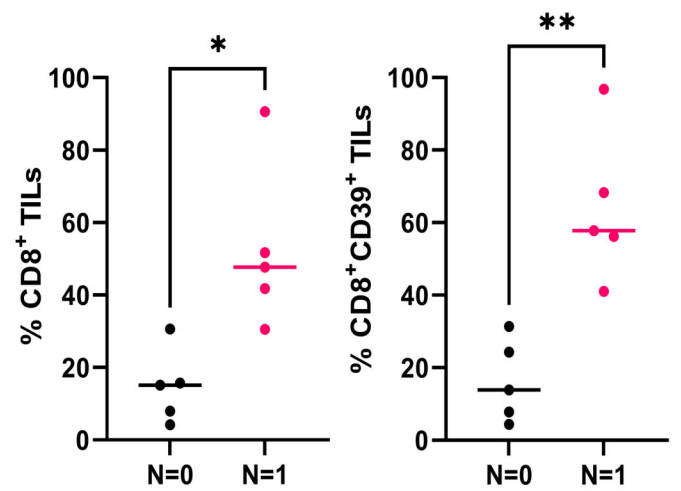

**B**

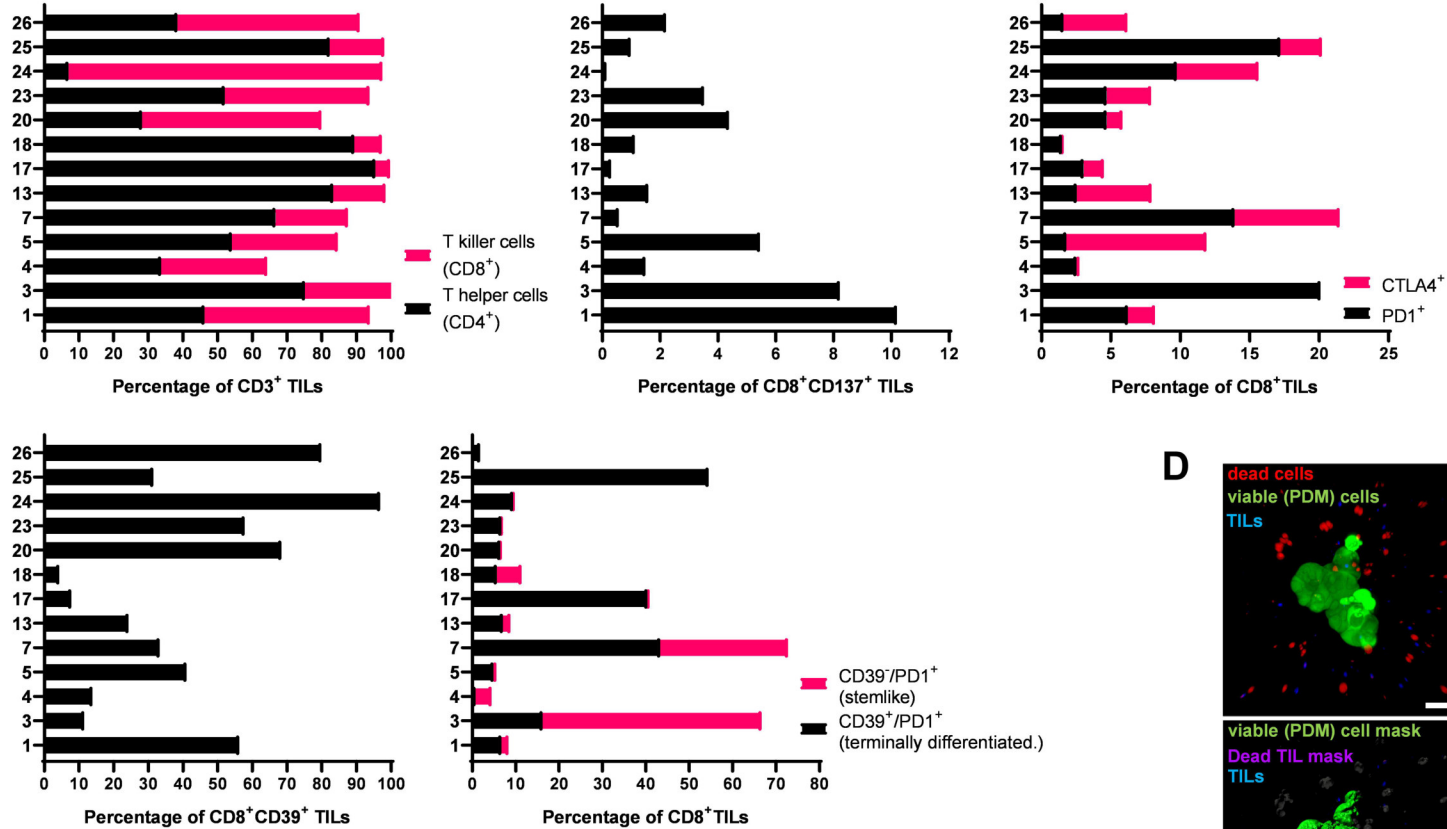

**D**

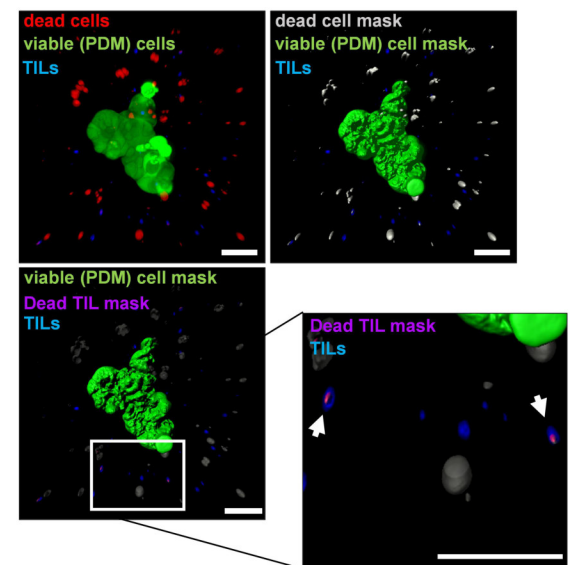

**E**

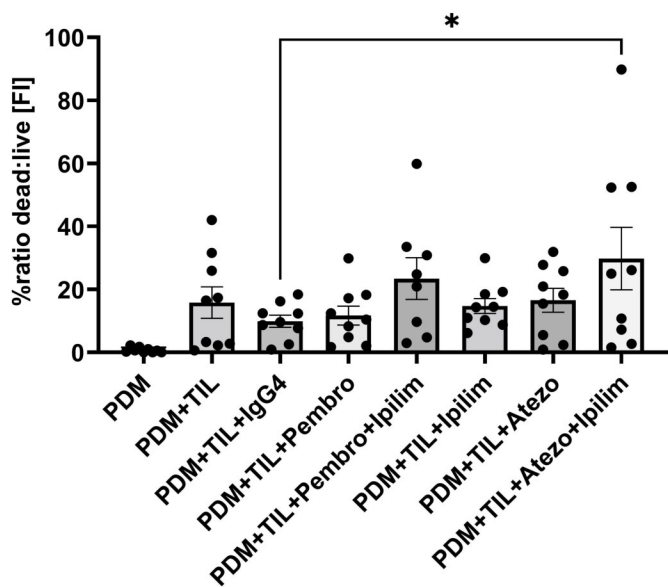

**F**

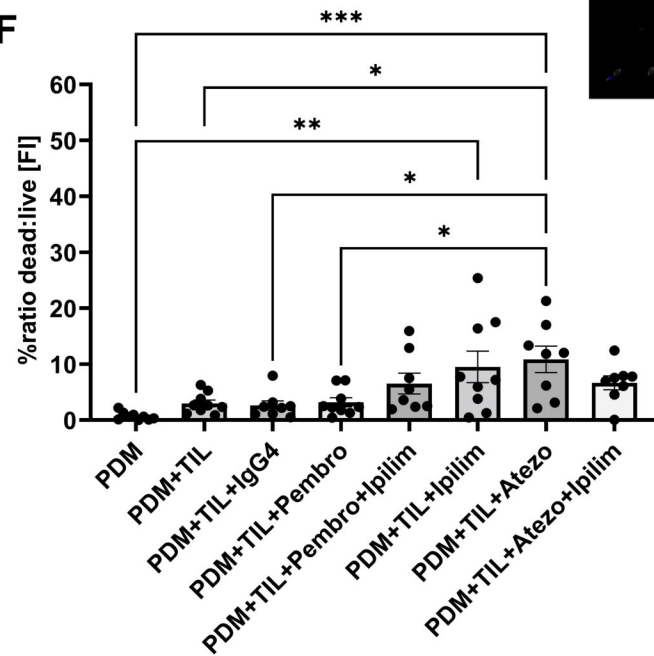

Source: https://www.biorxiv.org/content/10.1101/2021.11.10.468007v4.full.pdf
